# Supplementary material for: Multi-variable flood damage modelling with limited data using supervised learning approaches
Source: Copernicus journal article supplement (doi:10.5194/nhess-17-1683-2017), 2017-09-29
Supplement: Supplementary file 1 [file nhess-17-1683-2017-supplement.zip]

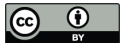

*Supplement of*

## **Multi-variable flood damage modelling with limited data using supervised learning approaches**

**Dennis Wagenaar et al.**

*Correspondence to:* Dennis Wagenaar ([dennis.wagenaar@deltares.nl](mailto:dennis.wagenaar@deltares.nl))

- [nhess-17-1683-2017-supplement-title-page.pdf](#)
- Meuse data
  - [test\\_data.csv](#)
  - [train\\_data.csv](#)

The copyright of individual parts of the supplement might differ from the CC BY 3.0 License.
