# Supplementary material for: Multi-variable flood damage modelling with limited data using supervised learning approaches
Source: Copernicus journal article supplement (doi:10.5194/nhess-17-1683-2017), 2017-09-29
Supplement: Supplementary file 2 [file nhess-17-1683-2017-supplement.zip]

Archive with 4 entries (3 files):
- nhess-17-1683-2017-supplement-title-page.pdf
- Meuse data/
- Meuse data/train_data.csv
- Meuse data/test_data.csv
