# Supplementary material for: Multi-variable flood damage modelling with limited data using supervised learning approaches
Source: Copernicus journal article supplement (doi:10.5194/nhess-17-1683-2017), 2017-09-29
Supplement: Supplementary file 2 [file nhess-17-1683-2017-supplement.zip › Meuse data/test_data.csv]

Total damage	Structure damage	Content damage	Water depth	Inhabitants	Basement	Detached	footprint	Construction age	Water depth model	Living area	Flow velocity	Duration	Return Period
1745	450	1295	0.01	1	0	1	172	47	1.7037801	173	0.447388	517	9
10185	7835	2350	2.05	3	1	1	102	43	0.988512	180	0.237698	659	37
2849	1000	1849	1.5	4	1	1	394	93	0.548986	227	0.0961119	398	68
11300	0	11300	0.6	2	0	1	124	19	1.66778	113	0.376715	551	10
25138	8668	16470	0.55	5	0	1	115	63	0.889696	172	0.041311	231	25
6838	2360	4478	0	2	1	1	59	33	0.133144	100	0.0506303	94	118
9228.8	2783.8	6445	0.16	4	0	0	109	28	0.720697	131	0.0953734	128	119
9355	6480	2875	0.18	3	0	0	118	28	0.720697	111	0.0953734	128	119
1070	810	260	0.15	2	1	0	66	28	0.679442	98	0.110872	148	77
5798.8	2783.8	3015	0.13	2	0	0	63	28	0.630322	94	0.128416	124	108
7110	7110	0	0.15	3	1	0	55	28	0.679442	98	0.110872	148	77
9454.8	2783.8	6671	0.14	4	1	0	51	45	0.940211	93	0.2113	267	17
11594.8	2783.8	8811	0.09	2	1	0	57	45	0.756126	122	0.0812024	109	62
10145.8	2783.8	7362	0.35	1	1	1	125	36	0.876145	128	0.353243	333	12
14930	11330	3600	0.3	5	1	1	84	44	1.4194	120	0.300875	508	16
0	0	0	0.44	0	0	1	231	37	1.86473	314	0.306023	575	10
20750	18950	1800	0.2	4	1	1	89	16	1.538	145	0.343158	517	12
9895	7475	2420	0.2	4	0	1	102	27	0.531348	129	0.132846	229	44
8215	8035	180	1	2	0	1	156	16	0.667924	176	0.107018	129	61
20236	11886	8350	0.4	2	0	1	331	92	0.539041	243	0.0937284	150	54
3644	960	2684	0	4	1	1	171	75	0.344942	199	0.0314269	133	48
3608.8	2783.8	825	0	1	1	0	193	92	0.291709	205	0.0901239	212	49
10075	7475	2600	0.3	1	1	0	155	33	2.30602	244	0.592946	465	12
9468	7568	1900	0.3	2	1	1	149	92	1.80414	147	0.365099	360	16
12555	6320	6235	0.07	1	1	0	287	30	1.48057	194	0.278473	463	12
10477.8	2783.8	7694	0.3	1	0	0	64	4	2.01477	90	0.430505	410	14
5800	3900	1900	0.18	3	1	0	129	19	0.793715	242	0.269554	291	30
6873.8	2783.8	4090	0.3	1	0	0	68	4	1.0184799	90	0.285335	318	29
18945	17520	1425	0.7	2	1	1	99	92	2.0171199	170	0.363464	466	12
4041	2191	1850	0.12	2	0	1	152	118	0.684405	303	0.152815	313	37
905	135	770	0	2	1	0	89	143	0.583211	160	0.125491	288	38
9590	7750	1840	0.1	1	1	1	158	92	0.684405	255	0.152815	313	37
3740	3740	0	0.03	4	1	0	125	66	0.583211	102	0.125491	288	38
2275	1525	750	0.2	2	1	0	93	113	0.684405	311	0.152815	218	50
11000	7000	4000	0.2	4	0	0	170	107	0.685045	285	0.169281	371	48
7700	2700	5000	0.2	1	1	1	354	83	0.972237	283	0.154959	249	10
8000	2000	6000	0.2	2	1	1	67	41	0.913265	133	0.137803	261	14
23303	12263	11040	0.15	7	1	1	316	92	1.04646	423	0.141181	216	15
9070.8	2783.8	6287	0.08	2	0	0	62	9	0.373395	67	0.185024	149	49
8163.8	2783.8	5380	0.1	1	0	0	70	9	0.374035	84	0.30515	224	33
7333.8	2783.8	4550	0.08	2	0	0	61	9	0.373395	56	0.185024	160	21
4933.8	2783.8	2150	0.2	1	0	0	60	4	0.833583	82	0.399213	302	26
5833.8	2783.8	3050	0.1	1	0	0	63	9	0.373395	67	0.185024	149	49
2683	1848	835	0	3	1	1	128	5	1.17917	196	0.0128267	266	33
4175	3200	975	0.26	2	1	1	146	25	0.162021	130	0.0277976	321	50
19500	2700	16800	0.28	0	1	1	219	83	0.20707	233	0.0429228	149	136
6800	4000	2800	2	3	1	1	96	20	1.74296	161	0.447039	411	47
19900	4350	15550	0.31	2	1	0	345	32	0.468216	187	0.162571	337	50
17397	7779	9618	0.33	4	1	0	546	15	0.495223	177	0.199515	593	59
8260	8260	0	0.15	2	0	0	98	7	0.320943	137	0.107217	167	50
1400	0	1400	0	2	0	0	55	4	0.282877	105	0.0677043	465	50
5692	3142	2550	0.15	2	0	0	106	5	0.432989	156	0.0556091	227	50
23450	17150	6300	0.2	2	1	1	109	83	0.66461	217	0.219554	290	42
8850	5850	3000	0	4	1	1	132	18	0.162097	51	0	330	61
7800	0	7800	0.4	4	0	0	202	94	1.45464	282	0.210232	207	59
180	100	80	0	4	1	1	243	63	0.701026	301	0.239277	218	259
0	0	0	0.75	0	1	1	117	26	1.02077	169	0.034323	271	50
21700	0	21700	0.3	2	0	1	86	30	0.253342	126	0.0299034	70	66
21810	11750	10060	0	2	1	1	141	94	0.153638	169	0.0338528	65	75
9209	1150	8059	0.1	2	0	1	576	27	0.258095	333	0.076964	107	58
29000	27000	2000	0.6	0	1	1	60	36	0.653685	91	0.0354277	141	71
5890	970	4920	0.4	2	0	0	90	3	0.360778	110	0.0644371	502	117
10897.31	6957.31	3940	0.17	2	0	0	65	11	0.173279	100	0.0308747	431	196
7610	4980	2630	0.8	0	0	0	915	9	0.545239	86	0.122875	228	61
12555.31	11255.31	1300	0.8	1	0	0	59	42	0.703892	125	0.0167475	126	53
16755.31	11255.31	5500	0.75	1	1	0	53	87	0.703892	85	0.0167475	126	53
23835.31	11255.31	12580	0.6	0	0	0	52	42	0.703892	141	0.0167475	141	48
15733.81	11255.31	4478.5	0	2	1	0	444	5	0.963399	88	0.008871	173	47
10004	4604	5400	1	2	1	0	94	72	0.496021	84	0.0594307	396	53
7380	7380	0	1.1	0	0	0	62	36	1.09998	109	0.115369	307	20
16645.31	11255.31	5390	0.44	3	1	0	89	43	0.592371	121	0.0366637	435	166
0	0	0	0.85	0	1	0	418	19	0.0423727	69	0.0079368	337	312
20895.31	11255.31	9640	1.2	1	1	0	418	19	0.0423727	69	0.0079368	337	312
13535.31	11255.31	2280	0.2	1	1	0	76	33	0.106825	67	0.0048301	60	86
0	0	0	0.3	1	1	0	82	35	0.596517	66	0.102891	338	51
2291.5	2291.5	0	0.4	1	1	1	53	35	0.738517	118	0.0444191	476	77
1390	0	1390	0.02	10	1	0	151	88	0.515274	106	0.0395019	264	50
10477	9477	1000	1	0	1	0	257	83	0.593046	81	0.0378793	228	50
6704	2824	3880	0.6	2	1	0	72	87	0.655338	201	0.105377	541	50
600	0	600	0.7	2	1	0	163	0	0.991992	61	0.0638692	136	50
804	0	804	0.55	1	1	0	222	0	0.991992	64	0.0638692	136	50
2050	0	2050	0.6	1	1	0	82	0	0.991992	72	0.0638692	135	50
9939	5989	3950	0.8	4	1	0	201	41	0.991992	54	0.0638692	129	50
8650	0	8650	0.65	2	0	0	222	0	0.991992	59	0.0638692	136	50
5235	0	5235	0	2	0	0	82	0	0.991992	66	0.0638692	135	50
22200	0	22200	0.73	2	0	0	82	0	0.991992	72	0.0638692	135	50
26460	0	26460	0.8	1	0	0	163	0	0.991992	58	0.0638692	136	50
23891	0	23891	0.7	2	0	0	82	0	0.991992	72	0.0638692	135	50
26500	14000	12500	0.7	1	1	0	82	0	0.991992	72	0.0638692	135	50
52670	0	52670	0.73	2	0	0	163	0	0.991992	72	0.0638692	136	50
42323	0	42323	0.65	2	1	0	94	10	0.991992	74	0.0638692	136	50
42990	0	42990	0.5	2	0	0	82	0	0.991992	72	0.0638692	135	50
5000	2900	2100	2.2	3	1	0	75	88	1.09525	196	0.0994112	136	50
5450	2100	3350	0.3	4	1	0	70	78	0.761448	124	0	166	50
20900	9950	10950	1	4	1	0	78	83	1.09525	272	0.0994112	135	50
760	0	760	0.68	2	0	0	21	30	0.889963	149	0.0711345	174	50
7200	0	7200	0.4	2	1	0	66	83	0.812922	115	0.0806002	177	50
21650	8950	12700	0.65	1	1	0	80	83	0.812922	115	0.0806002	177	50
13370	9070	4300	0.17	2	1	0	50	78	0.761448	46	0	152	50
10010	5260	4750	0.6	4	1	0	91	63	0.895045	167	0.0661598	204	50
10715	6625	4090	0.55	4	1	0	138	33	0.876965	109	0.0602005	193	50
46145	8450	37695	0.76	3	1	1	98	63	0.895045	170	0.0661598	204	50
20600	8400	12200	0.4	4	1	0	57	9	0.74345	94	0.0510955	150	50
18351	12476	5875	0.73	5	1	0	112	83	0.85311	167	0.0842166	155	50
2850	1870	980	0.5	2	1	0	87	63	1.09525	165	0.0994112	145	49
6508	5258	1250	0.45	0	1	0	53	66	1.09525	101	0.0994112	145	49
14510	7860	6650	0.35	1	0	0	135	83	1.0891401	201	0.0657189	149	48
14480	10660	3820	0.3	4	1	0	108	73	1.0891401	146	0.0657189	142	49
8816	6196	2620	0.42	4	1	0	120	73	1.07074	145	0.0992597	170	50
46660	19010	27650	0.01	6	1	0	67	83	0.873863	109	0.120324	168	50
300	0	300	0	1	1	0	61	12	0.85311	95	0.0842166	129	50
2465	0	2465	2.1	1	1	0	162	9	1.18372	108	0.131848	186	50
4650	0	4650	0.2	3	1	0	61	12	0.85311	95	0.0842166	129	50
5180	0	5180	0.55	4	0	0	165	9	1.01955	71	0.0731491	186	50
7200	6900	300	0.25	2	0	0	164	9	1.01121	108	0.107368	183	50
11600	9500	2100	0.25	4	0	0	164	9	1.01121	71	0.107368	183	50
10800	0	10800	0.65	2	0	0	162	9	1.18372	71	0.131848	186	50
22583	22033	550	0.25	2	0	0	164	9	1.01121	71	0.107368	183	50
17149	15131	2018	0.3	4	0	0	164	9	1.01121	108	0.107368	183	50
4600	0	4600	1.5	4	1	0	49	34	0.355492	112	0.0284932	159	50
3600	3300	300	0	3	1	0	78	61	0.448967	198	0.0230337	107	52
3081.5	1762.5	1319	1.8	1	1	0	75	78	0.83909	132	0.0408144	138	50
2605	0	2605	0.01	6	1	0	605	10	1.0148	63	0.0895419	134	50
23094	13343	9751	0.17	4	1	0	605	10	1.0148	70	0.0895419	134	50
3650	0	3650	0.1	1	1	0	82	41	0.425854	193	0.0237762	104	57
13035	12735	300	0.35	4	1	0	90	74	0.833264	192	0.0415867	127	52
1110	0	1110	0.05	2	1	0	181	87	0.653687	236	0.041206	258	50
17262.39	14462.39	2800	0.02	6	1	0	468	12	0.873863	120	0.120324	147	50
19676.39	14462.39	5214	1.4	1	0	0	949	11	0.997483	77	0.0942119	412	48
16632.39	14462.39	2170	1	2	0	0	949	11	0.997483	95	0.0942119	412	48
23537.39	14462.39	9075	0.32	1	0	0	67	13	1.09463	130	0.134109	163	47
24722.39	14462.39	10260	0.4	2	0	0	52	13	2.0018799	87	0.0851708	163	46
15962.39	14462.39	1500	0.31	2	0	0	52	13	1.09109	87	0.112544	160	44
28927.89	14462.39	14465.5	0.32	4	0	0	69	13	1.09109	132	0.112544	172	44
17647.39	14462.39	3185	0.3	4	0	0	51	13	1.026	115	0.126549	164	46
22427.39	14462.39	7965	0.25	3	0	0	84	13	0.909729	128	0.109611	148	50
19762.39	14462.39	5300	0.18	3	0	0	81	13	0.630795	87	0.0746525	173	47
16307.39	14462.39	1845	0.3	4	0	0	73	13	0.971865	87	0.128478	149	50
3715	3015	700	0.39	4	0	0	105	12	0.657496	155	0.107054	268	47
5025	2450	2575	0.25	1	0	0	50	12	0.493717	98	0.0961813	357	42
33837.01	26437.01	7400	0.35	2	0	0	509	12	1.1027499	38	0.102677	151	50
29987.01	26437.01	3550	0.3	4	0	0	509	12	1.1027499	44	0.102677	151	50
30037.01	26437.01	3600	0.15	3	0	0	61	12	0.785611	95	0.079715	183	50
28412.01	26437.01	1975	0.3	2	0	0	60	12	1.1246901	95	0.0817009	264	48
10600	9750	850	0.47	5	0	0	68	12	1.1985199	112	0.145869	369	25
31587.01	26437.01	5150	0.25	5	0	0	65	12	1.04355	101	0.170746	218	47
30617.01	26437.01	4180	0.12	3	1	1	58	10	0.852595	107	0.0711494	161	50
2920	0	2920	0.24	2	0	0	61	12	0.852595	101	0.0711494	134	50
29797.01	26437.01	3360	0.13	2	0	0	65	12	0.615576	104	0.0890046	289	38
27837.01	26437.01	1400	0.2	3	0	0	80	12	0.852595	115	0.0711494	134	50
31127.01	26437.01	4690	0.13	4	0	0	61	12	0.615576	101	0.0890046	289	38
28437.01	26437.01	2000	0.12	5	0	0	62	12	0.615576	101	0.0890046	236	45
28887.01	26437.01	2450	0.25	4	0	0	60	12	0.551082	101	0.0589196	138	50
37967.01	26437.01	11530	0.13	3	0	0	392	12	0.464665	98	0.0511946	100	50
37332.01	26437.01	10895	0.14	4	0	0	61	12	0.464665	101	0.0511946	91	50
35922.01	26437.01	9485	0.2	2	0	0	66	12	0.494985	104	0.0714061	197	48
27587.01	26437.01	1150	0.15	1	0	0	68	12	0.581543	101	0.0476926	104	50
30847.01	26437.01	4410	0.32	4	0	0	60	12	0.67566	101	0.0458613	113	50
30502.01	26437.01	4065	0.2	4	0	0	61	12	0.581543	104	0.0476926	104	50
5920	4595	1325	0.25	2	0	0	66	12	0.218784	115	0.0135602	106	57
15930	4985	10945	0.7	4	0	0	59	10	1.02275	107	0.0822478	180	50
14966.14	12466.14	2500	1.6	1	0	0	979	11	1.47489	68	0.170948	353	30
15716.14	12466.14	3250	1.5	1	1	0	979	11	1.47489	68	0.170948	353	30
35487.01	26437.01	9050	0.13	3	0	0	114	8	0.455715	139	0.0534479	141	50
31187.01	26437.01	4750	0.12	2	0	0	89	8	0.455715	128	0.0534479	105	50
28370	9670	18700	0.21	4	0	0	65	12	0.517933	101	0.0574431	112	50
4460	1460	3000	0.3	2	0	0	66	7	0.474405	104	0.0538691	73	51
13600	9100	4500	0.4	2	1	0	117	9	0.517907	135	0.0448187	188	49
12805.31	11255.31	1550	1	1	0	0	479	10	1.0192	95	0.0653554	403	48
14255.31	11255.31	3000	1.1	2	1	0	407	10	1.0192	89	0.0653554	401	38
15255.31	11255.31	4000	1	2	0	0	407	10	1.0192	89	0.0653554	401	38
18115.31	11255.31	6860	1.1	1	1	0	479	10	1.0192	94	0.0653554	403	48
13755.31	11255.31	2500	1.1	2	1	0	479	10	1.0192	94	0.0653554	403	48
7100	2100	5000	0.5	5	1	0	51	57	0.886399	105	0.0422117	157	50
10000	8000	2000	0.5	7	1	0	51	57	0.75642	101	0.0381634	141	50
13250	13250	0	0.4	3	0	1	418	10	0.931075	146	0.310856	380	24
950	950	0	0	4	1	0	65	20	0.624856	171	0.0461306	192	65
6930	2600	4330	1.3	3	1	0	96	93	0.734187	189	0.0748343	252	51
12480	7600	4880	0.5	4	1	0	89	93	0.734187	168	0.0748343	252	51
7460	1960	5500	0.5	1	1	0	133	93	0.734187	217	0.0748343	273	48
20789	14004	6785	0.35	2	1	0	71	22	0.624856	171	0.0461306	192	65
1500	1350	150	0.5	4	1	0	104	67	0.734187	261	0.0748343	284	51
2075	1925	150	0.2	2	0	0	113	173	1.04993	343	0.0805966	363	50
1925	825	1100	0.9	4	1	0	137	67	0.83993	313	0.0381186	355	50
9587	9237	350	0	2	1	0	103	62	0.727428	144	0.023387	351	50
4130	4130	0	0	3	1	0	92	62	0.727428	127	0.023387	350	51
5550	3700	1850	0.38	2	1	0	82	87	0.857433	97	0.0595225	357	50
9810	7010	2800	0.42	2	0	0	161	93	1.07491	197	0.0581969	352	51
2910	2380	530	0.4	1	1	0	54	93	0.972423	97	0.0555707	359	50
4140	2240	1900	0.2	2	0	0	98	21	0.837419	139	0.0306662	347	51
7844.8	5228.8	2616	0.15	1	0	0	65	17	0.782425	130	0.0239863	345	53
10512	9237	1275	0	2	1	0	89	41	1.17219	263	0.0774411	365	22
9237	9237	0	1	2	1	0	74	54	1.16457	186	0.07989	331	36
17185	15185	2000	0.6	1	1	0	207	93	1.98484	210	0.210352	433	34
3275	1275	2000	0	1	1	0	151	27	0.922196	105	0.0299754	354	50
10677	9237	1440	0.15	3	1	0	96	73	0.919774	150	0.0385664	315	53
3300	3000	300	0	3	1	0	58	64	0.919774	107	0.0385664	315	53
8612	7642	970	0.35	1	0	0	76	40	1.0422601	159	0.0476218	292	52
3336	1986	1350	0.6	3	0	0	106	83	1.1197701	149	0.0576423	341	54
6260	560	5700	0.02	4	0	0	76	95	0.867263	127	0.027645	296	51
13080	11330	1750	0.45	1	1	0	111	88	1.14976	122	0.0792211	333	50
5960	4060	1900	0.2	4	1	0	95	21	1.0422601	159	0.0476218	317	50
6620	2820	3800	0.4	3	1	0	70	21	1.02977	152	0.0859402	345	50
10555	8555	2000	0.05	2	1	0	70	21	0.669757	152	0.0191668	335	51
7905	5405	2500	0.41	3	1	0	106	80	1.02977	134	0.0859402	353	50
12630	11910	720	0.6	2	1	0	90	65	0.862265	135	0.0921735	353	50
5608.66	2408.66	3200	0.7	4	1	1	100	21	0.862265	155	0.0921735	318	52
6725	3325	3400	1.2	1	1	0	96	43	0.629759	328	0.0190186	262	54
5000	5000	0	1.5	4	1	1	176	73	2.30882	330	0.0249748	533	86
1500	1000	500	0.01	3	1	0	111	63	0.470785	202	0.154668	100	51
11920	11920	0	0.55	2	0	0	49	11	0.545009	117	0.044569	266	51
5595	1525	4070	0.25	7	0	0	51	11	0.0850759	117	0.0089611	105	173
16134.67	2134.67	14000	0.4	2	1	0	80	65	0.48758	145	0.0169039	208	90
20564.67	2134.67	18430	0.15	2	0	0	60	88	0.117933	108	0.0209939	552	115
12319.67	2134.67	10185	0.25	2	0	0	127	58	0.117933	210	0.0209939	463	198
33070	16370	16700	0.3	4	1	0	91	70	0.527809	171	0.0567292	463	51
1530	1530	0	0	3	1	0	76	45	0.282979	91	0.0229766	326	105
2134.67	2134.67	0	0	4	1	0	53	45	0.282979	83	0.0229766	326	105
170	170	0	0	4	1	0	84	27	0.282979	146	0.0229766	326	105
4560	3575	985	0.2	4	0	0	147	76	0.325415	115	0.0375505	142	53
2854.67	2134.67	720	0	1	1	0	52	45	0.222189	97	0.0099084	251	47
19675	14825	4850	0.5	4	0	1	64	62	0.545009	145	0.044569	270	49
2864	2864	0	1	1	1	1	141	90	0.325415	205	0.0375505	125	52
1000	1000	0	0.04	2	0	0	83	113	0.204895	91	0	170	45
1305	1065	240	0.2	2	1	0	102	89	0.204895	122	0.0128142	210	48
7080	4380	2700	0.11	4	1	0	83	113	0.204895	91	0.0128142	170	45
12568	2650	9918	0.18	4	1	0	105	89	0.204895	118	0.0128142	210	48
5284.67	2134.67	3150	0.3	1	1	0	187	43	0.216258	307	0.0359793	266	50
3783	3783	0	0	1	1	0	182	113	0.204895	168	0.0128142	170	45
15275	0	15275	0.08	0	1	1	114	82	0.419939	130	0.0141091	251	47
21832	8565	13267	0.2	2	1	0	118	59	0.470295	180	0.0345516	252	48
20259	14444	5815	0.15	5	1	0	145	6	0.470295	228	0.0345516	349	50
16995	12300	4695	0.27	3	0	1	173	79	0.545009	218	0.044569	278	48
435	435	0	0	2	0	0	95	0	1.85682	106	0.8107	155	40
200	200	0	0	2	0	0	53	66	0.581956	82	0.0338987	158	50
20241	15291	4950	0.47	5	1	0	95	0	3.3750701	106	0.221613	131	13
12043	7643	4400	0.2	2	1	1	125	61	2.4277201	196	0.0702848	172	27
10534.67	2134.67	8400	0	2	1	0	308	61	0.495712	225	0.0341952	175	46
2530	1180	1350	0	2	1	1	141	88	0.214418	34	0.0532739	237	52
18334.67	2134.67	16200	0.1	2	0	0	126	65	0.316706	238	0.0351184	122	59
1550	750	800	0	5	1	0	94	63	0.294084	170	0.0216071	147	59
56742	55027	1715	0	2	1	1	94	63	0.294084	170	0.0216071	147	59
0	0	0	0.1	1	0	1	66	19	0.128338	115	0.0261059	224	77
11100	1700	9400	0.55	3	1	0	162	87	0.453157	239	0.0783948	225	50
9670	9670	0	0	4	0	1	368	36	0.0088749	340	0.014138	39	97
1000	1000	0	1	2	1	0	50	17	0.48135	109	0.0482767	188	52
10109.67	2134.67	7975	0.12	2	0	0	85	80	0.325018	111	0.0309354	157	51
6334.67	2134.67	4200	0.12	3	0	0	83	71	0.325018	175	0.0309354	104	50
5734.67	2134.67	3600	0.13	3	0	0	144	64	0.336273	180	0.0244082	207	55
3969.67	2134.67	1835	0.2	2	0	0	60	43	0.515947	93	0.0663878	245	51
6074.67	2134.67	3940	0.15	5	0	0	103	29	0.465916	163	0.0388916	200	52
4999.67	2134.67	2865	0.15	1	1	0	114	8	0.465916	163	0.0388916	254	52
6202.67	2134.67	4068	0.13	2	1	0	150	63	0.400943	212	0.0343612	208	66
8483.67	2134.67	6349	0.12	1	0	0	625	0	1.47357	74	0.0919753	333	50
13571	7546	6025	1.35	3	1	0	62	38	0.0049992	139	0	-999	1250
3100	1250	1850	1.6	2	1	0	57	4	0.653989	97	0.0393203	589	119
2400	1250	1150	1.6	2	1	0	77	4	0.271504	97	0.112529	618	336
18220	13170	5050	0.95	4	1	0	152	54	0.688968	204	0.0255226	410	48
10440	6770	3670	1.3	2	1	0	108	23	2.4270501	241	0.36935	399	15
45200	21500	23700	0.95	3	0	0	226	80	0.72679	523	0.0645495	262	41
5634.67	2134.67	3500	0.2	3	1	0	95	4	0.609004	128	0.167765	602	177
19705	17605	2100	0.3	4	0	1	107	4	0.149004	162	0	542	101
4884.67	2134.67	2750	0	1	1	0	119	84	0.222555	196	0.0634035	221	46
10617	5617	5000	0.1	2	1	1	115	0	0.246985	172	0.0140314	211	46
49370	41670	7700	0.1	2	1	1	152	0	0.359872	175	0.0244074	141	50
1324	1074	250	1.24	3	1	0	71	25	0.0972781	172	0.0247216	208	110
3350	2200	1150	1.1	1	1	0	47	26	0.812236	146	0.0376035	233	39
3280	2050	1230	1	2	1	0	86	26	0.812236	196	0.0376035	233	54
3575	1600	1975	1.2	4	1	0	78	25	1.51811	163	0.130509	236	11
7173	6873	300	0.15	2	0	0	83	2	0.0990162	120	0.008269	154	70
13262	4962	8300	0.02	2	0	0	74	2	0.0874019	104	0.007653	128	76
4957.95	2780.95	2177	0	4	0	0	74	2	0.0874019	104	0.007653	162	72
4100	1300	2800	0	3	1	1	150	31	0.533991	132	0.0701233	175	67
1900	1500	400	0	4	1	1	135	38	0.441177	138	0.067777	310	51
4965	1940	3025	0	0	1	1	121	70	0.533991	139	0.0701233	179	66
28500	14850	13650	0.42	4	1	1	190	28	0.655414	278	0.0652318	245	49
14986	11670	3316	0.3	2	0	1	182	27	0.520532	139	0.0490856	329	50
8492	4892	3600	0.25	3	0	1	735	73	0.467826	157	0.0800422	401	50
6670.95	2780.95	3890	0.3	1	1	1	323	83	0.573104	160	0.169378	232	40
4672.95	2780.95	1892	0.37	3	0	0	119	103	0.599946	114	0.0614752	169	50
12515.95	2780.95	9735	1.19	2	1	0	66	44	1.01669	90	0.0652125	402	18
6300	5950	350	0.61	2	0	0	81	43	0.766636	118	0.0721747	403	38
24074	10475	13599	1.08	2	1	0	93	44	1.01669	140	0.0652125	440	12
14740	13240	1500	0	4	1	1	150	113	0.442421	179	0.0840384	277	47
13750	7600	6150	0.15	4	1	0	179	113	0.537729	192	0.140857	275	43
15841	3826	12015	0.35	4	0	0	240	113	0.697452	61	0.106656	212	48
14910	8910	6000	0.5	3	1	1	104	123	0.766636	139	0.0721747	401	45
24640	13840	10800	0.4	3	1	1	129	3	0.766636	275	0.0721747	403	38
29030	19480	9550	0.8	2	1	0	178	58	0.935797	356	0.0667221	362	39
629	629	0	0.15	2	1	1	170	68	0.16951	171	0.0309655	261	53
14480.95	2780.95	11700	0.5	2	1	0	140	93	0.646592	174	0.0850784	229	44
6026.95	2780.95	3246	0.15	1	0	0	326	123	0.487917	101	0.100309	196	57
5100.95	2780.95	2320	0.45	1	0	0	71	14	0.640158	84	0.111639	274	58
11630	6630	5000	0.7	1	1	0	76	33	1.07867	129	0.0722858	282	50
25800	13200	12600	0.6	4	1	0	87	34	1.03227	146	0.0647486	283	50
7690	1690	6000	0.5	2	1	0	64	35	0.980426	121	0.0669949	296	50
13650	11100	2550	0.58	2	0	1	112	68	0.874542	105	0.0537307	283	50
7660.95	2780.95	4880	0.5	1	1	0	110	3	0.81208	112	0.0564289	292	50
7280	6560	720	0.6	4	1	1	148	68	0.877321	242	0.0616711	286	50
27528	10418	17110	1.1	4	0	1	95	19	0.741747	183	0.0603775	269	50
15140	3595	11545	0.9	1	0	0	102	20	0.874542	130	0.0537307	292	50
8020	4048	3972	0.23	1	1	1	170	103	0.675131	62	0.0402658	195	50
10530.95	2780.95	7750	0.15	1	0	0	61	19	0.675432	106	0.0686707	384	45
6998	6098	900	0.3	2	1	0	70	24	0.744587	124	0.0928169	444	35
9650	9650	0	0.2	2	1	0	62	19	0.675432	106	0.0686707	384	45
21850	18400	3450	0.1	5	0	0	60	23	0.559339	112	0.0688882	491	49
6130.95	2780.95	3350	0.65	3	0	0	222	123	1.03829	236	0.0455905	256	13
14590.95	2780.95	11810	1.3	1	0	0	143	44	1.12528	263	0.071868	253	11
4860	3060	1800	1.6	2	1	1	92	73	0.562194	151	0.0758191	277	45
18620	13200	5420	0.4	5	1	1	232	83	0.716028	141	0.143295	258	36
8700	8400	300	0.75	4	0	0	143	39	1.00491	140	0.0843998	353	23
15200	8400	6800	0.6	4	1	1	68	58	0.813905	134	0.0713153	240	31
4697	1520	3177	0.1	1	1	1	161	38	0.562194	108	0.0758191	329	46
12315	9664	2651	0.05	2	1	1	126	65	0.562194	179	0.0758191	343	47
8869	7940	929	0.1	3	1	0	90	1	0.362806	153	0.0638423	143	49
0	0	0	0	2	0	0	139	73	0.362806	117	0.0638423	158	47
14875.95	2780.95	12095	1.35	2	1	0	69	28	1.0973099	84	0.0888558	592	50
8190.95	2780.95	5410	0.7	1	1	0	55	28	1.0973099	93	0	603	50
10780.95	2780.95	8000	0.7	1	0	0	55	28	1.0973099	93	0	603	50
26395.95	2780.95	23615	1.2	1	0	0	55	28	1.0973099	93	0	603	50
10707	6357	4350	0.65	4	0	0	59	22	0.931892	117	0.111319	521	50
8020	6770	1250	0.6	2	0	0	89	17	0.744587	161	0.0928169	510	48
17850	4500	13350	0.86	3	0	0	53	25	0.932693	91	0.0601354	570	50
24285	11335	12950	0.71	5	0	0	49	22	0.931892	108	0.111319	566	50
43835	19355	24480	1	4	0	0	132	25	0.975938	123	0.0782678	581	50
2995.95	2780.95	215	0.2	1	0	0	51	5	0.589025	94	0.110497	334	50
2110	2110	0	0.16	1	0	0	117	3	0.51168	102	0.100314	419	68
9976	4330	5646	0.23	4	0	1	89	3	0.589025	102	0.110497	337	50
12930	12000	930	0.1	2	1	0	82	0	0.223981	120	0.156061	219	52
13200	6330	6870	0.12	2	0	0	61	3	0.589025	110	0.110497	256	50
13770	11120	2650	0.55	4	1	0	85	24	0.74116	160	0.0570791	499	52
9087	5447	3640	0	2	1	1	85	113	0.38756	123	0	382	51
23380.95	2780.95	20600	0.45	1	1	0	117	28	0.640217	159	0.0292519	546	51
22700	16400	6300	0.25	3	1	1	88	33	0.505755	154	0.0350233	500	53
10730.95	2780.95	7950	0.85	3	1	0	73	29	0.977191	93	0.0382265	532	81
41000	29000	12000	0.8	2	0	1	130	21	0.956868	167	0.0733802	452	50
28580	14585	13995	0.85	4	1	0	63	26	0.956868	95	0.0733802	452	50
62895	19755	43140	1.2	3	1	0	45	28	0.977191	83	0.0382265	559	52
29240	6930	22310	0.8	2	1	0	146	29	0.622454	91	0.025401	391	115
14125	5450	8675	0.75	1	0	0	65	8	0.609184	111	0.0483162	503	91
14634.27	6184.27	8450	0.5	4	0	0	52	4	0.609184	115	0.0483162	544	66
33336	18893	14443	0.82	3	0	0	121	4	0.730911	116	0.0663735	445	50
18537.27	6184.27	12353	0.7	5	0	0	57	8	0.609184	111	0.0483162	503	91
4005.95	2780.95	1225	1.2	2	1	0	107	59	0.113146	143	0.0092077	183	90
6050	300	5750	0.15	2	1	1	177	27	0.421081	186	0.0372941	317	62
6678	5358	1320	0	2	1	1	103	83	0.719857	125	0.11024	196	37
3660	760	2900	0	2	1	0	100	81	0.0184021	142	0.0163828	77	93
2600	0	2600	0.2	2	1	0	69	81	0.0184021	136	0.0163828	77	93
8561	2611	5950	0.1	3	1	0	139	17	0.54417	201	0.0684495	269	48
1850	1300	550	0	2	1	1	180	33	0.169011	205	0.0107216	417	50
5560	5560	0	1	4	1	1	91	13	0.578739	176	0.290762	202	54
18360	14360	4000	0.1	0	1	1	125	223	0.257095	310	0.0870278	110	60
5500	0	5500	0	3	1	1	219	43	0.779274	97	0.317476	154	33
3593	2693	900	0	4	1	1	203	31	0.786175	175	0.144565	106	48
3313.5	1656.75	3650	0	2	1	1	141	54	0.62102	251	0.0299928	352	67
6430	2360	4070	1.5	4	1	0	119	32	0.942656	157	0.0215249	102	102
3313.5	1656.75	6750	0.15	2	0	0	56	6	0.483369	73	0.0266126	256	285
3313.5	1656.75	3370	0.3	1	0	0	49	6	0.483369	127	0.0266126	187	666
49030	13130	35900	1	5	0	1	122	16	1.6758	203	0.547433	192	26
38200	29700	8500	1.65	4	0	1	289	103	2.80794	199	0.645573	652	5
23523	6500	17023	1	1	1	0	249	9	1.74545	138	0.217191	195	11
12857	9057	3800	0.4	6	0	1	103	93	1.52351	142	0.214677	196	10
18554	9192	9362	0.6	4	1	1	172	363	1.58333	202	0.0601768	309	10
5500	5500	0	0	2	0	1	113	21	0.676173	134	0.143945	95	50
3313.5	1656.75	3125	0.3	2	1	1	540	364	1.63438	609	0.250248	142	10
11646	8250	3396	0.1	2	1	1	167	22	0.79091	256	0.190042	257	39
8275	2575	5700	0.3	3	0	1	206	16	2.53126	219	0.0364425	682	18
14300	10300	4000	0.35	5	1	1	115	23	1.3015701	165	0.459304	128	48
0	3	0	0.8	2	1	1	53	67	2.4387	135	0.596659	133	14
18516.04	4316.04	14200	0.6	2	1	1	59	67	2.4387	160	0.596659	133	14
0	3	0	0.75	2	1	0	78	93	0.936202	130	0.0140403	108	47
12011.04	4316.04	7695	1.1	2	1	0	79	35	3.58618	141	0.134267	140	15
7666.04	4316.04	3350	0.75	3	1	0	99	93	0.891232	142	0.012239	106	52
14471.04	4316.04	10155	0.75	2	1	0	94	93	0.891232	151	0.012239	105	56
6916.04	4316.04	2600	0.8	2	1	0	88	93	0.891232	136	0.012239	109	52
21816.04	4316.04	17500	0.85	3	1	0	80	93	0.891232	153	0.012239	105	56
6445.04	4316.04	2129	0	2	0	0	814	1	1.05556	50	0.0931124	221	44
6816.04	4316.04	2500	1.75	2	0	0	372	1	3.40885	69	0.309801	171	24
4816.04	4316.04	500	0	2	1	0	372	1	1.05556	50	0.0931124	257	36
8266.04	4316.04	3950	0.75	2	1	1	814	1	1.05556	50	0.0931124	257	36
11561.04	4316.04	7245	0.8	2	1	0	52	0	1.79276	98	0.0960307	155	20
18316.04	4316.04	14000	1.75	2	1	0	70	143	3.3602901	145	0.0932634	167	34
10666.04	4316.04	6350	1.65	2	0	0	51	0	3.1747899	98	0.151852	161	17
6896.04	4316.04	2580	1.75	1	1	0	61	143	3.2916901	141	0.942206	167	34
10616.04	4316.04	6300	0	3	0	0	372	1	1.05556	50	0.0931124	257	36
18532.1	7682.1	10850	0.2	2	1	0	818	0	0.636722	74	0.0638741	236	49
18117.1	7682.1	10435	0.2	1	1	0	818	0	0.636722	93	0.0638741	236	49
16200	11550	4650	0.5	2	1	0	93	143	3.2916901	68	0.942206	268	50
21000	9000	12000	0.9	1	1	0	95	72	1.70108	116	0.232532	186	12
10916.04	4316.04	6600	1	3	0	1	63	72	1.70108	94	0.232532	180	11
30578	17578	13000	1.25	5	1	0	58	63	1.83364	133	0.0612218	167	10
38564	18034	20530	0.78	1	0	0	50	98	1.49108	97	0.100379	257	14
9366.04	4316.04	5050	0.8	0	0	1	153	193	1.74878	316	0.106484	183	14
73950	41150	32800	1.3	2	0	1	142	92	2.2425101	190	0.27397	259	34
27615.04	4316.04	23299	1.25	1	1	1	88	38	2.2425101	118	0.27397	334	21
5114	4054	1060	0.1	2	0	0	952	98	0.83978	149	0.0946983	255	45
16580	15760	820	1.3	2	1	1	163	28	1.23707	286	0.0872952	175	57
7740	6740	1000	2.25	1	1	1	65	38	0.614721	153	0.121617	309	53
5825	1275	4550	1.5	4	1	1	64	38	0.614721	153	0.121617	309	53
2335	2335	0	1.2	2	1	0	93	33	0.469727	193	0.0526506	304	51
2474	2174	300	0.1	1	0	1	150	35	0.504532	244	0.0309666	119	52
4316.04	4316.04	0	0.7	0	0	1	116	6	0.708631	166	0.0494918	112	48
6816.04	4316.04	2500	1	1	0	0	166	3	1.78591	330	0.0400737	174	19
12880	12880	0	1.2	1	0	1	72	148	1.77042	146	0.282174	286	9
21205	16845	4360	0.3	4	0	1	340	44	1.26422	141	0.166662	331	10
5150	0	5150	2	2	1	0	261	133	0.78366	190	0.0106354	282	205
10300	0	10300	0.65	1	1	0	78	32	1.1486599	126	0.024708	279	10
28266	9950	18316	2.7	2	1	0	68	32	1.41368	139	0.0610591	274	18
6895	2500	4395	0.15	1	0	1	101	73	0.256658	337	0.0064453	132	80
2785	0	2785	0.2	2	0	1	397	14	0.22649	173	0.0087655	109	79
11595	0	11595	0.61	2	1	0	106	43	0.951252	133	0.034865	120	48
57870	34800	23070	0.7	4	1	1	100	43	0.971393	134	0.0611403	127	49
38880	9530	29350	1.05	3	0	1	112	13	1.26185	156	0.0635499	193	21
19305	10805	8500	0.4	1	1	1	98	163	0.597022	188	0.0565305	121	43
21262	20212	1050	0.4	2	1	1	88	153	0.595197	218	0.0448076	106	47
18955	16805	2150	0.4	6	0	1	118	73	0.921376	213	0.0737477	252	43
25075	6775	18300	0.7	1	0	1	172	193	1.52722	298	0.34066	109	49
5884.4	3569.4	2315	2	2	1	1	106	27	1.01223	182	0.117676	151	46
7350	5700	1650	0.25	2	1	1	81	23	0.786838	176	0.0227061	152	43
11825	4525	7300	0.05	2	1	1	217	118	0.833487	192	0.106586	116	48
18671	13162	5509	0.53	4	1	1	72	23	1.26676	175	0.0982189	154	46
8760	2470	6290	0.8	1	1	1	256	118	1.17182	317	0.159529	192	15
32360	6520	25840	0.6	4	0	1	158	118	1.06442	251	0.041557	229	31
34150	21500	12650	0.6	2	0	1	150	18	1.00491	253	0.0427485	282	44
20935	12135	8800	0.74	4	1	0	68	43	1.51187	129	0.209375	201	11
221515	59300	162215	1.1	2	0	1	153	23	0.331856	172	0.0141792	182	55
14460	12460	2000	0.8	3	0	1	99	14	1.0617599	164	0.10225	221	45
48580	19962	28618	0.86	1	1	1	102	14	1.17432	166	0.047594	195	25
30628	22815	7813	0.65	4	0	1	97	4	0.889108	194	0.0402151	156	48
20970	15660	5310	0.8	4	0	0	56	13	1.10682	136	0.0277055	181	35
23405	8700	14705	0.8	5	0	0	54	13	1.10682	136	0.0277055	181	35
14372	7662	6710	0.8	0	1	0	97	13	1.10682	143	0.0277055	181	35
11153	10493	660	0.72	4	0	0	58	14	0.961717	148	0.128383	196	49
21140	10540	10600	0.93	4	0	0	86	13	1.74437	152	0.0629021	189	33
26464	18030	8434	0.9	7	0	0	77	13	1.74437	136	0.0629021	189	33
31183	9035	22148	0.75	2	0	0	143	14	0.961717	170	0.128383	196	49
11237	7962	3275	0.62	5	0	0	66	5	0.919003	90	0.0617108	138	46
21430	21430	0	0.63	2	0	0	46	7	0.946595	100	0.0913791	154	49
20282.12	15802.12	4480	0.7	2	0	0	67	5	1.0114599	91	0.0455997	138	46
8655	3380	5275	0.63	2	0	0	66	5	0.919003	96	0.0617108	169	46
27537.12	15802.12	11735	0.68	3	0	0	46	8	0.951728	103	0.0784226	139	50
15700	12200	3500	0.6	1	0	0	65	10	1.01169	124	0.0741743	165	50
24013.12	15802.12	8211	0.8	2	0	0	62	10	1.05919	61	0.1103	165	50
11050	7100	3950	0.6	2	0	0	48	7	0.94408	98	0.105116	152	49
27202.12	15802.12	11400	0.58	3	1	1	48	7	0.914113	98	0.0652239	179	48
18105.96	10285.96	7820	0.8	6	0	0	56	12	1.15412	57	0.11328	178	50
19370.96	10285.96	9085	0.7	4	0	0	77	9	1.01917	72	0.0800845	172	50
24785.96	10285.96	14500	0.7	1	0	0	78	9	1.01917	78	0.0800845	172	50
20885.96	10285.96	10600	0.6	2	1	1	49	12	1.01168	154	0.145447	188	51
43305	17050	26255	0.72	3	0	1	61	12	1.05668	57	0.062043	175	50
22139	15150	6989	0.73	2	0	1	58	14	1.00929	135	0.0473828	170	40
52655	40155	12500	0.9	5	0	1	102	12	1.5618	196	0.0652225	181	23
15385.96	10285.96	5100	0.6	2	0	0	81	8	0.771826	159	0.0408787	123	47
17997.96	10285.96	7712	0.65	1	0	0	88	8	0.899295	159	0.0185459	154	40
27094.96	10285.96	16809	0.65	2	0	0	128	12	0.88431	189	0.036344	120	50
29619.96	10285.96	19334	0.97	1	0	0	86	8	1.7593	159	0.08924	158	31
28817.96	10285.96	18532	0.6	2	0	0	82	8	0.771826	159	0.0408787	123	47
24322.96	10285.96	14037	0.6	3	0	0	85	8	0.879201	159	0.0262493	161	46
20434	18194	2240	0.66	3	0	1	92	7	1.01415	119	0.0642277	182	36
28760	15440	13320	0.8	4	0	0	91	5	1.06407	133	0.03661	168	24
39840	15110	24730	0.62	2	0	0	88	7	0.886621	134	0.0599666	159	44
23265.96	10285.96	12980	0.8	2	0	0	91	4	1.32898	108	0.114323	173	13
10285.96	10285.96	0	0.8	1	0	0	68	4	1.29643	87	0.10487	156	15
20385.96	10285.96	10100	0.7	2	0	0	70	4	1.13396	87	0.0652666	140	18
32635.96	10285.96	22350	0.55	0	0	0	76	4	1.07397	90	0.0480537	140	49
23635.96	10285.96	13350	0.61	2	0	0	58	13	0.811774	118	0.0194771	167	54
11305.96	10285.96	1020	0.7	1	0	0	59	13	0.811774	118	0.0194771	167	54
26020.96	10285.96	15735	0.45	3	0	0	60	13	0.799293	102	0.0137483	172	55
14092	11852	2240	0.6	2	0	1	192	293	1.66441	221	0.028199	298	13
48961	26486	22475	0.95	3	1	1	167	93	2.2464499	169	0.0563663	251	186
16020	14020	2000	0.37	4	1	0	469	87	1.4014601	87	0.0560391	262	43
33885	24960	8925	0.25	2	1	1	63	21	1.15139	81	0.0144024	244	26
2250	0	2250	1.3	2	1	0	98	293	2.23646	161	0.0354998	278	69
108850	33850	75000	0.6	4	1	1	64	45	1.15139	98	0.0144024	235	27
23350	0	23350	1.2	2	1	0	67	293	2.23646	194	0.0354998	278	69
3200	0	3200	0.08	3	1	1	120	58	1.0182101	115	0.0641423	128	45
450	0	450	0	2	1	1	69	3	0.353849	69	0.042092	64	116
3750	0	3750	0.5	3	0	1	72	33	1.1218899	124	0.0220891	181	46
24150	22500	1650	0.43	4	0	1	96	28	1.1218899	137	0.0220891	214	42
8190	6510	1680	0.6	5	0	1	34	30	1.1218899	89	0.0220891	181	46
9350	7350	2000	0.05	2	1	1	116	78	2.1981201	120	0.410704	381	39
1200	1000	200	0.3	2	1	1	93	78	2.1981201	129	0.410704	381	39
11115	5490	5625	0.45	4	1	1	91	9	0.906064	164	0.0822809	200	116
4805	4505	300	0.09	2	1	1	144	15	0.502035	213	0.0292599	91	86
3750	1550	2200	0	2	1	1	190	20	0.722169	252	0.0816239	68	46
5500	5000	500	0.02	8	0	1	249	103	0.809306	203	0.0601587	65	45
495	495	0	0.15	4	1	1	71	27	0.527288	144	0.0350074	119	222
20550	9100	11450	0.3	1	0	1	124	20	1.13168	190	0.898937	107	49
700	200	500	0	1	0	0	337	68	0.142763	511	0.0595721	190	156
1350	0	1350	0	2	1	1	121	33	0.131457	144	0.0225596	315	206
53110	18885	34225	0.05	1	1	1	101	193	0.555478	169	0.324335	166	42
4160	2460	1700	0.2	3	1	1	257	118	0.442109	393	0.196463	148	39
26378	11928	14450	0.4	2	1	1	84	143	0.573614	82	0.374983	225	11
21061.61	6066.61	14995	0.5	3	0	0	95	103	0.827857	126	0.212074	172	23
1360	1360	0	0	1	1	1	167	0	0.338943	161	0.218256	143	48
8745	2895	5850	0.13	3	0	1	149	193	0.674515	201	0.335943	147	49
3272	600	2672	0	2	1	1	135	33	0.35968	151	0.162964	176	39
12375	4500	7875	0.02	4	1	0	172	143	0.674515	161	0.335943	136	50
4700	2000	2700	0.15	3	0	1	78	128	0.400476	130	0.114077	241	34
10775	3975	6800	0.2	4	1	0	123	135	0.400476	92	0.114077	241	34
35466.61	6066.61	29400	0.5	3	0	1	925	293	0.946407	925	0.147864	327	11
19650	14685	4965	0.09	4	1	1	229	34	0.516428	152	0.152997	169	34
9250	2200	7050	0.2	1	0	0	101	113	0.690709	122	0.315172	197	13
23515	8065	15450	0.5	3	1	1	243	63	0.753442	135	0.0975735	164	14
14500	12400	2100	0.1	3	0	1	105	98	0.643885	143	0.107198	241	10
19470	12870	6600	0.55	2	0	0	109	103	0.972051	156	0.260646	171	11
1380	750	630	0.01	2	1	1	81	98	0.639575	114	0	150	34
9170	5670	3500	0.2	3	0	1	81	98	0.639575	114	0.164007	150	34
5475	5475	0	0.05	2	1	1	81	98	0.639575	114	0	150	34
1240	1240	0	0	2	0	1	479	78	0.541962	471	0.0450215	133	48
10495	3495	7000	0.13	3	0	1	115	8	0.620585	74	0.182514	175	33
11745	5870	5875	0.25	4	0	1	100	9	0.876695	156	0.144782	336	15
15501.61	6066.61	9435	0.2	1	0	1	139	31	0.894475	158	0.344827	239	32
10141	8916	1225	0.1	4	0	0	135	103	0.769138	139	0.191256	190	37
6900	2600	4300	0.15	3	1	1	377	33	0.801507	399	0.196364	142	40
12470	8230	4240	0	0	1	1	171	113	0.722887	328	0.277807	155	42
22130	17230	4900	0.35	3	0	1	50	47	1.4552701	128	0.519747	320	48
19251.55	8150	11101.55	0.25	4	0	1	123	28	0.619111	157	0.161272	148	48
15480	10930	4550	1.2	3	1	1	140	61	0.656344	206	0.210569	146	45
12150	8800	3350	1.3	4	1	1	143	63	0.69473	259	0.461596	103	34
1330	1330	0	0	0	1	1	140	0	0.427907	169	0.112477	203	50
3155	3155	0	0.03	3	0	1	92	6	0.427907	98	0.112477	146	50
6639	1850	4789	0.15	3	0	0	89	6	0.558668	111	0.177309	124	51
12070	10620	1450	0.15	2	0	1	92	6	0.558668	114	0.177309	124	51
7320	7040	280	0.1	4	0	1	94	16	0.691999	131	0.173223	205	40
1313	613	700	0.15	2	0	0	129	2	0.497369	159	0.139553	125	48
6925	325	6600	0	2	0	0	102	23	0.15966	113	0.0173244	60	131
7580	7580	0	0.1	3	0	1	49	20	0.481847	104	0.0981433	180	56
4300	4300	0	0	2	0	1	71	11	0.15966	160	0.0173244	68	228
8950	3680	5270	0.32	3	0	0	158	4	0.647385	226	0.199365	107	46
12790	12790	0	0.15	4	0	1	116	20	0.481847	122	0.0981433	180	56
13500	8000	5500	0.05	4	1	1	89	20	0.235155	122	0.0597886	86	58
7690	7690	0	2.6	4	1	0	110	4	0.779032	192	0.201935	190	46
3970	920	3050	0.15	3	0	1	115	18	0.407323	126	0.197186	72	70
2200	1000	1200	0	3	1	0	147	98	0.284973	123	0.107245	62	93
8000	4500	3500	0.15	3	1	0	124	108	0.296985	50	0.125333	136	55
13300	10500	2800	0.25	2	1	0	101	113	0.352188	308	0.159287	98	81
44500	20000	24500	0	3	1	1	116	63	0.284425	126	0.151811	73	91
5180	2130	3050	0.2	2	1	1	274	108	0.582303	131	0.642784	166	37
58545	30930	27615	0.4	2	1	0	153	170	0.590171	148	0.430989	111	55
4860	2200	2660	0.15	3	0	1	277	143	0.510894	169	0.389472	96	62
16500	6400	10100	0.4	2	1	1	135	36	0.86039	121	0.338285	315	20
19846.48	13846.48	6000	0.08	1	1	0	74	36	0.674428	136	0.477275	262	18
4449	900	3549	0.13	1	1	0	64	21	0.6986	124	0.25597	288	24
11900	5700	6200	0.25	2	0	0	66	21	0.747751	118	0.281467	250	15
14528.61	6066.61	8462	0.49	1	1	0	73	36	0.86039	121	0.338285	328	17
43040	14505	28535	0.33	2	1	0	72	36	0.86039	121	0.338285	377	15
29759	16365	13394	1	2	1	1	72	36	0.907134	121	0.345897	365	18
4150	600	3550	0.05	2	0	0	60	41	0.532813	189	0.0471222	97	86
15966.61	6066.61	9900	0.25	1	0	0	81	23	0.570395	102	0.249872	175	37
6200	1200	5000	0.12	5	0	0	158	1	0.538279	176	0.23315	156	41
11580	7480	4100	0.3	4	1	0	90	56	0.538279	135	0.23315	254	25
15330	5600	9730	0.45	4	0	0	68	47	0.656703	83	0.282909	288	19
11675	5450	6225	0.4	4	0	0	116	21	0.581394	120	0.250563	198	36
10808	6208	4600	0.05	5	1	1	78	43	0.523592	113	0	300	19
10395	8845	1550	0.4	2	1	1	104	6	0.562905	122	0.309104	198	36
19725.61	6066.61	13659	0.35	2	0	0	54	19	0.683135	122	0.161127	358	32
8980	8680	300	0.51	2	0	0	55	19	0.683135	126	0.161127	358	32
24066.61	6066.61	18000	0.4	3	0	0	54	19	0.683135	113	0.161127	369	35
27200	13050	14150	0.3	2	0	0	52	18	0.503021	113	0.197115	229	31
38032	13688	24344	0.3	5	0	0	51	18	0.503021	113	0.197115	229	31
11766.61	6066.61	5700	0.15	3	0	0	61	15	0.558142	122	0.265801	301	48
24296.61	6066.61	18230	0.2	2	0	0	58	15	0.628627	122	0.290552	394	47
11641.61	6066.61	5575	0.16	3	0	0	83	23	0.542759	80	0.196754	104	50
18035.61	6066.61	11969	0.45	1	0	0	51	23	0.709207	110	0.215955	98	46
7170	2950	4220	0.2	1	1	0	92	22	0.58392	117	0.216866	118	46
7720	4900	2820	0.2	3	0	0	51	23	0.58392	113	0.216866	106	46
25656.61	6066.61	19590	0.47	2	0	0	87	23	0.724049	80	0.254894	121	46
64326.61	6066.61	58260	0.03	2	0	0	68	22	0.488997	126	0.23106	152	43
38846.61	6066.61	32780	0.4	1	1	1	51	23	0.709207	110	0.215955	98	46
11801.61	6066.61	5735	0.5	2	0	0	75	23	0.800333	126	0.315638	99	23
9766.61	6066.61	3700	0.3	2	0	0	90	23	0.777825	131	0.311453	89	42
3250	2700	550	0	1	1	1	105	22	0.427966	108	0.183307	80	46
17416.61	6066.61	11350	0.21	3	0	0	76	23	0.735541	113	0.331109	97	22
12645	2900	9745	0.3	3	1	0	51	26	0.712203	88	0.201007	99	42
13165	1395	11770	0.03	2	0	0	79	16	0.693421	142	0.314707	421	14
15170	7000	8170	0.03	3	0	0	133	16	0.693421	143	0.314707	421	14
7085	2000	5085	0.04	4	0	0	80	16	0.811035	136	0.237526	416	30
7500	7500	0	0.1	3	0	1	155	103	0.457593	154	0.0138507	198	68
8123	3970	4153	0.32	3	0	0	75	28	0.795081	129	0.0422042	95	47
200	0	200	0.17	2	1	1	165	19	0.442654	166	0.0203535	68	55
1630	1170	460	0.1	2	1	0	864	46	0.442654	179	0.0203535	96	45
809	679	130	0.15	3	0	1	93	33	0.442654	127	0.0203535	80	49
80	0	80	0	4	1	1	149	30	0.370732	169	0.0230366	56	65
250	0	250	0	2	0	0	194	63	0.0417809	263	0.0041019	54	230
1200	0	1200	0.6	2	1	1	117	17	0.264473	182	0.0256328	122	106
1100	500	600	1	2	1	0	85	41	0.446548	117	0.0527632	126	134
5587	4787	800	0.4	1	1	1	93	40	0.114939	151	0.199001	79	114
5500	0	5500	0.1	2	0	1	122	83	0.52709	141	0.0613	164	221
5188	1638	3550	0.15	1	0	0	157	25	0.497587	199	0.0129625	115	42
14692	6392	8300	0.3	2	1	1	197	29	0.680066	119	0.021355	158	13
1990	1990	0	0	2	1	1	80	35	0.126293	154	0.0175745	211	243
11847	11232	615	0.07	3	0	1	42	93	0.243286	85	0.0635233	310	143
7055	3230	3825	0	5	1	1	86	17	1.84422	123	0.0474858	109	134
32100	21900	10200	0.61	2	1	1	105	3	0.810064	164	0.0261973	342	67
33150	15100	18050	0.53	4	1	1	109	1	0.668693	185	0.0125108	202	71
60100	25800	34300	0.64	2	0	1	90	0	1.03119	225	0.0642923	207	44
1864	1864	0	0	2	0	1	194	73	0.708736	213	0.0207412	219	358
6799.58	6309.58	490	0	4	1	0	131	93	0.506063	224	0.0130149	238	385
6420	2700	3720	0.03	2	0	0	112	27	0.930862	123	0.543899	130	25
17330	11930	5400	0.2	2	1	0	520	61	0.767347	415	0.115187	86	45
15780	13380	2400	0.36	3	0	1	123	1	0.508418	142	0.0620794	217	58
24452	18440	6012	0.73	3	0	0	99	2	0.968658	141	0.0989192	201	34
14490	6780	7710	0.12	3	0	0	108	42	0.266368	178	0.0770862	207	109
11005.58	6309.58	4696	0.25	2	1	0	41	28	0.29884	125	0.0137845	136	78
19275	10345	8930	0.38	4	1	1	75	27	0.471494	130	0.0177297	289	57
10614.58	6309.58	4305	0.48	3	1	0	109	26	0.543517	123	0.101807	340	77
6400	6100	300	0.27	3	0	1	52	28	0.471494	121	0.0177297	289	57
17441.58	6309.58	11132	0.52	3	1	0	96	26	0.581182	134	0.117378	386	58
18220	13345	4875	0.22	2	1	0	115	26	0.428781	163	0.0478043	386	58
21500	17000	4500	0.51	4	1	0	101	25	0.511178	157	0.0587462	389	77
6946	2616	4330	0.03	3	1	0	115	27	0.171299	139	0.0430821	136	96
9400	4100	5300	0.35	2	1	0	80	39	0.425945	154	0.04466	383	102
23750	9000	14750	0.25	4	1	0	127	21	0.393768	207	0.144381	395	124
13120	7235	5885	0.7	4	1	0	104	27	0.748909	163	0.0912808	121	20
4890	1790	3100	0.2	2	1	1	140	93	0.331654	163	0.0294206	56	82
13649	12600	1049	0.3	5	1	1	127	42	0.343747	124	0.0304814	85	54
16375	7430	8945	0.55	2	1	0	95	7	0.651686	169	0.0555547	85	50
3130	280	2850	0.2	2	0	0	97	29	0.331654	129	0.0294206	42	127
2250	1650	600	0.2	2	1	1	122	93	0.247395	107	0.0401088	42	127
7614	6444	1170	0.45	3	0	1	99	42	0.52207	110	0.032659	98	40
14940	5865	9075	1.3	2	0	0	114	1	0.898653	169	0.129474	121	20
2650	2550	100	0	3	1	0	88	52	0.247395	190	0.0401088	42	127
5160	1780	3380	0.35	2	0	1	83	64	0.353089	193	0.0192182	77	59
6309.58	6309.58	0	0	0	0	0	181	43	0.208475	287	0.0184402	43	135
13800	12000	1800	0.3	3	1	1	97	43	0.585968	166	0.0308928	84	53
10000	8100	1900	0.25	3	0	1	104	31	0.52207	140	0.032659	85	54
22246.58	6309.58	15937	0.4	4	1	1	102	19	0.651686	176	0.0555547	85	50
10432	7967	2465	0.3	2	1	0	90	32	0.232245	142	0.0481191	72	81
12735	5800	6935	0.14	2	0	1	200	23	0.168242	159	0.0184669	126	61
1465	1465	0	0.08	3	0	1	101	18	0.135025	169	0.0131684	151	74
15820	13120	2700	0.48	4	0	1	87	18	0.667758	155	0.046241	332	61
8253	7593	660	0.23	2	0	0	125	17	0.275347	196	0.018755	159	64
13624.58	6309.58	7315	0.25	1	0	0	140	16	0.305735	181	0.0171302	153	51
18359.58	6309.58	12050	0.45	2	0	0	80	17	0.460537	213	0.0297339	332	61
44413.58	6309.58	38104	0.38	3	1	1	113	17	0.460537	179	0.0297339	265	54
8875	6945	1930	0.8	2	1	0	79	7	0.133149	139	0.0082626	78	436
10780	5400	5380	0.68	2	0	0	48	7	2.27528	124	0.568014	94	78
1020	0	1020	0.4	1	0	0	118	4	0.713329	51	0.23551	380	14
6250	0	6250	0.28	1	0	0	45	4	0.656837	39	0.243434	262	27
8500	4700	3800	0.75	2	1	0	118	4	0.758947	70	0.304781	380	14
20100	6700	13400	0.55	4	1	1	118	4	0.758947	61	0.304781	380	14
20353	17938	2415	0.25	3	1	1	122	20	0.607162	176	0.266151	216	41
4550	2100	2450	0.4	3	1	0	122	13	0.637972	187	0.265945	168	27
27998	7450	20548	0.9	4	0	1	129	73	0.637972	201	0.265945	220	16
1450	950	500	0.12	4	0	0	108	56	0.800278	153	0.244252	250	14
8274.05	3502	4772.05	0.5	2	0	1	103	73	0.873461	117	0.359336	291	12
24500	0	24500	0.9	4	0	1	64	73	1.31832	96	0.451554	341	10
7590	2290	5300	0.15	2	1	0	80	5	0.230006	94	0.182933	52	68
1930	1930	0	0	4	1	0	80	36	0.23376	147	0.142675	57	57
12058.5	8766	3292.5	0.22	2	1	0	135	193	0.326805	62	0.178217	70	63
1875	0	1875	0.04	1	1	0	76	39	0.215856	137	0.128689	45	67
4400	0	4400	0.06	5	0	0	64	39	0.29362	91	0.176572	48	59
2780	0	2780	0.03	2	1	0	66	39	0.286617	108	0.140149	50	55
3000	0	3000	0.02	2	1	0	50	39	0.286617	94	0.140149	55	52
6838	3393	3445	0.03	3	1	0	62	39	0.286617	108	0.140149	55	52
10055	6160	3895	0.25	2	0	0	80	33	0.490382	103	0.301725	83	44
7740	3290	4450	0.4	3	0	0	114	22	0.594738	153	0.141549	316	31
5280	1180	4100	0.4	2	0	0	136	68	0.594738	178	0.141549	261	24
3058	0	3058	1.8	2	0	0	126	3	0.601195	114	0.257108	113	28
11278	8878	2400	0.4	1	0	0	102	4	0.584004	92	0.241583	94	58
5100	350	4750	0.3	0	0	0	126	71	0.503495	185	0.120747	187	53
13030	11200	1830	0.3	3	1	1	69	28	0.503495	122	0.120747	215	46
1330	650	680	1.2	2	1	1	193	73	0.709092	181	0.119369	396	50
13449	7874	5575	0.75	2	0	0	70	33	0.593278	115	0.101215	354	54
730.4	730.4	0	0.7	2	1	0	123	28	0.709092	114	0.119369	396	50
7370	0	7370	0.6	1	0	0	121	33	0.410881	140	0.0972902	343	60
17945	9260	8685	0.7	3	0	1	94	91	0.553974	150	0.252786	136	114
4600	900	3700	0.45	4	0	0	230	1	0.553974	166	0.252786	131	83
11900	5500	6400	0.65	1	0	0	349	33	0.649115	393	0.185756	125	94
17275	6200	11075	0.55	2	1	0	349	33	0.649115	117	0.185756	125	94
0	0	0	0.6	2	1	0	82	43	0.410881	44	0.0972902	350	62
7770	3100	4670	0.27	4	0	0	77	47	0.205565	154	0.0930035	282	86
18650	12730	5920	1	4	0	0	87	37	0.410881	181	0.0972902	350	62
2900	2900	0	1.5	0	1	1	40	24	0.232952	106	0.0606534	79	256
15805	9505	6300	0.45	2	0	0	64	143	0.232952	57	0.0606534	99	204
39249	25494	13755	0.8	1	0	1	61	23	0.644345	134	0.118876	390	46
2200	0	2200	0.02	2	0	0	81	28	0.196897	104	0.0645433	145	116
5135	5135	0	0.15	4	0	1	61	19	0.670842	163	0.140674	211	41
9890	8090	1800	0.4	3	1	1	145	143	0.671005	158	0.182423	207	65
10840	2940	7900	0.08	2	0	1	142	16	0.199539	285	0.0775771	178	92
2914	1934	980	0.19	1	0	1	75	83	0.0890608	147	0.0110098	227	85
4265	3215	1050	0.25	2	0	1	210	143	0.0980682	187	0.0166975	259	65
3890	1840	2050	0	2	0	0	262	21	0.351786	304	0.0783534	94	51
1040	1040	0	0	1	1	1	54	19	0.178822	138	0.0098905	30	166
11450	6750	4700	0.15	3	0	1	195	22	0.541646	112	0.148505	114	45
3350	0	3350	0	2	1	0	47	23	0.238764	146	0.020874	38	101
920	920	0	0	4	1	0	103	21	0.065937	160	0.0258383	80	898
2000	2000	0	0.15	4	0	0	49	18	0.354062	134	0.0279204	91	55
10000	3500	6500	0.18	2	0	0	51	18	0.354062	134	0.0279204	77	92
11940	4700	7240	0.4	2	1	0	192	22	0.590109	163	0.162405	135	45
44263	12263	32000	0.4	5	1	1	48	23	0.579615	120	0.0424078	90	47
1970	1970	0	0.2	2	0	0	68	19	0.497677	103	0.0309779	100	49
8220	7900	320	0.1	4	0	0	104	22	0.408321	118	0.034249	96	47
7000	6000	1000	0.25	3	1	1	46	22	0.530025	99	0.0210517	92	54
5500	0	5500	0.4	2	0	0	79	19	0.720142	114	0.0828916	104	46
2100	0	2100	0.05	4	1	1	142	18	0.376278	213	0.0678795	96	41
3645	3500	145	0.05	4	0	1	83	18	0.171616	208	0.0690469	76	63
2700	2450	250	0.1	2	1	1	120	22	0.408321	142	0.034249	86	53
3125	625	2500	0.15	1	1	1	178	73	0.661303	182	0.22011	106	17
26129	17629	8500	0.5	4	1	1	146	35	1.01834	210	0.332239	179	11
7030	3530	3500	0.5	2	1	0	57	20	0.762678	177	0.29453	183	22
35930	20230	15700	0.3	3	0	1	91	31	0.615252	140	0.234232	104	20
19780	12180	7600	0.4	2	1	0	103	36	0.648245	130	0.292873	123	31
8422	500	7922	0	0	0	0	115	23	0.510376	123	0.223113	101	43
17065	11065	6000	0.5	5	0	0	106	23	0.653718	134	0.272908	142	14
3965	3965	0	0.3	2	1	0	97	29	0.56523	134	0.232105	107	16
8983	5783	3200	0.3	4	1	0	133	29	0.56523	148	0.232105	138	20
23294	11294	12000	0.6	3	0	0	128	1	0.917245	243	0.445875	125	15
15479	9804	5675	0.6	3	0	0	144	31	0.917245	257	0.445875	120	14
5890	5040	850	0.35	3	0	0	83	20	0.708772	128	0.305137	162	12
8044	3560	4484	0	4	0	0	62	20	0.707699	128	0	136	12
18025	7075	10950	0.35	2	0	0	82	20	0.707699	128	0.345632	136	12
21050	15600	5450	0.4	4	0	0	85	20	0.708772	128	0.305137	158	12
12895	5995	6900	0.47	4	0	0	81	20	0.708772	147	0.305137	163	10
12750	10250	2500	0.4	4	0	0	97	20	0.663789	138	0.265697	104	25
14235	5535	8700	0.4	4	0	0	77	18	0.668029	81	0.282793	110	12
23190	17050	6140	0.4	5	0	0	83	18	0.668029	81	0.282793	115	14
23467.5	12217.5	11250	0.34	1	0	0	75	22	0.492936	75	0.216807	90	44
14465	7715	6750	0.45	3	0	1	181	20	0.492936	200	0.216807	87	46
10420	6060	4360	0.4	2	1	0	53	22	0.438551	122	0.200108	85	46
12960	10510	2450	0.4	3	0	0	53	22	0.438551	137	0.200108	102	47
13140	9740	3400	0.5	4	1	1	131	23	0.643666	125	0.164648	165	34
47500	0	47500	0.5	3	0	0	95	20	0.520694	189	0.263014	93	44
19238	12238	7000	0.5	4	1	0	69	22	0.492936	207	0.216807	87	46
21280	15780	5500	0.65	3	0	1	138	25	0.759895	248	0.197195	126	13
38780	15925	22855	0.45	3	0	1	65	23	0.649337	60	0.181054	118	18
39412.16	36512.16	2900	0.5	1	0	0	67	23	0.649337	60	0.181054	118	18
2420	1960	460	0.07	3	0	0	136	25	0.520055	172	0.196789	97	40
4900	3400	1500	0.4	1	1	1	103	25	0.592246	159	0.195235	107	36
8400	4150	4250	0.3	3	0	0	105	25	0.534509	168	0.217908	117	37
19605	15525	4080	0.48	2	1	0	164	24	0.61071	205	0.202025	118	21
33532	26782	6750	0.37	2	0	1	106	28	0.573522	162	0.217587	115	36
20885	13685	7200	0.43	2	0	1	68	28	0.61071	185	0.202025	114	15
13742.5	12217.5	1525	0.4	1	1	0	87	33	0.520262	93	0.281739	103	37
17060	7460	9600	0.6	2	0	1	99	20	0.764268	147	0.239029	111	12
8080	5450	2630	0.5	3	0	0	91	47	0.675746	181	0.229861	280	10
7500	4000	3500	0.8	0	0	0	268	33	0.737206	163	0.195918	211	10
14739	4050	10689	0.55	2	1	0	118	26	0.692008	148	0.310336	296	10
24520	8910	15610	1.1	1	0	1	79	88	0.97617	188	0.448102	226	10
45440	32410	13030	1.12	3	0	0	98	88	0.97617	163	0.448102	226	10
39289	24264	15025	0.9	4	0	1	115	88	0.97617	206	0.448102	226	10
36155	10901	25254	0.65	5	1	1	574	57	1.27388	574	0.153118	242	11
42650	21600	21050	0.6	2	0	1	107	28	1.0609601	146	0.209637	153	13
14576	8579	5997	0	0	0	1	170	63	0.140975	322	0.0626595	107	51
17721.5	12217.5	5504	0.41	1	0	1	674	63	0.686491	220	0.135161	110	49
20768.5	12217.5	8551	0.7	2	0	0	70	63	1.5865	210	0.533697	179	13
5900	0	5900	0	2	0	0	69	42	1.1067801	144	0.344552	129	30
14512.5	12217.5	2295	0.06	2	0	1	110	14	0.534787	217	0.179503	152	27
9635	6260	3375	0.72	1	0	1	125	43	0.906249	178	0.286521	303	10
16759	9431	7328	0.69	5	0	0	64	113	0.862185	253	0.248809	205	15
24662.5	13890	10772.5	0.45	1	1	1	76	35	0.780746	210	0.332267	152	18
20801	15316	5485	0.78	3	0	0	122	11	0.955347	276	0.168633	314	10
19065	12465	6600	0.9	3	0	0	80	40	1.5830899	132	0.277006	462	9
3800	3300	500	0.9	2	0	0	180	73	0.679637	234	0.289798	127	11
3750	0	3750	1.85	2	1	0	66	63	1.5865	162	0.533697	157	17
10992	4892	6100	0.4	3	1	1	232	5	0.219959	204	0.0331907	103	54
14597	0	14597	0.85	1	1	0	60	43	1.00409	99	0.234679	142	12
30675	16195	14480	0.9	2	1	0	100	43	1.00409	89	0.234679	142	12
23725	10625	13100	0.75	1	0	1	70	39	1.14459	129	0.311275	138	10
29162	0	29162	0.76	3	1	0	246	35	1.1919	255	0.360483	137	16
22728	16933	5795	0.66	3	0	1	69	38	1.07662	119	0.317541	154	10
8440	2440	6000	1.8	2	1	1	103	30	0.891662	162	0.435123	263	10
14080	9380	4700	0.35	3	1	1	304	60	0.770447	401	0.27261	263	14
3750	0	3750	0.61	2	0	1	132	16	1.33117	214	0.395026	208	10
10515	6125	4390	0.4	4	0	1	157	158	1.15347	287	0.406799	207	11
13450	3300	10150	0.47	2	1	1	47	73	1.28025	170	0.31184	166	10
2800	2500	300	0.14	0	1	0	168	21	1.0051	262	0.225483	174	10
8030	2030	6000	0.3	2	0	0	88	63	1.43616	88	0.564951	201	10
5800	4050	1750	0.6	2	0	1	164	73	1.43616	179	0.564951	221	10
15600	250	15350	0.5	2	1	1	36	63	1.43616	84	0.564951	221	10
800	0	800	0.07	1	0	0	143	143	0.522708	60	0.269061	164	39
8200	5500	2700	0.5	1	1	0	49	13	1.18303	40	0.297528	244	10
1350	600	750	0.05	1	0	1	153	5	0.424517	106	0	138	32
40608	26563	14045	0.55	2	0	1	111	0	1.48956	176	0.424109	256	10
45900	33700	12200	0.4	2	0	1	276	3	1.29258	72	0.0436751	256	8
14780	10480	4300	0.8	3	1	1	265	28	1.35945	72	0.0952666	154	12
11215	0	11215	0.7	5	0	1	265	28	1.35945	72	0.0952666	154	12
24390	23090	1300	0.25	2	1	1	277	33	0.74991	304	0.0420374	135	84
0	0	0	0	0	0	1	212	35	0.552734	229	0.0139828	172	72
2451	0	2451	0.1	2	0	1	246	36	0.645284	284	0.0236761	217	152
9710	9230	480	0.4	4	1	1	282	19	0.792727	282	0.0310433	268	46
4400	1400	3000	0	1	0	1	212	19	0.615272	369	0.0218317	301	50
64434.5	19434.5	45000	0.3	1	1	1	203	16	0.652754	294	0.0208163	236	50
12250	7150	5100	0.65	2	0	0	62	0	0.924736	69	0.04853	151	48
2518.5	1268.5	1250	0.7	2	0	0	61	0	0.925131	69	0.0647156	141	46
1268.5	1268.5	0	0.7	2	0	0	63	0	0.924736	69	0.04853	151	48
16559	11809	4750	0.6	3	0	0	114	43	1.07151	238	0.316437	298	10
4000	1775	2225	0.2	1	1	1	78	26	1.22808	943	0.21151	188	27
8271	6021	2250	1	2	1	1	117	13	1.2920901	165	0.0886664	433	18
10906	9856	1050	0.2	3	1	1	73	45	1.30651	126	0.192888	639	50
3911	3911	0	1.33	2	1	1	79	43	2.0002799	154	0.39279	482	130
3085	1325	1760	0.6	4	1	0	93	15	2.03984	143	0.0624178	562	82
8330	0	8330	1.8	1	0	0	121	0	1.00638	230	0.0547785	277	27
15685	8890	6795	1.7	0	1	0	108	14	1.00638	183	0.0547785	248	17
2600	0	2600	0	2	1	1	113	63	1.22138	191	0.105269	228	30
2180	2180	0	0.2	4	1	0	134	22	0.588899	114	0.0230329	129	102
5169	3720	1449	0.77	3	1	1	78	34	0.196381	142	0.062842	106	76
21634	20134	1500	2	2	1	0	75	31	0.826406	124	0.0244362	285	45
22833	9000	13833	2	2	1	1	109	28	0.826406	158	0.0244362	285	45
18295	4310	13985	0	2	1	1	60	39	0.486403	116	0	323	31
6348	2520	3828	0.2	2	0	1	115	7	0.671414	128	0.0128941	168	49
3700	2000	1700	1.2	2	1	1	92	22	0.0994091	154	0.014312	193	114
3000	0	3000	0	4	0	1	156	14	0.739041	215	0.0673762	146	17
10300	2000	8300	1	0	1	1	77	70	0.617062	112	0.0419919	212	56
