# Supplementary material for: Multi-variable flood damage modelling with limited data using supervised learning approaches
Source: Copernicus journal article supplement (doi:10.5194/nhess-17-1683-2017), 2017-09-29
Supplement: Supplementary file 2 [file nhess-17-1683-2017-supplement.zip › Meuse data/train_data.csv]

Total damage	Structure damage	Content damage	Water depth	Inhabitants	Basement	Detached	footprint	Construction age	Water depth model	Living area	Flow velocity	Duration	Return Period
1855	1855	0	0.1	4	0	1	315	193	2.1356399	249	0.544809	436	20
14520	13220	1300	1	5	1	1	175	19	0.936971	364	0.0233844	204	10
3750	0	3750	0.2	3	1	1	71	31	0.490244	124	0.122919	276	40
24091	11590	12501	2.85	1	1	1	238	63	1.5605	549	0.378054	709	10
32055	28555	3500	2.65	3	1	1	297	47	1.44916	157	0.327414	478	10
23484	18054	5430	2.42	3	1	1	130	17	1.37834	195	0.135021	515	10
21855	19015	2840	2.1	2	1	1	284	93	1.22304	258	0.259401	300	10
3264	0	3264	0	3	0	1	1030	17	0.501513	979	0.0709795	196	25
12630	3330	9300	0.3	2	1	1	131	20	1.31425	218	0.178927	368	10
16849	15229	1620	0.07	4	0	1	150	33	0.771804	216	0.0481709	241	38
24855	16805	8050	0.3	4	1	1	124	19	1.66778	113	0	551	10
2270	1920	350	0.7	2	1	1	111	8	1.30185	142	0.454455	406	33
3183.8	2783.8	400	0	2	1	0	108	20	0.610487	124	0.108081	331	30
2783.8	2783.8	0	0	2	1	0	70	43	0.577502	119	0.095121	213	38
1250	0	1250	0	2	1	1	116	14	0.472293	200	0.010056	158	67
7400	3400	4000	0.15	2	0	1	87	29	0.577502	130	0.095121	213	38
5957.25	5957.25	0	0.3	0	0	1	208	11	0.709779	215	0.0246233	180	45
12805	7880	4925	0.2	2	1	1	94	17	0.610487	127	0.108081	288	19
3413.8	2783.8	630	0	3	1	1	56	33	0.133144	100	0.0506303	94	118
4680	2880	1800	0.01	3	1	1	76	28	0.357312	120	0.0256773	122	86
7023.8	2783.8	4240	0.05	4	0	0	68	28	0.630322	111	0.128416	145	66
4265	3055	1210	0.2	4	1	0	130	28	0.811392	110	0.116539	145	66
3635	1355	2280	0.02	2	1	1	55	18	0.624821	117	0.0263529	130	57
3604	2514	1090	0.15	3	1	0	142	28	0.679442	109	0.110872	148	77
17364	4790	12574	0.19	3	1	1	82	28	0.811392	110	0.116539	170	26
28047	17897	10150	0.3	6	1	1	118	14	1.03836	150	0.118337	183	24
19563	7530	12033	0.07	4	1	1	61	28	0.630322	126	0.128416	145	66
2783.8	2783.8	0	0	4	0	1	128	48	0.756126	128	0.0812024	171	107
9265.3	2783.8	6481.5	0.1	1	1	0	70	45	0.940211	93	0.2113	267	17
7843.8	2783.8	5060	0.1	1	1	1	72	45	0.876145	120	0.353243	305	12
15455.8	2783.8	12672	0.1	2	1	0	157	24	0.796701	168	0.159563	330	19
5750	1400	4350	2	2	1	0	84	28	1.05501	130	0.238863	292	10
1775	1775	0	0.05	3	1	1	221	93	0.813744	150	0.413838	153	23
10650	8610	2040	0.18	2	1	1	71	39	0.876145	93	0.353243	260	12
5175	1050	4125	0.1	2	1	1	87	16	0.876145	157	0.353243	218	18
9600	3500	6100	0.1	2	1	0	50	39	0.876145	92	0.353243	260	12
18543.8	2783.8	15760	0.6	3	1	0	162	28	1.05501	138	0.238863	292	10
16870	7270	9600	0.1	2	1	0	174	39	0.813744	79	0.413838	157	30
13360	6310	7050	0.2	5	0	1	174	39	0.876145	88	0.353243	157	30
22725	17275	5450	0.6	2	1	0	156	10	0.999991	152	0.358457	280	11
12455	8855	3600	0.15	2	1	1	111	37	0.477324	178	0.149653	352	30
2178	1023	1155	0.02	2	0	1	78	38	0.312888	112	0.101098	227	45
0	0	0	0.4	1	1	1	96	44	1.4194	190	0.300875	508	16
51410	31710	19700	0.25	5	1	1	145	34	1.4194	139	0.300875	625	11
14280	4430	9850	0.15	3	1	1	128	88	0.363061	178	0.0689614	189	49
13654	7479	6175	0.71	2	1	1	93	29	1.538	170	0.343158	625	11
6320	3350	2970	0.2	1	1	0	125	60	1.538	135	0.343158	412	21
6400	2050	4350	0.3	3	0	1	92	16	1.69446	135	0.328919	556	11
33950	13550	20400	0.2	5	1	1	78	34	1.538	108	0.343158	412	21
7290	5065	2225	0.3	1	1	1	156	68	1.06291	320	0.0354276	313	24
37319.25	36319.25	1000	0.02	1	1	1	76	33	1.11736	91	0.32833	495	18
2350	1250	1100	0	2	1	1	418	67	1.45919	158	0.274822	755	10
8070	5115	2955	0.18	4	1	1	126	24	1.48698	143	0.218421	463	13
2077.5	1500	577.5	0.05	4	0	1	453	193	1.03304	180	0.270635	194	20
1175	725	450	0	2	1	1	148	47	2.4901099	150	0.02966	246	41
13043.6	2783.8	10259.8	0	2	1	1	118	47	2.4901099	149	0.02966	246	41
2455	1280	1175	0	4	1	1	141	58	0.835425	261	0.136881	324	62
3296	1780	1516	0	2	1	0	90	18	0.757186	152	0.187638	273	27
3780	3380	400	0.5	2	0	1	204	93	0.966237	308	0.0714319	280	49
2985	1485	1500	0.01	4	1	1	179	63	0.906356	259	0.115375	349	24
3343.8	2783.8	560	0	4	1	1	343	23	0.510284	193	0.317681	252	35
3538.8	2783.8	755	0.01	2	1	1	117	46	0.71187	155	0.0923212	224	16
29115	26785	2330	0.3	3	1	1	105	21	0.720972	158	0.262058	403	20
10330	3100	7230	0.08	1	1	1	144	79	0.619249	210	0.17989	159	40
3260	2200	1060	0.2	2	1	1	113	92	1.28348	131	0.277717	256	60
12284	7624	4660	0.3	2	1	1	104	92	1.33808	108	0.16549	297	15
29185	28225	960	0.28	0	0	1	102	19	0.883208	167	0.210692	429	48
6740	6340	400	2	2	1	1	248	41	0.733176	233	0.157645	347	41
1216	1216	0	0	1	1	1	238	92	0.350805	300	0.330968	166	56
13176	10566	2610	0.2	0	1	1	223	21	0.487814	336	0.0693785	225	44
10430	5780	4650	0.3	3	0	1	128	63	0.40641	167	0.115361	254	49
9533.8	2783.8	6750	0.34	2	1	1	278	69	0.583101	291	0.144861	319	44
7280	4990	2290	0.85	2	1	1	142	25	0.583101	238	0.144861	386	49
11007.8	2783.8	8224	0	1	1	0	64	45	0.254748	103	0.178985	145	56
10260	4460	5800	2.2	1	1	1	108	57	0.798767	149	0.144398	300	47
24874	5504	19370	1.25	5	1	1	60	38	0.798767	146	0.144398	377	47
14340	4400	9940	0.05	2	1	1	77	43	0.71686	111	0.243665	279	49
9711.8	2783.8	6928	0.15	4	1	0	128	33	1.48057	171	0.278473	350	14
4874	2154	2720	0	2	1	1	71	68	1.0184799	108	0.285335	333	31
7724	2524	5200	0.18	1	1	1	153	92	1.48057	182	0.278473	392	19
7967	5967	2000	0.04	3	1	0	104	92	1.19401	192	0.152337	350	14
16583	16333	250	0.25	4	0	0	103	68	1.72563	127	0.492297	408	14
825	825	0	0	4	1	1	156	317	0.850643	154	0.140741	287	34
4865	1150	3715	0	1	1	1	317	92	0.850643	354	0.140741	287	34
8533.8	2783.8	5750	0.4	5	0	0	84	37	0.850643	186	0.140741	300	37
11200	7050	4150	0.2	1	1	0	89	92	0.850643	163	0.140741	300	37
6263.8	2783.8	3480	0.3	2	0	0	61	4	2.01477	90	0.430505	410	14
6820	6420	400	0.3	2	1	1	165	143	1.48289	192	0.378555	362	20
1750	1750	0	0.03	6	0	0	80	36	0.469377	101	0.163848	300	42
300	300	0	0	2	0	0	79	36	0.469377	101	0.163848	300	42
6085	3450	2635	0.02	1	1	1	75	33	0.469377	97	0.163848	300	42
5783.8	2783.8	3000	0.35	8	0	1	132	54	2.0171199	190	0.363464	383	21
4908.8	2783.8	2125	0	1	1	0	184	63	0.469377	171	0.163848	245	64
3743.8	2783.8	960	0	2	1	0	99	35	0.469377	108	0.163848	245	64
13883.8	2783.8	11100	0.3	1	0	0	68	4	0.833583	61	0.399213	302	26
12533.8	2783.8	9750	0.3	1	0	0	70	4	0.833583	90	0.399213	302	26
18783.8	2783.8	16000	0.2	1	0	0	64	4	0.833583	61	0.399213	410	14
9413.8	2783.8	6630	0.7	3	1	1	99	43	1.7644399	161	0.325814	502	24
10100	7470	2630	0.7	3	1	1	93	43	1.7644399	124	0.325814	502	24
8783.8	2783.8	6000	0.1	1	0	0	224	45	0.603334	336	0.103318	508	28
23689	11614	12075	0.7	2	1	0	109	92	0.684405	167	0.152815	218	50
6900	4900	2000	0.2	3	1	1	203	33	1.09408	139	0.337885	264	10
8910	4150	4760	0.15	4	1	1	86	31	0.872661	124	0.183606	257	11
4000	2500	1500	0.2	1	1	1	108	27	0.873141	146	0.188275	248	10
1091	591	500	0	2	1	1	111	37	0.801036	135	0.0172041	253	11
2364	1264	1100	0	1	1	1	99	42	0.738693	125	0.160835	253	12
13000	8000	5000	0.2	2	1	1	104	17	0.872661	165	0.183606	293	10
19500	12500	7000	0.2	2	1	1	93	58	0.872661	168	0.183606	245	11
31962	15162	16800	0.41	4	1	1	211	26	1.09408	125	0.337885	304	10
8500	1500	7000	0.1	2	1	1	5587	46	0.850536	310	0.0232002	317	23
6200	3100	3100	0.2	4	1	1	101	2	1.1208	357	0.345718	426	10
10958.8	2783.8	8175	0.1	1	1	1	143	53	0.702868	162	0.0617704	253	41
6500	6500	0	0.05	4	1	1	6543	108	0.700885	231	0.0500838	279	28
42607	26665	15942	0.5	3	1	1	133	93	1.5372601	184	0.288702	335	10
8700	6700	2000	0.2	1	0	1	111	73	1.28803	175	0.0203214	208	90
9373.8	2783.8	6590	0.1	2	0	0	58	4	0.530689	91	0.255724	260	38
4133.8	2783.8	1350	0.3	1	0	0	61	9	1.40753	60	0.072975	148	12
10783.8	2783.8	8000	0.3	2	0	0	62	9	1.40753	67	0.072975	148	12
9483.8	2783.8	6700	0.3	1	0	0	60	9	1.40753	56	0.072975	160	21
8183.8	2783.8	5400	0.2	1	0	0	62	4	0.833583	88	0.399213	302	26
5183.8	2783.8	2400	0.12	2	0	0	62	9	0.662713	56	0.0767964	141	33
11015.8	2783.8	8232	0.29	2	0	0	64	4	1.0184799	88	0.285335	318	29
5873.8	2783.8	3090	0.08	1	0	0	63	9	0.373395	56	0.185024	149	49
8182.51	2783.8	5398.71	0.1	1	0	0	71	4	0.530689	58	0.255724	318	29
6183.8	2783.8	3400	0.12	1	0	0	58	4	0.530689	88	0.255724	260	38
8338.8	2783.8	5555	0.1	2	0	0	53	4	0.374035	59	0.30515	302	26
8033.8	2783.8	5250	0.1	1	0	0	60	4	0.374035	88	0.30515	237	43
7483.8	2783.8	4700	0.3	1	0	0	62	9	1.40753	67	0.072975	148	12
6183.8	2783.8	3400	0.1	2	0	0	62	9	0.373395	67	0.185024	152	37
7283.8	2783.8	4500	0.1	1	0	0	59	9	0.373395	60	0.185024	152	37
7183.8	2783.8	4400	0.08	1	0	0	58	9	0.373395	71	0.185024	237	43
11083.8	2783.8	8300	0.2	1	0	0	63	9	0.662713	71	0.0767964	141	33
15283.8	2783.8	12500	0.3	1	0	0	72	9	1.10715	78	0.0462755	144	17
12483.8	2783.8	9700	0.2	1	0	0	64	9	0.662713	71	0.0767964	141	33
12883.8	2783.8	10100	0.3	2	1	1	69	9	1.10715	78	0.0462755	141	33
13193.8	2783.8	10410	0.15	1	0	0	62	9	0.662713	67	0.0767964	141	33
6333.8	2783.8	3550	0.15	2	0	0	98	20	0.749467	160	0.142282	155	47
6333.8	2783.8	3550	0.4	4	1	0	293	281	0.8702	206	0.104492	193	28
11313	4198	7115	0.18	2	1	1	1030	14	0.806758	962	0.194445	182	25
17533.8	2783.8	14750	0.4	3	0	0	221	92	0.8702	353	0.104492	193	28
25700	5350	20350	0	9	1	1	1048	93	0.44316	426	0.190569	193	69
8951	4375	4576	0.38	2	1	1	267	16	0.937045	201	0.0870421	206	78
19105	14965	4140	0.3	4	1	0	263	63	0.758652	320	0.0708449	566	50
10525	5750	4775	0.3	1	1	1	92	32	0.719511	171	0.134568	217	52
10685	8020	2665	2	4	1	1	380	44	1.74296	85	0.447039	411	47
10510	6310	4200	0.25	2	1	0	100	34	0.443802	148	0.103212	565	50
19934	0	19934	0.38	4	1	0	190	20	0.525824	216	0.150996	485	50
5058	3218	1840	2	4	1	1	119	94	1.17145	172	0.504615	432	47
16150	0	16150	0.18	2	1	1	81	34	0.443802	133	0.103212	565	50
4345	1405	2940	0.4	1	1	0	126	94	1.17145	129	0.504615	432	47
26700	8100	18600	0.38	2	1	0	185	33	0.525824	208	0.150996	529	50
850	850	0	1.5	3	1	0	156	1	0.740586	215	0.0980114	381	50
5755	1800	3955	0.18	2	1	1	100	26	0.425089	123	0.144971	393	50
5250	850	4400	0.51	2	0	1	155	33	0.744569	83	0.197315	377	45
8511	6555	1956	0.06	5	1	1	847	73	0.698856	228	0.175039	416	49
1860	0	1860	0.3	1	0	0	191	8	0.414412	139	0.0746724	127	50
1430	854	576	0.13	2	0	0	105	7	0.320943	147	0.107217	167	50
2013	1453	560	1.7	0	0	0	102	8	0.414412	158	0.0746724	155	50
7210	3285	3925	0.2	4	0	0	55	4	0.358284	102	0.107738	165	50
4782	4782	0	0.21	2	0	0	66	4	0.358284	102	0.107738	165	50
5549	2559	2990	0.16	4	0	0	98	8	0.358284	157	0.107738	155	50
15499	9474	6025	0.31	5	1	0	97	8	0.414412	125	0.0746724	182	50
4910	1310	3600	0.15	4	0	1	55	4	0.327687	107	0.114153	190	50
8159	3802	4357	0.2	4	0	0	88	8	0.358284	125	0.107738	165	50
3555	0	3555	0.2	2	0	0	56	4	0.358284	102	0.107738	190	50
4000	4000	0	0.15	4	0	0	49	7	0.253019	94	0.0515398	237	50
20535	3900	16635	0.15	1	0	0	97	5	0.432989	157	0.0556091	196	50
2610	1935	675	0.15	3	0	0	101	5	0.432989	156	0.0556091	205	50
4985	1930	3055	0.14	4	0	0	71	5	0.414412	132	0.0746724	205	50
5000	925	4075	0.15	1	0	0	70	5	0.432989	132	0.0556091	205	50
2610	0	2610	0.1	2	0	0	75	4	0.375443	121	0.0514659	230	50
2990	2990	0	0.02	3	0	0	62	4	0.375443	102	0.0514659	230	50
2813	1313	1500	0.15	4	0	0	71	5	0.414412	135	0.0746724	196	50
4085	2435	1650	0.4	1	1	1	126	38	0.849428	175	0.439961	288	25
2445	0	2445	0.28	2	1	0	361	94	0.698126	65	0.14251	379	41
7920	5000	2920	0.1	2	1	0	81	30	0.660215	166	0.45195	379	41
25610	19310	6300	0.2	2	1	1	175	35	0.66461	227	0.219554	318	36
14855	13355	1500	0.2	3	1	0	216	61	0.66461	333	0.219554	290	42
19568	9150	10418	0.1	3	1	0	107	30	0.660215	116	0.45195	379	41
13884.27	6184.27	7700	0.25	1	1	0	90	55	0.698126	134	0.14251	379	41
10163	8372	1791	0.3	4	1	1	131	94	0.698126	205	0.14251	379	41
17330	0	17330	0.8	1	0	0	89	43	0.746244	183	0.0404935	386	45
13675	4050	9625	0.06	1	1	0	124	45	0.660215	171	0	327	36
13199	10800	2399	0.1	2	1	1	124	45	0.660215	171	0.45195	327	36
12060	10460	1600	0.3	2	1	1	439	5	1.15964	322	0	467	52
10630	7760	2870	0.3	4	1	1	439	5	1.15964	322	0	467	52
55282	40102	15180	0.7	6	0	0	439	5	1.15964	322	0.169825	467	52
644	0	644	0	2	1	1	132	18	0.162097	51	0	330	61
14064.27	6184.27	7880	0	1	1	1	132	18	0.162097	51	0	330	61
15000	3000	12000	0	4	1	1	132	18	0.162097	51	0	330	61
7100	3000	4100	0	2	1	1	132	18	0.162097	51	0	330	61
9375	3775	5600	0.1	3	1	1	132	18	0.162097	51	0.0268901	330	61
6150	0	6150	0.25	4	0	0	165	94	1.60567	226	0.200094	627	10
6075	0	6075	0.35	2	0	0	92	94	1.60567	162	0.200094	631	11
2230	0	2230	0.4	2	0	1	56	94	1.45464	208	0.210232	250	26
7164	6184	980	2.5	3	0	0	112	94	1.45464	231	0.210232	207	59
17900	7700	10200	0.1	2	1	1	112	15	1.20305	185	0.230555	299	17
9525	5505	4020	0.15	2	0	1	155	25	1.20305	198	0.230555	220	51
8170	8070	100	0.05	5	1	1	234	94	0.915731	356	0.110157	152	239
4060	2960	1100	0	2	1	0	126	33	0.661211	293	0.114068	152	239
1120	0	1120	0	2	1	1	142	73	0.0699654	320	0.0182117	220	72
2700	2700	0	1.5	2	0	1	113	33	0.136943	146	0.0297308	112	217
1175	675	500	0	1	1	1	192	21	0.877566	238	0.263667	557	90
1200	1200	0	0	0	1	1	169	82	0.78668	243	0.184707	334	50
2950	2950	0	0.04	2	1	1	369	73	0.974101	345	0.10602	165	140
3010	0	3010	0.1	3	1	1	2902	83	1.60374	40	0.143971	227	56
894	0	894	0	4	1	1	303	94	0.758635	339	0.101844	149	51
9175	1675	7500	0	2	1	1	173	90	0.647503	262	0.0814597	137	220
16210	9210	7000	0.3	2	1	1	76	41	1.25404	122	0.23832	260	10
15600	8800	6800	0.5	2	1	1	477	23	1.38333	77	0.26493	319	9
11190	0	11190	0.5	2	1	1	209	38	1.30887	317	0.420016	344	29
20740	13240	7500	0.6	2	0	1	163	13	1.4572901	229	0.459032	358	24
12180	4180	8000	0.3	1	1	1	345	93	1.49043	682	0.580618	370	9
9600	8000	1600	0.4	0	0	1	341	63	2.1998601	243	0.647081	399	8
16420	11220	5200	0.15	3	0	0	85	33	0.23655	131	0.068528	269	50
8825	5450	3375	0.06	4	1	1	380	55	1.38077	252	0.245555	556	10
2252	750	1502	0	2	0	0	152	19	0.250941	183	0.0241916	64	119
500	500	0	0	3	1	1	126	32	0.227776	144	0.0638994	243	85
4520	4520	0	0.75	1	1	1	152	21	0.486021	121	0.0555762	139	81
3725	2000	1725	0	4	1	0	134	23	0.238971	146	0.0115692	10	120
4490	3350	1140	0.15	2	1	0	155	27	0.486021	146	0.0555762	161	55
12520	10900	1620	0.15	2	1	1	137	93	0.486021	180	0.0555762	161	55
12022	5258	6764	0.45	3	0	0	112	138	0.653685	142	0.0354277	139	81
11342	7092	4250	0.45	2	1	0	246	93	0.565498	328	0.0332666	166	72
19865	4900	14965	0.65	2	0	1	63	93	0.653685	92	0.0354277	136	107
3500	3500	0	0	3	1	1	128	29	0.486021	204	0.0555762	147	47
3780	1730	2050	0.1	1	1	1	100	31	0.360565	165	0.0167086	147	283
10265	8950	1315	0.45	2	0	0	99	3	0.398282	129	0.066977	501	114
6200	4280	1920	0.4	2	0	0	91	3	0.360778	116	0.0644371	502	117
4604	615	3989	0.17	2	0	0	100	6	0.205778	85	0.050567	376	94
18235	15930	2305	0.3	2	0	0	105	3	0.360778	102	0.0644371	502	117
9375	5780	3595	0.3	2	0	0	92	6	0.268276	85	0.0789769	495	122
8697.31	6957.31	1740	0.17	2	0	0	73	6	0.205778	85	0.050567	433	84
7495	2215	5280	0.18	2	0	0	104	6	0.205778	85	0.050567	376	94
2405	2405	0	0	4	0	0	127	14	0.177107	130	0.0400626	277	127
6765	6765	0	0.3	2	0	0	84	3	0.268276	109	0.0789769	495	122
1450	750	700	0	3	0	0	88	6	0.173279	114	0.0308747	450	107
10157.31	6957.31	3200	0.08	1	0	0	88	5	0.123284	150	0.0456523	501	163
7535.31	6957.31	578	0.5	2	1	1	172	3	0.618222	223	0.397388	259	153
8700	4900	3800	0.03	4	1	1	156	46	0.326281	233	0.140041	146	42
2095	320	1775	0.1	3	1	1	364	45	0.158267	93	0.133704	88	124
5591	5591	0	0	2	1	1	265	72	0.213623	295	0.0313744	99	67
1850	500	1350	0.08	2	1	1	174	94	0.672746	226	0.360256	119	50
15550	12700	2850	0.22	3	0	1	312	113	0.479979	233	0.0249215	121	46
21710	6350	15360	0.96	2	0	0	48	9	0.545239	139	0.122875	195	33
27755.31	11255.31	16500	0.95	2	0	0	124	13	0.859017	183	0.0172451	172	60
20155.31	11255.31	8900	0.35	3	0	0	156	43	0.184985	53	0.0079782	169	90
22055.31	11255.31	10800	0.6	1	1	0	155	45	0.677537	53	0.0265244	169	90
13355.31	11255.31	2100	0	1	1	0	155	45	0.184985	53	0.0079782	169	90
11657	6700	4957	0.25	1	1	0	44	42	0.677537	101	0.0265244	163	56
4900	2750	2150	0.3	2	1	0	125	43	0.677537	103	0.0265244	163	56
10800	8400	2400	0.4	2	1	0	125	43	0.677537	88	0.0265244	163	56
20115.31	11255.31	8860	0.85	1	0	0	32	87	0.703892	48	0.0167475	110	54
15520.31	11255.31	4265	0.7	1	0	0	54	42	0.703892	106	0.0167475	126	53
22605.31	11255.31	11350	0.7	2	0	0	62	87	0.703892	89	0.0167475	126	53
23278	23278	0	0	1	1	1	62	73	0.498739	197	0.0232102	110	59
13365.31	11255.31	2110	0.22	1	1	0	125	43	0.677537	79	0.0265244	163	56
17615.31	11255.31	6360	0	2	1	0	444	5	0.963399	88	0.008871	173	47
20710.31	11255.31	9455	2	1	1	0	87	73	0.498739	145	0.0232102	110	59
19000	8750	10250	0.2	0	1	0	80	69	0.498739	145	0.0232102	110	59
9372	7040	2332	1.5	3	0	0	87	64	0.496021	225	0.0594307	396	53
25045.31	11255.31	13790	1.2	1	0	0	84	64	0.496021	183	0.0594307	396	53
9807	9807	0	0.85	0	1	0	275	37	1.09998	88	0.115369	307	20
6855	3525	3330	0.6	1	0	0	281	17	0.963399	349	0.008871	230	28
14405.31	11255.31	3150	0.2	2	1	0	141	28	1.09998	121	0.115369	235	12
13155.31	11255.31	1900	1	2	1	0	1089	10	0.462365	69	0.0333466	230	72
13295.31	11255.31	2040	1.6	1	1	0	1089	10	0.462365	69	0.0333466	230	72
16255.31	11255.31	5000	0	1	1	0	1089	10	0.462365	134	0.0333466	230	72
14055.31	11255.31	2800	2	2	1	0	1089	10	0.462365	69	0.0333466	230	72
18555.31	11255.31	7300	2	1	0	0	1089	10	0.462365	101	0.0333466	230	72
0	0	0	0.2	0	1	0	202	43	0.131644	154	0.0079599	269	47
6500	4500	2000	2	2	1	0	103	8	0.326809	100	0.0165163	77	71
2291.5	2291.5	0	0	2	1	0	78	35	0.596517	66	0.102891	338	51
2100	2100	0	0.4	0	1	0	48	35	0.596517	161	0.102891	338	51
10810	3660	7150	2.2	1	1	0	53	35	0.738517	152	0.0444191	476	77
15850	0	15850	0.5	1	0	0	52	35	0.738517	138	0.0444191	476	77
16400	10850	5550	0.4	2	1	0	85	35	0.596517	52	0.102891	338	51
6350	4200	2150	0.6	3	0	1	115	36	0.726025	111	0.168082	395	50
11460	0	11460	0.64	2	1	0	53	44	0.81084	166	0.0643506	522	50
15422	6822	8600	0.6	4	1	0	115	36	0.726025	115	0.168082	395	50
41428	22128	19300	0.65	2	0	0	50	39	0.81084	126	0.0643506	522	50
2100	0	2100	0.6	0	1	0	152	87	0.515274	98	0.0395019	227	50
7290	0	7290	0.7	2	1	0	234	70	0.593046	253	0.0378793	305	50
10400	7950	2450	0.4	4	1	0	119	87	0.515274	131	0.0395019	227	50
11248.6	0	11248.6	0.85	2	1	0	257	83	0.593046	96	0.0378793	228	50
6900	0	6900	0.5	1	1	0	106	87	0.515274	110	0.0395019	227	50
3000	0	3000	0.01	1	1	0	74	83	0.886399	58	0.0422117	213	50
14991	7670	7321	0.08	2	1	0	76	83	0.886399	63	0.0422117	213	50
15375	11110	4265	0.9	4	1	0	76	83	0.886399	53	0.0422117	213	50
10125.4	7435.4	2690	0	1	1	0	112	83	0.593046	64	0.0378793	385	50
29205	10705	18500	0.65	2	1	0	220	118	0.7203	178	0.148481	475	50
27343	24143	3200	0.45	4	1	0	112	83	0.593046	71	0.0378793	385	50
26880	20730	6150	0.45	2	1	0	84	83	0.593046	175	0.0378793	475	50
19785.4	7435.4	12350	0.48	1	1	0	101	87	0.593046	214	0.0378793	385	50
15385.4	7435.4	7950	0.08	4	1	0	92	87	0.593046	201	0.0378793	385	50
16840.4	7435.4	9405	0.45	3	1	0	112	83	0.593046	83	0.0378793	385	50
38968	18470	20498	0.28	3	1	0	122	87	0.593046	233	0.0378793	385	50
1345	0	1345	0.65	1	0	0	136	38	0.753687	87	0.0750296	276	50
7895	0	7895	0.45	1	1	0	156	53	0.726025	146	0.168082	361	50
10745	0	10745	0	2	1	0	114	34	0.726025	162	0.168082	395	50
8427	0	8427	1	1	1	0	44	88	0.933895	114	0.0445415	197	50
32862	0	32862	1	3	1	0	115	88	0.933895	70	0.0445415	255	50
58750	58750	0	1	1	1	0	115	88	0.933895	74	0.0445415	255	50
2450	0	2450	1.25	2	0	1	202	83	0.933895	89	0.0445415	191	50
5133	4618	515	0.85	2	0	0	191	19	0.961889	89	0.0814479	136	49
2629	0	2629	2.2	2	1	0	74	10	1.0148	74	0.0895419	134	50
800	0	800	1	2	0	0	82	0	0.991992	61	0.0638692	135	50
2590	0	2590	0.4	1	0	0	222	0	0.991992	70	0.0638692	136	50
2565	0	2565	0.8	1	1	0	163	0	0.991992	72	0.0638692	136	50
420	0	420	0	1	0	0	82	0	0.991992	72	0.0638692	135	50
2670	0	2670	2.2	2	1	0	78	10	1.0148	97	0.0895419	140	49
1253	0	1253	1	1	1	0	163	0	0.991992	72	0.0638692	136	50
1260	0	1260	0.5	2	1	0	222	0	0.991992	59	0.0638692	136	50
980	0	980	0.8	0	1	0	82	0	0.991992	72	0.0638692	135	50
1840	0	1840	0.8	2	1	0	222	0	0.991992	70	0.0638692	136	50
1600	0	1600	1	2	0	0	222	0	0.991992	70	0.0638692	136	50
7048	0	7048	0.5	1	1	0	163	0	0.991992	72	0.0638692	136	50
8599	0	8599	0.7	1	0	0	222	0	0.991992	70	0.0638692	136	50
12750	0	12750	0.3	1	0	0	222	0	0.991992	61	0.0638692	136	50
12210	0	12210	1.15	2	0	0	82	0	0.991992	72	0.0638692	135	50
29805	24175	5630	0.61	3	1	0	82	0	0.991992	61	0.0638692	135	50
30348	0	30348	0.65	2	0	0	222	0	0.991992	61	0.0638692	136	50
20100	0	20100	0.55	1	0	0	82	0	0.991992	72	0.0638692	135	50
19210	0	19210	0.64	2	0	0	163	0	0.991992	72	0.0638692	136	50
29952	16900	13052	0	2	1	0	71	41	0.991755	135	0.0348386	130	50
17975	0	17975	0.7	2	0	0	82	0	0.991992	72	0.0638692	135	50
3950	0	3950	0.35	1	1	0	70	78	0.761448	124	0	166	50
10000	0	10000	0.73	1	0	0	170	83	1.09525	133	0.0994112	135	50
14490	9090	5400	0.75	4	1	0	70	83	1.09525	113	0.0994112	135	50
31700	25750	5950	0.45	3	1	0	70	78	0.761448	149	0.0816513	166	50
25100	14400	10700	1.15	2	1	0	130	83	1.09525	132	0.0994112	136	50
28325	26325	2000	0.5	4	1	0	130	83	1.09525	152	0.0994112	136	50
22935	20725	2210	0.2	3	1	0	70	78	0.761448	124	0	166	50
13890	11290	2600	0.4	5	1	0	70	78	0.761448	124	0.0816513	166	50
6974	5024	1950	1.9	2	1	0	74	30	1.17257	111	0.184702	169	50
12665	0	12665	0.4	2	1	0	97	83	0.812922	115	0.0806002	182	50
4370	0	4370	0.8	1	1	0	82	68	1.07074	174	0.0992597	174	50
11435	3935	7500	0.35	4	1	1	65	83	0.812922	115	0.0806002	177	50
14093	0	14093	0.3	2	1	0	50	78	0.761448	46	0.0816513	152	50
13950	9150	4800	0.6	2	1	0	65	30	0.812922	113	0.0806002	177	50
15060	11360	3700	0.35	2	1	0	63	58	0.761448	58	0.0816513	166	50
27620	14395	13225	1.5	1	1	1	84	83	1.17257	116	0.184702	169	50
23876	8788	15088	0.2	2	1	0	50	78	0.761448	46	0	152	50
16395	10995	5400	0.5	3	1	0	73	83	0.812922	120	0.0806002	177	50
15807	0	15807	0.25	2	1	0	50	78	0.761448	46	0	152	50
13800	6200	7600	1	1	1	1	111	83	1.17257	141	0.184702	169	50
2150	0	2150	0.6	1	1	0	94	63	0.895045	148	0.0661598	200	50
4250	2520	1730	0.03	1	1	0	88	87	0.875063	97	0.0979657	147	50
6490	2559	3931	0.03	5	1	0	127	70	0.827625	147	0.0455463	170	50
7000	6000	1000	0.4	0	1	0	78	63	0.876965	151	0.0602005	193	50
10247	6915	3332	0.4	2	1	0	99	78	0.876965	249	0.0602005	181	50
20665	13365	7300	0.85	2	1	0	157	46	0.993737	226	0.0737605	212	50
15590	6640	8950	0.25	2	1	1	105	72	0.876965	138	0.0602005	181	50
13300	0	13300	0.53	1	1	0	138	33	0.876965	94	0.0602005	193	50
14775	9100	5675	0.33	2	1	0	123	73	0.876965	159	0.0602005	181	50
16930	8380	8550	0.6	1	1	0	100	63	0.895045	136	0.0661598	200	50
31220	27450	3770	0.46	3	1	0	138	33	0.876965	102	0.0602005	193	50
17748	6618	11130	0.01	2	1	1	80	67	0.827625	118	0.0455463	147	50
18322	8972	9350	0.65	2	0	0	104	68	0.895045	140	0.0661598	200	50
31884	22876	9008	0.6	2	1	0	95	68	0.895045	136	0.0661598	200	50
26992.32	22117.32	4875	0.4	4	1	0	98	73	0.876965	135	0.0602005	181	50
22888	20888	2000	0.32	5	1	0	77	68	0.876965	122	0.0602005	193	50
3110	0	3110	0.5	3	0	0	116	93	0.74345	132	0.0510955	150	50
9775	6850	2925	0.73	2	0	0	92	83	0.85311	136	0.0842166	155	50
12732	9182	3550	0.55	4	1	0	79	83	0.74345	161	0.0510955	150	50
15485	9760	5725	0.8	4	1	0	61	87	0.875063	79	0.0979657	147	50
14005	6805	7200	0.8	4	1	0	91	83	0.875063	79	0.0979657	147	50
22128	0	22128	0.35	1	1	0	185	81	0.74345	174	0.0510955	150	50
26825	20725	6100	0.8	2	1	0	70	87	0.875063	79	0.0979657	155	50
25478	11278	14200	0.5	3	1	0	143	83	0.74345	197	0.0510955	167	50
22490	20140	2350	0.41	2	0	0	85	90	0.74345	131	0.0510955	150	50
16605	12655	3950	0.8	2	0	0	101	83	0.85311	184	0.0842166	133	50
15824	10644	5180	0.75	3	0	0	78	83	0.85311	159	0.0842166	155	50
37961.25	9361.25	28600	0.8	4	1	0	90	85	0.85311	129	0.0842166	155	50
0	0	0	0.51	0	1	0	83	56	0.651481	156	0.0445043	167	50
1750	0	1750	0.15	2	1	0	89	55	0.418508	171	0.0434871	304	50
13040	10440	2600	0.25	2	0	0	73	56	0.418508	151	0.0434871	221	50
9330	7290	2040	0.5	4	1	0	218	65	0.44421	126	0.0352098	177	51
7552	0	7552	0.28	1	0	0	105	56	0.418508	155	0.0434871	221	50
9288	5968	3320	0.1	4	1	0	77	56	0.418508	152	0.0434871	221	50
7237	4237	3000	0.55	2	1	0	94	58	0.651481	170	0.0445043	167	50
7005	5705	1300	0.06	4	1	0	79	56	0.418508	152	0.0434871	221	50
14680	4380	10300	0.64	3	1	0	67	9	0.808567	170	0.104854	167	50
20524	10895	9629	0.47	3	1	0	123	87	0.44421	190	0.0352098	177	51
21785	17735	4050	0.48	2	1	0	167	63	0.44421	92	0.0352098	177	51
23735	10545	13190	0.51	3	1	0	167	63	0.44421	109	0.0352098	177	51
1800	500	1300	0.48	2	0	0	121	78	1.04419	67	0.029709	136	50
7420	5770	1650	0.3	2	1	0	87	78	1.04419	281	0.029709	147	50
14000	13000	1000	1.3	2	1	0	160	73	1.04419	198	0.029709	147	50
30489	15140	15349	0.3	4	1	0	121	78	1.04419	330	0.029709	136	50
26270	26270	0	0.47	0	1	0	121	78	1.04419	64	0.029709	136	50
5839.66	4339.66	1500	0.8	3	1	0	104	73	1.1508501	306	0.199888	148	49
5639.66	4339.66	1300	0.75	1	1	0	90	78	1.09525	315	0.0994112	142	49
5523	5523	0	0.15	6	1	0	132	72	1.0891401	385	0.0657189	144	50
4060	2160	1900	0	4	1	0	86	83	1.0148	88	0.0895419	140	49
9685	6885	2800	0.7	4	1	0	73	63	1.09525	199	0.0994112	145	49
6539.66	4339.66	2200	0.12	5	1	0	111	73	1.08715	261	0.0704136	144	50
12604	8604	4000	0.12	2	1	0	104	68	1.08715	198	0.0704136	144	50
6425	1770	4655	0	2	1	0	92	83	1.0148	148	0.0895419	140	49
16200	3000	13200	0.6	4	1	0	91	68	1.09525	328	0.0994112	145	49
30280	20430	9850	0.35	2	1	0	67	58	1.0891401	116	0.0657189	145	49
21787	18967	2820	0.1	5	1	0	79	68	1.08715	180	0.0704136	154	49
21700	6700	15000	0.39	1	1	0	124	78	1.0891401	236	0.0657189	145	49
33304	30055	3249	0.2	4	1	0	108	73	1.0891401	105	0.0657189	142	49
19300	11100	8200	0.4	1	1	0	147	90	1.0891401	283	0.0657189	142	49
20600	17600	3000	0.18	2	1	0	78	83	1.0891401	169	0.0657189	142	49
31150	17650	13500	0	2	1	0	114	43	1.0148	187	0.0895419	140	49
1700	1000	700	0.4	3	0	0	70	73	1.07074	108	0.0992597	170	50
5258	5258	0	0.55	7	1	0	124	25	1.07074	112	0.0992597	174	50
3500	0	3500	0.6	4	1	0	91	83	1.1508501	87	0.199888	152	50
7455	1750	5705	0.4	1	1	0	64	83	1.07074	103	0.0992597	170	50
8300	0	8300	0.16	4	1	0	57	83	0.873863	100	0.120324	168	50
11870	5895	5975	0.4	2	1	0	94	25	1.07074	142	0.0992597	170	50
26055	12715	13340	1.12	4	0	0	89	25	1.17257	112	0.184702	170	50
17350	11350	6000	0.95	1	1	0	91	25	1.17257	170	0.184702	170	50
30554.2	12089.2	18465	0.35	4	1	0	72	83	1.07074	103	0.0992597	170	50
15800	12200	3600	0.6	3	0	0	112	25	1.07074	202	0.0992597	170	50
29210	9610	19600	0.9	4	1	0	102	69	1.1508501	40	0.199888	148	49
35720	23460	12260	1	4	1	0	70	83	1.17257	114	0.184702	170	50
20535	12860	7675	0.8	1	1	0	115	83	1.1508501	296	0.199888	152	50
19400	13250	6150	0.94	2	1	0	70	73	1.17257	112	0.184702	170	50
19170	12350	6820	0.4	3	1	0	95	23	1.07074	153	0.0992597	170	50
18119	0	18119	0.85	4	1	0	106	83	1.1508501	304	0.199888	148	49
23050	12175	10875	0.3	5	1	0	59	78	0.873863	94	0.120324	168	50
50991	15945	35046	0.85	3	1	0	91	83	1.1508501	127	0.199888	152	50
48145	23145	25000	1.16	3	0	0	77	83	1.17257	105	0.184702	170	50
50797	20500	30297	0.8	2	1	0	83	83	1.1508501	181	0.199888	152	50
48864	30740	18124	0.01	5	1	0	67	83	0.873863	109	0	168	50
4300	0	4300	0.46	1	0	0	164	9	1.01121	71	0.107368	183	50
7125	0	7125	0	1	1	0	62	12	0.85311	95	0.0842166	129	50
6180	0	6180	0.6	4	0	0	162	9	1.18372	71	0.131848	186	50
10065	0	10065	0.4	2	0	0	164	9	1.01121	71	0.107368	197	50
11962	0	11962	0	2	1	0	73	12	0.85311	95	0.0842166	140	50
8800	6500	2300	0.25	3	0	0	164	9	1.01121	108	0.107368	197	50
4950	0	4950	0	2	1	0	61	12	0.85311	95	0.0842166	129	50
7060	0	7060	0.55	1	0	0	165	9	1.01955	108	0.0731491	186	50
6031	0	6031	0.6	2	0	0	165	9	1.01955	71	0.0731491	186	50
11105	0	11105	0.5	3	0	0	164	9	1.01121	71	0.107368	197	50
25346	14076	11270	0.3	4	0	0	164	9	1.01121	71	0.107368	197	50
13700	13200	500	0.21	4	0	0	164	9	1.01121	71	0.107368	197	50
13100	9100	4000	0.25	4	0	0	164	9	1.01121	71	0.107368	183	50
17937.5	0	17937.5	0	2	1	0	61	12	0.74345	95	0.0510955	128	50
13199	0	13199	0.8	3	0	0	162	9	1.18372	108	0.131848	186	50
20625	0	20625	0	1	1	0	61	12	0.74345	95	0.0510955	144	50
14340	0	14340	0.6	2	0	0	165	9	1.01955	108	0.0731491	186	50
15280	0	15280	0.5	3	0	0	164	9	1.01121	108	0.107368	197	50
2599	1959	640	0	1	1	0	108	67	0.759331	97	0.0797804	215	50
3400	2400	1000	0.6	1	1	0	108	67	0.759331	40	0.0797804	230	50
4300	0	4300	0	2	1	0	71	61	0.759331	171	0.0797804	232	50
10175	5640	4535	1.8	5	1	0	108	67	0.95785	61	0.0845039	215	50
950	0	950	0	2	1	0	72	34	0.355492	139	0.0284932	159	50
2400	600	1800	0	2	1	0	63	34	0.355492	129	0.0284932	159	50
3727	1213	2514	2	2	1	0	72	31	0.666034	120	0.081136	243	50
4980	1030	3950	1.8	2	1	0	57	34	0.355492	139	0.0284932	159	50
6600	2300	4300	0	1	1	0	59	35	0.30659	137	0.0519266	164	50
2300	1500	800	0.57	4	0	1	105	38	0.761448	96	0.0816513	170	50
1780	1530	250	2	2	1	0	1029	79	0.83909	166	0.0408144	134	50
3725	2750	975	2	1	1	0	54	65	0.448967	141	0.0230337	114	50
3490	2050	1440	2	5	1	0	76	61	0.448967	177	0.0230337	107	52
8000	1800	6200	0.03	2	0	0	74	66	0.448967	188	0.0230337	114	50
750	750	0	0	4	0	0	66	63	0.448967	150	0.0230337	107	52
2000	2000	0	1.7	4	1	0	97	67	0.448967	209	0.0230337	122	50
12600	5200	7400	0.25	2	1	0	61	67	0.448967	143	0.0230337	132	50
5062.5	1762.5	3300	0.2	1	1	0	81	78	0.448967	145	0.0230337	136	50
4000	4000	0	0.15	2	1	0	58	60	0.448967	141	0.0230337	136	50
3182	1372	1810	0.35	6	1	0	72	63	0.448967	146	0.0230337	122	50
635	0	635	0.3	4	0	0	605	10	1.0148	62	0.0895419	134	50
1015	0	1015	0.68	0	0	0	605	10	1.0148	70	0.0895419	134	50
12880	4230	8650	0.4	2	0	0	605	10	1.0148	70	0.0895419	134	50
10700	0	10700	0.4	2	0	0	605	10	1.0148	60	0.0895419	134	50
9901	0	9901	0.3	2	1	0	605	10	1.0148	70	0.0895419	134	50
8200	3800	4400	0.15	1	1	0	605	10	1.0148	70	0.0895419	134	50
9144	0	9144	0.35	2	1	0	605	10	1.0148	70	0.0895419	134	50
12400	5800	6600	0	3	1	0	605	10	1.0148	70	0.0895419	134	50
8945	5375	3570	0.35	1	1	0	605	10	1.0148	77	0.0895419	134	50
19305	0	19305	0.3	1	0	0	605	10	1.0148	70	0.0895419	134	50
13754	0	13754	0.15	2	1	0	605	10	1.0148	70	0.0895419	134	50
1800	0	1800	0	2	0	0	126	78	0.425854	189	0.0237762	104	57
2080	1575	505	0.4	3	0	0	68	73	0.833264	179	0.0415867	132	50
11900	3000	8900	0.35	2	1	0	92	74	0.833264	179	0.0415867	127	52
9000	7100	1900	0.3	2	1	0	88	41	0.452609	195	0.0192997	115	55
8646	6956	1690	0.3	5	1	0	72	41	0.452609	169	0.0192997	115	55
12935	12935	0	0.35	4	1	0	86	74	0.833264	193	0.0415867	127	52
5942	5622	320	0.2	2	1	0	59	78	0.425854	180	0.0237762	104	57
25436	13236	12200	0.37	3	1	0	89	74	0.833264	130	0.0415867	132	50
16670	9820	6850	0.33	2	1	0	75	41	0.452609	173	0.0192997	115	55
16200	9500	6700	0.35	2	1	0	76	74	0.833264	201	0.0415867	127	52
17840	16630	1210	0.35	2	1	0	89	74	0.78752	191	0.0371685	132	50
33726	10485	23241	0.3	2	1	0	76	41	0.452609	155	0.0192997	115	55
14699	9448	5251	0.25	4	1	0	63	41	0.452609	172	0.0192997	104	57
14780	5730	9050	0.35	2	1	0	82	73	0.78752	76	0.0371685	133	50
14712.39	14462.39	250	0	1	0	0	468	12	0.873863	108	0.120324	147	50
7165	5695	1470	0.24	4	0	0	949	11	0.772342	77	0.0830565	510	49
5660	2320	3340	0.27	2	0	0	949	11	0.772342	77	0.0830565	510	49
4675	4675	0	0.25	2	0	0	949	11	0.772342	77	0.0830565	510	49
9035	7355	1680	0.23	3	0	0	949	11	0.772342	77	0.0830565	510	49
5180	3460	1720	0.25	2	0	0	949	11	0.772342	92	0.0830565	510	49
12010	9340	2670	0.4	3	0	0	949	11	0.997483	77	0.0942119	412	48
16472.39	14462.39	2010	1.5	2	0	0	949	11	0.997483	77	0.0942119	412	48
17392.39	14462.39	2930	1.5	1	1	0	949	11	0.997483	109	0.0942119	412	48
17112.39	14462.39	2650	1.5	1	0	0	949	11	0.997483	92	0.0942119	412	48
29932.39	14462.39	15470	1.2	1	0	0	949	11	0.997483	77	0.0942119	412	48
20962.39	14462.39	6500	1.5	3	0	0	949	11	0.997483	77	0.0942119	412	48
18347.39	14462.39	3885	1.5	1	0	0	949	11	0.997483	77	0.0942119	412	48
2655	1425	1230	0.22	2	0	0	69	13	0.949536	100	0.111716	149	49
5135	3335	1800	0.2	3	0	0	70	13	0.949536	100	0.111716	152	46
9880	4570	5310	0.23	3	0	0	51	13	0.949536	100	0.111716	152	46
10750	7950	2800	0.4	4	0	0	67	13	2.0018799	105	0.0851708	163	46
17892.39	14462.39	3430	0.4	6	0	0	52	13	2.0018799	87	0.0851708	163	46
18412.39	14462.39	3950	0.3	2	0	0	70	13	1.09109	101	0.112544	172	44
17742.39	14462.39	3280	0	1	0	0	64	13	0.949536	113	0.111716	149	49
19737.39	14462.39	5275	0.35	2	0	0	51	13	1.09463	115	0.134109	164	46
19762.39	14462.39	5300	0.45	2	0	0	51	13	2.0018799	87	0.0851708	163	46
19822.39	14462.39	5360	0.4	2	0	0	63	13	1.5290101	87	0.118552	166	46
22412.39	14462.39	7950	0.3	5	0	0	51	13	1.09109	115	0.112544	172	44
19992.39	14462.39	5530	0.31	2	0	0	70	13	1.09109	131	0.112544	172	44
19262.39	14462.39	4800	0.25	4	0	0	51	13	1.07032	87	0.139805	155	46
26137.39	14462.39	11675	0.3	6	0	0	51	13	1.09109	115	0.112544	172	44
16487.39	14462.39	2025	0.32	5	0	0	52	13	1.09109	87	0.112544	160	44
20687.39	14462.39	6225	0.3	5	0	0	51	13	1.09109	87	0.112544	160	44
18042.39	14462.39	3580	0.36	1	0	0	73	13	1.5290101	106	0.118552	172	44
20142.39	14462.39	5680	0	4	0	0	64	13	0.949536	113	0	149	49
20772.39	14462.39	6310	0.4	5	0	0	66	13	1.5290101	107	0.118552	166	46
23012.39	14462.39	8550	0.3	5	0	0	76	13	1.07032	108	0.139805	155	46
2865	1895	970	0.18	3	0	0	51	13	0.630795	87	0.0746525	173	47
10740	5290	5450	0.3	4	0	0	51	13	1.026	115	0.126549	164	46
8035	3575	4460	0.19	3	0	0	70	13	0.909729	104	0.109611	148	50
4990	3990	1000	0.2	4	0	0	70	13	0.909729	87	0.109611	148	50
22487.39	14462.39	8025	0.25	2	0	0	72	13	0.971865	87	0.128478	164	49
18572.39	14462.39	4110	0.3	3	0	0	53	13	1.026	115	0.126549	164	46
20260.39	14462.39	5798	0.35	4	0	0	69	13	1.026	87	0.126549	173	47
26927.39	14462.39	12465	0.3	4	0	0	51	13	1.026	115	0.126549	161	48
26413.39	14462.39	11951	0.3	3	0	0	52	13	1.026	115	0.126549	161	48
18312.39	14462.39	3850	0.3	4	0	0	74	13	0.971865	87	0.128478	164	49
19617.39	14462.39	5155	0.21	5	0	0	72	13	0.909729	106	0.109611	148	50
23887.39	14462.39	9425	0.2	4	0	0	82	13	0.909729	116	0.109611	149	50
29312.39	14462.39	14850	0.3	2	0	0	65	13	0.971865	87	0.128478	164	49
19102.39	14462.39	4640	0.3	4	0	0	51	13	0.971865	87	0.128478	164	49
2300	2150	150	0.26	2	0	0	67	12	0.493717	115	0.0961813	357	42
11000	9630	1370	0.3	4	0	0	50	12	0.493717	98	0.0961813	237	48
6210	6110	100	0.35	4	0	0	87	12	0.657496	130	0.107054	222	49
7126.25	6826.25	300	0.23	4	0	0	50	12	0.493717	98	0.0961813	237	48
10770	3420	7350	0.4	2	0	0	104	12	0.657496	155	0.107054	268	47
20500	19000	1500	0.4	3	0	0	50	12	0.657496	98	0.107054	222	49
0	0	0	0	2	0	0	2309	12	0.976467	103	0.048405	324	37
29650.01	26437.01	3213	0.4	1	0	0	509	12	1.1027499	44	0.102677	151	50
30337.01	26437.01	3900	0.33	1	0	0	509	12	1.1027499	44	0.102677	183	50
26837.01	26437.01	400	0.3	7	1	0	509	12	1.1027499	44	0.102677	151	50
34057.01	26437.01	7620	0.3	1	0	0	509	12	1.1027499	44	0.102677	183	50
28842.01	26437.01	2405	0.35	1	0	0	509	12	1.1027499	44	0.102677	183	50
11570	6590	4980	0.28	5	1	0	65	12	0.986267	113	0.131149	370	43
8945	4040	4905	0.3	4	1	1	61	12	1.1246901	95	0.0817009	264	48
6535	3345	3190	0.2	4	0	0	80	12	0.833918	146	0.0631165	229	49
31543.01	26437.01	5106	0.2	2	0	0	80	12	0.833918	146	0.0631165	229	49
13570	11770	1800	0.25	4	0	0	66	12	0.843382	113	0.106423	487	48
29719.01	26437.01	3282	0.1	2	1	1	80	12	0.785611	146	0.079715	229	49
34417.01	26437.01	7980	0.16	1	0	0	65	12	0.785611	95	0.079715	174	50
29117.01	26437.01	2680	0.27	3	1	1	67	12	0.986267	113	0.131149	370	43
30171.01	26437.01	3734	0.07	1	0	0	61	12	0.785611	95	0.079715	174	50
35437.01	26437.01	9000	0.2	3	0	0	80	12	0.833918	146	0.0631165	229	49
28157.01	26437.01	1720	0.1	2	0	0	61	12	0.785611	95	0.079715	183	50
14320	13320	1000	0.25	2	0	0	63	12	0.843382	113	0.106423	487	48
18420	16575	1845	0.3	2	0	0	69	12	0.986267	117	0.131149	370	43
36077.01	26437.01	9640	0.12	2	1	1	61	12	0.785611	95	0.079715	183	50
7915	4100	3815	0.5	4	0	0	50	12	1.1985199	112	0.145869	369	25
4150	3500	650	0.35	1	0	0	74	12	1.1985199	154	0.145869	369	25
10753	9228	1525	0.25	5	0	0	65	12	1.1246901	113	0.0817009	288	42
7450	2760	4690	0.26	2	1	1	60	12	1.1246901	101	0.0817009	244	47
6000	6000	0	0.25	2	0	0	63	12	1.1246901	101	0.0817009	211	50
9566	8406	1160	0.25	2	0	0	73	12	1.1246901	148	0.0817009	369	26
11175	11175	0	0	0	0	0	50	12	0.707447	98	0.105582	272	47
5310	3330	1980	0.26	4	0	0	61	12	1.1246901	101	0.0817009	211	50
9197	8897	300	0.2	3	0	0	65	10	0.852595	107	0.0711494	172	49
8400	250	8150	0.25	4	0	0	73	12	1.1246901	101	0.0817009	211	50
10965	10615	350	0.26	3	0	0	51	12	1.1246901	98	0.0817009	288	42
6450	3450	3000	0.24	4	0	0	61	10	0.876965	114	0.0602005	179	50
9415	8315	1100	0.25	5	0	0	71	12	1.081	125	0.113007	397	24
7328	4798	2530	0.18	3	0	0	62	10	0.852595	107	0.0711494	172	49
6050	3500	2550	0.2	4	0	0	59	10	0.852595	107	0.0711494	161	50
8858	4298	4560	0.18	5	0	0	59	10	0.852595	107	0.0711494	161	50
9375	3875	5500	0	5	0	0	66	12	0.707447	112	0.105582	272	47
19612	4312	15300	0.3	1	0	0	59	10	1.1626	107	0.0710065	180	49
19729	17580	2149	0.25	4	0	0	79	12	1.04355	146	0.170746	244	47
28787.01	26437.01	2350	0.13	1	0	0	58	10	0.852595	107	0.0711494	161	50
33947.01	26437.01	7510	0.15	2	1	0	59	10	0.852595	107	0.0711494	161	50
13200	12950	250	0	4	0	0	58	10	0.662969	107	0.0604957	201	48
13950	5450	8500	0.35	4	0	0	60	12	1.1626	101	0.0710065	218	47
28212.01	26437.01	1775	0.1	2	0	0	90	12	0.707447	154	0.105582	272	47
14500	12800	1700	0.27	3	1	1	50	12	1.1246901	98	0.0817009	288	42
15960	6680	9280	0.27	6	0	0	60	12	1.1246901	101	0.0817009	211	50
17201	14232	2969	0.25	4	0	0	79	12	1.04355	146	0.170746	244	47
29337.01	26437.01	2900	0.13	5	0	0	61	12	0.662969	101	0.0604957	211	47
28887.01	26437.01	2450	0.2	3	0	0	61	12	0.852595	104	0.0711494	153	50
29537.01	26437.01	3100	0.25	3	0	0	83	12	1.1985199	115	0.145869	289	38
31837.01	26437.01	5400	0.12	5	0	0	60	12	0.615576	104	0.0890046	289	38
29937.01	26437.01	3500	0.25	2	0	0	63	12	1.081	142	0.113007	470	13
29587.01	26437.01	3150	0.25	2	0	0	61	12	1.081	101	0.113007	470	13
27587.01	26437.01	1150	0.15	3	0	0	66	12	0.662969	104	0.0604957	211	47
34797.01	26437.01	8360	0.14	2	0	0	79	12	0.662969	146	0.0604957	211	47
30487.01	26437.01	4050	0.25	4	0	0	61	12	1.081	101	0.113007	470	13
29631.01	26437.01	3194	0.13	1	0	0	61	12	0.615576	101	0.0890046	236	45
30367.01	26437.01	3930	0.25	4	0	0	77	12	1.081	104	0.113007	470	13
36273.01	26437.01	9836	0.2	4	0	0	61	12	0.852595	101	0.0711494	153	50
37787.01	26437.01	11350	0.22	1	1	1	66	12	0.852595	104	0.0711494	134	50
32107.01	26437.01	5670	0.1	1	0	0	392	12	0.57521	98	0.0564973	158	50
30287.01	26437.01	3850	0.1	2	0	0	392	12	0.57521	98	0.0564973	158	50
30237.01	26437.01	3800	0.15	1	0	0	79	12	0.57521	146	0.0564973	189	48
32022.01	26437.01	5585	0.12	3	0	0	66	12	0.57521	102	0.0564973	189	48
33757.01	26437.01	7320	0.1	2	0	0	60	12	0.57521	104	0.0564973	182	49
26787.01	26437.01	350	0.2	2	0	0	392	12	0.57521	98	0.0564973	158	50
29727.01	26437.01	3290	0.16	3	0	0	392	12	0.57521	98	0.0564973	158	50
29822.01	26437.01	3385	0.16	1	0	0	392	12	0.57521	98	0.0564973	158	50
28387.01	26437.01	1950	0.33	4	0	0	60	12	0.57521	98	0.0564973	189	48
28387.01	26437.01	1950	0.15	2	0	0	392	12	0.57521	98	0.0564973	158	50
33687.01	26437.01	7250	0.25	1	1	1	61	12	0.613675	101	0.0650758	294	45
34270.01	26437.01	7833	0.3	4	0	0	61	12	0.613675	101	0.0650758	294	45
30632.01	26437.01	4195	1	1	0	0	80	12	0.613675	107	0.0650758	253	46
30397.01	26437.01	3960	0.14	1	0	0	60	12	0.464665	104	0.0511946	112	50
29027.01	26437.01	2590	0.12	2	0	0	61	12	0.464665	101	0.0511946	91	50
28687.01	26437.01	2250	0.12	3	0	0	61	12	0.464665	104	0.0511946	91	50
30687.01	26437.01	4250	0.11	2	0	0	66	12	0.464665	120	0.0511946	112	50
28437.01	26437.01	2000	0.15	1	0	0	65	12	0.478632	104	0.0481852	86	50
28987.01	26437.01	2550	0.25	2	0	0	65	12	0.551082	104	0.0589196	138	50
30637.01	26437.01	4200	0.14	4	0	0	61	12	0.464665	101	0.0511946	91	50
28037.01	26437.01	1600	0.25	2	0	0	62	12	0.494985	101	0.0714061	197	48
27437.01	26437.01	1000	0.25	4	0	0	61	12	0.494985	101	0.0714061	184	49
31412.01	26437.01	4975	0.15	4	0	0	61	12	0.478632	101	0.0481852	86	50
31437.01	26437.01	5000	0.27	2	0	0	61	12	0.613675	101	0.0650758	294	45
31482.01	26437.01	5045	0.14	2	0	0	392	12	0.464665	98	0.0511946	100	50
37437.01	26437.01	11000	0.25	5	0	0	79	12	0.494985	115	0.0714061	184	49
35857.01	26437.01	9420	0.1	4	0	0	392	12	0.464665	98	0.0511946	100	50
36587.01	26437.01	10150	0.17	3	0	0	61	12	0.494985	104	0.0714061	184	49
29387.01	26437.01	2950	0.16	2	0	0	64	12	0.581543	104	0.0476926	104	50
30457.01	26437.01	4020	0.4	2	0	0	61	12	0.67566	95	0.0458613	141	50
32277.01	26437.01	5840	0.27	4	0	0	61	12	0.67566	101	0.0458613	113	50
30937.01	26437.01	4500	0.25	2	0	0	61	12	0.67566	95	0.0458613	141	50
32287.01	26437.01	5850	0.28	4	0	0	61	12	0.67566	101	0.0458613	118	50
30549.01	26437.01	4112	0.23	3	0	0	65	12	0.67566	98	0.0458613	141	50
30197.01	26437.01	3760	0.3	4	0	0	60	12	0.67566	95	0.0458613	141	50
31387.01	26437.01	4950	0.25	2	0	0	60	12	0.67566	98	0.0458613	141	50
38837.01	26437.01	12400	0.3	5	0	0	65	12	0.67566	104	0.0458613	113	50
6545	3800	2745	0.3	2	0	0	92	9	0.334368	129	0.0360004	63	57
3815	3365	450	0.21	3	0	0	99	12	0.218784	135	0.0135602	78	62
8886	7311	1575	0.35	4	0	0	92	9	0.455895	129	0.0346697	63	53
9050	7250	1800	0.3	1	0	0	96	9	0.334368	129	0.0360004	63	57
9490	8190	1300	0.27	4	0	0	67	12	0.218784	113	0.0135602	78	62
8975	4650	4325	0.4	4	0	1	91	9	0.481523	129	0.0387207	70	52
7200	5500	1700	0.35	4	0	1	104	9	0.455895	129	0.0346697	78	54
23830	9980	13850	0.35	2	0	1	91	9	0.455895	129	0.0346697	78	54
19280	8280	11000	0.35	4	0	1	92	9	0.338807	129	0.018681	60	60
16150	8100	8050	0.4	3	0	1	105	9	0.481523	129	0.0387207	71	51
15620	12320	3300	0.36	4	0	0	90	9	0.481523	129	0.0387207	71	51
19300	12025	7275	0.35	3	0	0	98	9	0.338807	129	0.018681	60	60
11575	9250	2325	0.7	3	0	0	58	10	1.31739	107	0.0745967	214	49
11740	10240	1500	0.75	5	0	0	59	10	1.31739	107	0.0745967	214	49
9650	3050	6600	0.7	4	0	0	59	10	1.31739	107	0.0745967	214	49
12495	5535	6960	0.74	3	0	0	53	10	1.31739	107	0.0745967	214	49
9140	4950	4190	0.7	1	0	0	68	10	1.1626	122	0.0710065	189	49
22275	12425	9850	0.7	3	0	0	60	10	1.1626	107	0.0710065	189	49
19950	11600	8350	0.75	4	0	0	60	10	1.31739	107	0.0745967	214	49
25197	7230	17967	0.7	4	0	0	84	10	1.01121	107	0.107368	183	50
17480	7180	10300	0.7	2	0	0	82	10	1.01121	107	0.107368	173	50
18624	9364	9260	0.71	4	0	0	75	10	1.31739	107	0.0745967	173	50
41137.01	26437.01	14700	1.1	2	0	0	82	10	1.31739	107	0.0745967	173	50
16916.14	12466.14	4450	1.6	2	1	0	786	11	1.48599	77	0.133811	401	31
13746.14	12466.14	1280	0	1	1	0	979	11	1.47489	68	0.170948	353	30
18466.14	12466.14	6000	1.6	1	0	0	979	11	1.47489	68	0.170948	353	30
11668	9028	2640	0.23	2	0	0	92	8	0.613675	128	0.0650758	234	49
7825	7575	250	0.21	2	0	1	78	12	0.517933	115	0.0574431	107	50
11990	9890	2100	0.2	3	0	0	90	8	0.455715	128	0.0534479	141	50
21120	14420	6700	0.2	2	0	0	89	8	0.455715	128	0.0534479	105	50
14685	12935	1750	0.3	4	0	0	60	12	0.651481	101	0.0445043	136	50
20186	3786	16400	0.22	1	0	0	91	8	0.613675	128	0.0650758	246	48
40572.01	26437.01	14135	0.3	3	0	0	60	12	0.651481	101	0.0445043	136	50
37637.01	26437.01	11200	0.25	1	0	0	61	12	0.651481	101	0.0445043	136	50
12420	9520	2900	0.22	3	0	0	77	12	0.44421	137	0.0352098	123	50
7730	7730	0	0.28	3	0	0	91	7	0.474405	124	0.0538691	111	50
5596	5596	0	0.29	2	0	0	67	7	0.474405	104	0.0538691	73	51
9795	8135	1660	0.26	2	0	0	115	9	0.455715	143	0.0534479	138	50
12415	7815	4600	0.4	4	1	0	92	9	0.685969	153	0.0516659	234	49
22697	18848	3849	0.32	2	0	0	65	7	0.478632	104	0.0481852	73	51
21900	9500	12400	0.32	4	0	0	66	7	0.474405	104	0.0538691	111	50
13594	11009	2585	0.38	2	0	0	91	9	0.481523	129	0.0387207	86	51
13220	11220	2000	0.4	2	0	0	106	9	0.517907	129	0.0448187	188	49
18515	17915	600	0.25	4	0	0	116	9	0.455715	143	0.0534479	138	50
20509	7984	12525	0.38	4	0	0	144	9	0.481523	129	0.0387207	86	51
14220	4420	9800	0.2	1	0	0	103	12	0.44421	158	0.0352098	123	50
14220	5620	8600	0.4	2	0	0	116	9	0.517907	129	0.0448187	188	49
11535.31	11255.31	280	1.1	1	1	0	407	10	1.0192	95	0.0653554	401	38
11930.31	11255.31	675	1	2	1	0	479	10	1.0192	89	0.0653554	403	48
14755.31	11255.31	3500	1.1	2	1	0	407	10	1.0192	89	0.0653554	401	38
13955.31	11255.31	2700	1.05	2	1	0	479	10	1.0192	111	0.0653554	403	48
16682.31	11255.31	5427	1.1	1	1	0	479	10	1.0192	111	0.0653554	403	48
30615.31	11255.31	19360	0.98	2	1	0	479	10	1.0192	89	0.0653554	403	48
20400.31	11255.31	9145	1.2	2	0	0	407	10	1.0192	95	0.0653554	401	38
8560	0	8560	0.15	0	0	1	48	7	0.188956	106	0.0087758	42	59
3885	2760	1125	0.4	2	1	0	69	57	0.75642	105	0.0381634	141	50
6904	4300	2604	0.4	4	0	0	62	57	0.75642	115	0.0381634	141	50
7550	5950	1600	0.4	5	1	0	64	57	0.75642	101	0.0381634	157	50
19230	11000	8230	0.5	2	1	0	64	57	0.75642	122	0.0381634	141	50
2140	2140	0	1	4	1	0	67	93	0.734187	158	0.0748343	252	51
5500	5000	500	0.4	5	1	0	63	93	0.734187	132	0.0748343	278	47
9340	4650	4690	1.1	3	1	0	89	8	0.734187	210	0.0748343	244	63
9460	1200	8260	1.3	2	1	0	193	93	0.734187	199	0.0748343	273	48
10892	5117	5775	0.3	2	1	1	72	19	0.624856	171	0.0461306	192	65
3350	3350	0	0.35	4	1	0	71	93	0.734187	134	0.0748343	252	51
20840	8800	12040	1.6	2	1	0	251	87	1.11289	477	0.0941401	359	25
6700	3450	3250	0.85	2	1	0	69	27	1.0224299	119	0.0450047	284	51
8010	1210	6800	0.5	3	1	0	65	27	0.734187	112	0.0748343	284	51
3683.63	3683.63	0	0.1	2	1	0	59	27	0.624519	108	0.0479997	301	47
13947	9237	4710	0.6	3	1	0	63	27	0.734187	174	0.0748343	284	51
2150	750	1400	0.15	1	1	1	92	21	0.924931	144	0.0924169	360	50
11893	10830	1063	0.2	2	0	0	103	21	0.924931	155	0.0924169	360	50
13987	9237	4750	0.12	2	0	0	91	21	0.924931	142	0.0924169	360	50
2250	1500	750	0.02	4	1	0	99	87	0.712439	104	0.0314033	321	50
3130	1630	1500	0.15	2	1	0	28	87	0.857433	122	0.0595225	343	50
9255	6560	2695	0.2	2	1	0	58	42	0.924931	109	0.0924169	360	50
4935	2350	2585	0.03	2	1	0	121	93	0.857433	179	0.0595225	360	50
14837	9237	5600	0.1	2	0	1	138	73	0.88993	168	0.0727634	360	50
20650	11450	9200	0.6	1	1	1	118	73	0.924931	108	0.0924169	360	50
18426	17926	500	0.1	2	0	0	95	87	0.857433	112	0.0595225	343	50
2260	2260	0	0	3	1	0	97	62	0.727428	135	0.023387	355	50
1250	1250	0	0.03	4	1	1	81	62	0.727428	140	0.023387	351	50
2852	2200	652	0.03	4	1	0	61	14	0.672431	135	0.0247575	352	50
1632	1330	302	0	3	1	0	88	14	0.672431	140	0.0247575	352	50
29053	28153	900	0.01	2	0	0	83	61	1.0549001	66	0.0567136	350	51
18750	8585	10165	0.4	2	1	0	483	83	1.07491	90	0.0581969	352	51
21930	20288	1642	0	2	0	0	290	31	0.922196	79	0.0299754	348	52
29855.55	25472.55	4383	0.03	4	1	0	52	73	1.0549001	98	0.0567136	350	51
30038.65	28808.65	1230	0.03	2	1	0	56	35	1.0549001	101	0.0567136	350	51
31588	7408	24180	0.5	1	1	0	483	83	1.07491	124	0.0581969	352	51
8670	3970	4700	0.4	1	1	0	94	93	1.07491	98	0.0581969	349	52
12787	9237	3550	0.2	1	1	0	75	17	0.847431	118	0.0647285	358	50
6102	5052	1050	0.4	1	0	0	83	93	1.07491	155	0.0581969	352	51
7205	3855	3350	0.5	1	1	0	103	93	1.07491	156	0.0581969	359	50
12940	12440	500	0.1	2	0	0	73	17	0.847431	175	0.0647285	358	50
8295	4195	4100	0.1	2	1	0	51	17	0.847431	118	0.0647285	358	50
13175	7915	5260	0.4	1	1	0	153	93	1.07491	146	0.0581969	349	52
17752	9237	8515	0.3	3	1	0	102	87	0.857433	131	0.0595225	357	50
13800	10950	2850	0.4	4	1	0	80	93	1.07491	122	0.0581969	352	51
20375	8875	11500	0.4	6	1	0	62	87	0.857433	81	0.0595225	357	50
36840	36840	0	0.07	2	0	0	96	87	0.847431	168	0.0647285	358	50
7473.8	5228.8	2245	0.2	1	0	0	79	17	0.782425	124	0.0239863	344	53
6728.8	5228.8	1500	0.01	1	0	0	59	17	0.782425	125	0.0239863	345	53
8033.8	5228.8	2805	0.15	1	0	0	74	17	0.782425	120	0.0239863	345	53
8494.8	5228.8	3266	0.2	1	0	0	74	17	0.782425	120	0.0239863	344	53
1350	1350	0	1.15	1	1	0	78	42	1.17219	232	0.0774411	365	22
10317	9237	1080	0.15	3	1	0	90	43	1.17219	162	0.0774411	365	22
23010	11100	11910	1.2	1	1	0	145	45	1.17219	282	0.0774411	365	22
15907	9237	6670	0	4	1	0	174	67	1.0980099	478	0.0885225	370	16
8395	995	7400	0.6	2	1	0	57	52	1.16457	138	0.07989	381	20
11390	2750	8640	1.5	3	1	0	169	31	2.4511099	190	0.207482	535	11
29495	10215	19280	1.5	2	1	0	80	10	1.17219	174	0.0774411	420	18
23560	8560	15000	1.2	2	1	1	96	60	1.16457	143	0.07989	381	20
2750	2750	0	0	4	1	0	121	21	0.32436	165	0.100563	284	44
17856	9237	8619	0.2	4	0	0	577	58	0.922196	62	0.0299754	354	50
1900	1300	600	1.7	1	1	0	167	73	1.1197701	79	0.0576423	343	50
2000	1000	1000	2	2	1	0	167	73	1.1197701	41	0.0576423	343	50
6755	5715	1040	0.05	4	1	0	116	86	0.919774	106	0.0385664	315	53
4400	2500	1900	1.7	4	1	0	93	86	0.919774	145	0.0385664	315	53
15447	9237	6210	0	2	1	0	49	63	0.919774	120	0.0385664	315	53
1950	1400	550	0	1	1	0	54	17	0.897267	133	0.141076	326	51
9537	9237	300	0.3	3	0	0	54	17	0.897267	133	0.141076	326	51
9288	9188	100	0.3	4	1	0	55	17	0.897267	138	0.141076	326	51
5465	2850	2615	0.5	4	0	0	127	63	1.14726	171	0.0879224	317	51
9237	9237	0	0	5	0	1	79	17	0.804769	202	0.15588	332	51
8115	6175	1940	0.5	3	0	0	52	17	1.14726	133	0.0879224	317	51
11283	10663	620	0.35	4	0	0	54	17	1.0372601	133	0.114728	319	51
9325	8725	600	0.31	5	0	0	55	17	1.0372601	135	0.114728	319	51
12720	10920	1800	0.5	2	0	0	54	17	1.14726	154	0.0879224	317	51
6685	6335	350	0.32	2	0	0	60	17	1.0372601	132	0.114728	319	51
24622	9237	15385	0.5	1	1	0	188	63	1.0422601	186	0.0476218	292	52
15865	4275	11590	0.5	4	0	0	188	63	1.0422601	106	0.0476218	292	52
2354	1704	650	0.15	2	0	0	187	68	1.03478	166	0.0744976	328	51
1704	1704	0	0.4	0	0	0	92	83	1.1197701	108	0.0576423	336	52
5775	5115	660	0.1	5	1	0	104	46	1.03478	193	0.0744976	341	54
9970	4520	5450	1	3	1	0	116	87	1.1197701	200	0.0576423	336	52
7908	7558	350	0.31	4	1	0	66	39	1.05977	146	0.0562299	347	50
7275	4575	2700	0.3	4	1	0	72	39	1.05977	162	0.0562299	347	50
12337	9237	3100	0.4	0	1	0	73	73	1.05977	153	0.0562299	347	50
6060	3250	2810	0.3	4	1	0	114	74	1.05977	101	0.0562299	343	50
5950	4150	1800	0.4	3	1	0	119	63	1.14726	101	0.0879224	340	50
11600	9100	2500	0.12	1	1	0	157	153	1.0372601	201	0.114728	343	50
10557	9237	1320	0	2	1	0	79	57	0.897267	205	0.141076	353	50
20817	9237	11580	0.4	2	1	1	137	73	1.0372601	162	0.114728	343	50
2600	1900	700	0.1	2	1	0	87	94	0.867263	127	0.027645	296	51
9237	9237	0	0.05	0	0	0	68	83	0.867263	130	0.027645	296	51
7100	7100	0	0.02	3	0	0	128	45	0.652261	110	0.0179738	255	55
4500	4250	250	0	4	1	0	59	44	0.432259	156	0.0172857	215	59
10600	9500	1100	0.4	4	1	0	91	83	1.0422601	147	0.0476218	317	50
10715	10515	200	0.4	3	1	0	418	8	1.0422601	342	0.0476218	317	50
13090	10120	2970	0.45	2	1	0	108	88	1.14976	139	0.0792211	333	50
1200	1200	0	0	4	1	1	52	20	1.14976	143	0.0792211	293	51
6336	5395	941	0.01	2	1	0	70	21	0.669757	152	0.0191668	335	51
12675	11835	840	1	2	1	0	77	60	1.02977	165	0.0859402	353	50
4656	3756	900	1	2	1	0	119	56	1.02977	220	0.0859402	345	50
6254	5904	350	0.12	2	1	0	73	21	1.02977	152	0.0859402	345	50
6500	6500	0	1.7	2	1	0	157	61	1.14726	217	0.0879224	340	50
4396	2866	1530	0.7	2	1	0	57	64	1.02977	134	0.0859402	353	50
35387	13300	22087	0.02	4	1	0	61	58	0.669757	182	0.0191668	304	51
18560	13200	5360	0	2	1	0	72	21	0.669757	152	0.0191668	335	51
2800	2080	720	0.35	4	1	0	119	80	1.02977	144	0.0859402	353	50
0	0	0	0.7	4	1	1	108	87	1.02977	109	0.0859402	345	50
5810	5010	800	1.7	2	1	0	52	26	1.14976	115	0.0792211	340	50
11750	6850	4900	0.12	4	1	0	71	74	0.669757	133	0.0191668	335	51
8915	8065	850	0.15	2	1	0	204	18	0.942261	89	0.0464916	326	50
7500	2700	4800	0.35	3	1	0	51	26	1.02976	115	0.0652343	353	50
22260	19560	2700	0.53	4	1	0	72	77	1.02977	120	0.0859402	345	50
14000	10900	3100	0.54	4	1	0	112	78	1.02977	181	0.0859402	345	50
13610	11500	2110	0.6	3	1	0	102	33	1.02977	178	0.0859402	345	50
2770	2270	500	0.5	1	1	0	74	65	0.862265	140	0.0921735	334	50
1450	1450	0	0.02	3	1	0	75	21	0.862265	152	0.0921735	318	52
1070	720	350	0	3	1	0	99	67	0.749771	172	0.0652312	334	50
880	880	0	0	4	1	0	74	67	0.749771	146	0.0652312	334	50
6900	6500	400	0	2	1	0	80	61	0.749771	151	0.0652312	334	50
8713.66	2408.66	6305	0.08	2	1	0	82	65	0.862265	114	0.0921735	341	50
7870	1170	6700	0.2	1	1	0	98	21	0.862265	142	0.0921735	318	52
8950	3500	5450	0.48	2	1	0	149	75	0.862265	154	0.0921735	353	50
5078.66	2408.66	2670	1	1	1	0	101	21	0.862265	152	0.0921735	341	50
5037	4587	450	0.5	3	1	0	88	61	0.862265	229	0.0921735	341	50
14020	1800	12220	0.5	4	1	0	81	73	0.862265	135	0.0921735	353	50
15190	12540	2650	0.1	4	1	0	161	87	0.862265	205	0.0921735	353	50
1000	1000	0	0.03	5	1	0	67	73	0.43974	187	0.0311729	251	52
8500	8500	0	0.15	4	1	0	112	63	0.43974	182	0.0311729	196	57
580	500	80	0.48	5	1	0	63	67	0.629759	145	0.0190186	262	54
2818.5	1950	868.5	0.35	2	1	0	179	55	0.0135455	129	0.0017796	118	143
2150	1500	650	0.35	2	1	0	74	56	0.0135455	187	0.0017796	118	143
5760	4460	1300	0.25	4	1	0	50	34	0.0383287	118	0.0094858	43	343
2300	200	2100	0.25	2	1	0	82	70	0.582939	208	0.0330921	232	103
2650	1700	950	0	1	1	0	81	83	0.582939	28	0.0330921	289	81
2525	2525	0	0.9	1	1	0	102	70	0.582939	237	0.0330921	232	103
5980	2480	3500	1.3	1	1	0	81	4	2.1733	155	0.432794	382	32
29620	14420	15200	1.4	2	1	0	78	4	2.1733	155	0.432794	382	32
36852.2	16222.2	20630	1.1	2	1	0	63	4	2.1733	155	0.432794	382	32
9430	2230	7200	0.4	1	1	0	150	93	0.401111	146	0.0337234	184	74
3530	3030	500	0.8	1	1	1	153	6	2.1117001	224	0.731931	358	51
10087	9237	850	0.15	4	1	0	80	15	0.454757	135	0.10126	465	55
11690	11690	0	0	2	1	0	72	42	0.454757	151	0.10126	468	54
5140	4140	1000	0	4	1	0	65	87	0.449757	101	0.128921	455	54
10237	9237	1000	0	1	1	0	263	38	0.0947533	190	0.0229296	139	89
980	980	0	0.1	2	1	0	147	61	0.207255	75	0.0251161	185	87
2100	1500	600	0.7	3	1	0	196	45	0.207255	264	0.0251161	185	87
12947	9237	3710	0.35	1	0	0	1737	27	0.321407	84	0.056532	156	55
13237	9237	4000	0.25	2	1	0	1737	27	0.321407	84	0.056532	156	55
1390	1390	0	0.25	4	0	0	139	113	0.533926	270	0.0165184	341	585
76500	76500	0	0.12	23	1	0	130	113	0.533926	237	0.0165184	223	395
10355	9855	500	0	5	1	1	241	67	0.405992	176	0.0893969	87	50
11005	1400	9605	0	4	1	0	81	68	0.754523	158	0.0668282	118	50
28450	11750	16700	0.5	2	0	1	90	11	0.545009	177	0.044569	266	51
6365	4880	1485	0.3	2	0	0	50	11	0.0850759	117	0.0089611	242	98
7275	7275	0	0.22	2	0	0	77	11	0.0850759	177	0.0089611	105	173
5975	4975	1000	0.31	5	0	0	49	11	0.0850759	117	0.0089611	152	194
6650	3675	2975	0.35	5	0	0	92	11	0.0850759	29	0.0089611	205	164
25050	11550	13500	0.32	2	0	0	49	11	0.0850759	117	0.0089611	152	194
8197	7247	950	0.4	3	0	0	66	11	0.48758	117	0.0169039	311	53
13703	7328	6375	0.16	4	1	0	49	11	0.0850759	117	0.0089611	205	164
9957	3882	6075	0.45	4	0	0	50	11	0.48758	117	0.0169039	242	98
6511	4231	2280	0.16	1	0	0	50	11	0.0850759	117	0.0089611	152	194
7324.67	2134.67	5190	0.35	2	1	0	53	45	0.48758	91	0.0169039	233	56
11052	9952	1100	0.2	3	0	0	53	45	0.48758	91	0.0169039	233	56
5375	4925	450	0.2	3	0	0	54	45	0.425007	91	0.0162937	189	55
6515	4275	2240	1.8	4	1	1	115	69	0.48758	36	0.0169039	208	90
7505	7505	0	0.02	2	1	0	106	21	0.032505	127	0.0091729	167	196
4890	4190	700	0.02	4	1	0	64	21	0.032505	115	0.0091729	167	196
7459.67	2134.67	5325	0.35	2	1	0	54	45	0.48758	91	0.0169039	233	56
34750	9750	25000	0.5	4	1	0	127	65	0.48758	192	0.0169039	208	90
20950	8950	12000	0.25	2	1	0	68	64	0.48758	28	0.0169039	208	90
2100	2100	0	1.5	2	1	0	107	88	0.275387	161	0.0155997	424	127
1025	1025	0	1.5	1	1	0	148	65	0.117933	42	0.0209939	552	115
10534.67	2134.67	8400	0.15	3	0	0	115	55	0.117933	227	0.0209939	463	99
17984.67	2134.67	15850	0.17	2	0	0	113	53	0.117933	304	0.0209939	463	99
2207	1707	500	0.02	1	1	0	83	35	0.275387	158	0.0155997	449	79
2771	1896	875	0	6	1	0	77	61	0.275387	155	0.0155997	494	86
3286.67	2134.67	1152	0	1	1	0	77	193	0.275387	188	0.0155997	552	115
2040	2040	0	0.12	3	1	0	83	61	0.275387	152	0.0155997	494	86
12062	9562	2500	0.2	2	1	0	83	70	0.527809	171	0.0567292	358	51
9685	7185	2500	0.02	2	1	0	146	71	0.275387	294	0.0155997	449	79
2740	2740	0	0	4	1	0	70	40	0.204948	124	0.009755	258	71
1857	520	1337	0	3	1	1	73	40	0.204948	128	0.009755	258	71
3934.67	2134.67	1800	0	2	1	0	95	45	0.282979	30	0.0229766	303	60
4930	4930	0	0	3	1	0	61	45	0.282979	91	0.0229766	303	60
1495	695	800	0	3	1	1	86	67	0.316706	130	0.0351184	127	53
1825	1000	825	0	4	1	0	65	67	0.316706	138	0.0351184	127	53
750	750	0	0	3	0	1	95	86	0.316706	187	0.0351184	127	53
7775	1500	6275	0.03	2	1	0	100	103	0.3222	163	0.0319373	125	53
4834.67	2134.67	2700	0	0	1	0	94	6	0.309139	127	0.0246517	157	50
12310	9260	3050	0.35	4	1	0	61	43	0.327328	88	0.0455994	297	51
18638	7463	11175	0.25	2	1	0	58	43	0.327328	98	0.0455994	297	51
3934.67	2134.67	1800	0	1	1	0	102	45	0.282979	111	0.0229766	258	55
2884.67	2134.67	750	0	1	1	0	73	64	0.222189	154	0.0099084	197	51
3084.67	2134.67	950	0	2	1	0	56	45	0.222189	91	0.0099084	197	51
3986.67	2134.67	1852	0.07	2	1	0	81	45	0.282979	99	0.0229766	258	55
3640	3640	0	0.47	4	0	0	73	62	0.545009	134	0.044569	270	49
350	0	350	0.12	3	1	1	64	45	0.419939	91	0.0141091	251	47
6138	4238	1900	0.01	1	1	0	77	45	0.282979	91	0.0229766	258	55
9360	9360	0	0	4	1	0	76	64	0.222189	43	0.0099084	176	46
9475	2450	7025	0.3	2	1	0	87	13	0.419939	162	0.0141091	251	47
11900	11900	0	0.6	2	1	0	73	45	0.587529	100	0.0565992	278	51
15650	15650	0	0.35	3	0	0	98	14	0.470295	135	0.0345516	265	49
6580	4480	2100	0.2	6	1	1	61	62	0.419939	121	0.0141091	264	51
18740	17240	1500	0.42	2	0	0	77	11	0.545009	155	0.044569	270	49
16142	14260	1882	0.5	2	1	0	157	11	0.545009	65	0.044569	286	50
27730	24130	3600	0.6	2	1	0	53	45	0.587529	98	0.0565992	328	58
21835	14430	7405	0	5	0	0	76	64	0.222189	43	0	176	46
39070	25120	13950	0.6	2	1	0	54	45	0.587529	91	0.0565992	278	51
1860	1400	460	0.15	2	0	1	79	90	0.325415	159	0.0375505	125	52
2864	2864	0	0	0	1	0	99	76	0.3222	168	0.0319373	125	53
1512	1512	0	0	1	0	0	92	43	0.3222	164	0.0319373	125	53
25055	19235	5820	0.05	4	1	0	119	90	0.325415	167	0.0375505	125	52
1960	1960	0	0.02	1	1	0	83	113	0.204895	91	0	170	45
11190	9540	1650	0.35	4	0	0	91	68	0.327328	114	0.0455994	297	51
7150	4050	3100	0.02	3	1	0	83	113	0.204895	91	0	170	45
16585	6360	10225	0.02	4	1	0	83	113	0.204895	91	0	170	45
9653.22	2134.67	7518.55	0.35	1	0	0	74	69	0.216258	122	0.0359793	219	51
19834.67	2134.67	17700	0.32	2	0	0	86	69	0.216258	85	0.0359793	219	51
4150	3400	750	0.04	3	1	0	83	113	0.204895	91	0	170	45
12008	5283	6725	0.3	2	1	0	97	5	0.216258	339	0.0359793	219	51
10334.67	2134.67	8200	0.42	2	0	1	77	81	0.615075	172	0.0515512	284	49
28095	20095	8000	0.29	3	1	0	140	40	0.214418	330	0.0532739	237	52
21730	20880	850	0.31	8	1	0	414	43	0.216258	226	0.0359793	358	51
14862	10562	4300	0.6	4	0	1	261	55	0.615075	164	0.0515512	284	49
2800	2000	800	0	4	1	0	118	83	0.222189	142	0.0099084	187	38
1770	1170	600	0	1	1	0	94	60	0.222189	151	0.0099084	176	46
1770	1770	0	0.01	3	1	1	81	83	0.222189	147	0.0099084	187	38
15379	6430	8949	0.6	4	1	0	106	4	0.906045	179	0.165044	488	50
23540	10230	13310	0.45	2	0	1	105	4	0.64095	165	0.0745097	468	50
9970	9970	0	0	4	0	0	182	113	0.204895	168	0	170	45
5505	3135	2370	0.15	2	1	0	131	61	0.470295	175	0.0345516	252	48
4616	1956	2660	0.08	0	1	0	126	58	0.419939	247	0.0141091	237	45
8786	7096	1690	0.4	2	0	1	166	55	0.590143	269	0.0350522	219	50
7250	2200	5050	0.08	2	1	1	78	81	0.222189	130	0.0099084	251	47
6020	4120	1900	0.1	4	1	1	216	72	0.419939	159	0.0141091	237	45
2134.67	2134.67	0	0	2	0	0	102	0	2.4277201	117	0.0702848	154	29
250	250	0	0	2	0	0	84	0	2.4277201	103	0.0702848	154	29
250	250	0	0	1	0	0	95	0	2.4277201	106	0.0702848	130	20
250	250	0	0	2	0	0	84	0	1.85682	103	0.8107	147	40
1380	1380	0	0	1	0	0	69	66	0.581956	98	0.0338987	158	50
1150	1150	0	0	2	0	0	51	66	0.545009	83	0.044569	278	48
8096.59	2134.67	5961.92	0.5	2	1	1	85	0	3.3750701	103	0.221613	147	40
6180	1910	4270	0.29	2	0	1	113	0	3.3750701	113	0.221613	147	40
7834.55	2133	5701.55	0.25	3	1	0	121	0	2.4277201	106	0.0702848	130	20
5740	5740	0	0	2	0	0	90	61	0.495712	201	0.0341952	175	46
4580	2980	1600	0	3	1	1	58	81	0.615075	146	0.0515512	284	49
1500	1000	500	0	4	1	0	75	88	0.214418	120	0.0532739	420	53
500	500	0	0	2	1	0	116	0	0.194027	215	0.0194716	152	104
3174.67	2134.67	1040	0.07	1	1	0	143	7	0.194027	60	0.0194716	167	135
2684.67	2134.67	550	0.12	2	0	0	86	67	0.316706	193	0.0351184	115	51
3945	560	3385	0	2	0	1	143	7	0.194027	39	0.0194716	167	135
6408.67	2134.67	4274	0.1	1	0	0	87	67	0.316706	196	0.0351184	115	51
4180	3580	600	0.15	4	1	0	54	83	0.194027	108	0.0194716	128	119
8050	6550	1500	0.44	2	1	1	261	77	0.309139	275	0.0246517	199	93
1400	1400	0	0	2	1	0	100	40	0.300769	217	0.0330164	156	65
9200	9000	200	1.8	3	1	0	129	58	0.527515	245	0.0428602	259	59
3870	2560	1310	0.4	4	1	1	155	65	0.390546	494	0.0439157	161	57
3168	3168	0	0.5	5	1	1	140	67	0.390546	261	0.0439157	193	52
3000	1600	1400	1.2	2	1	1	145	69	0.406192	231	0.0635182	219	51
700	500	200	0	4	0	0	76	60	0.300769	214	0.0330164	152	56
1440	1440	0	0.8	3	1	1	184	66	0.406192	551	0.0635182	276	50
4375	1150	3225	0.1	5	1	1	139	55	0.389876	209	0.0715938	431	50
28375	26575	1800	0.15	5	1	1	127	13	0.389876	327	0.0715938	343	50
1720	1720	0	2	4	1	0	182	28	0.549738	41	0.056318	194	50
2410	2410	0	0.45	2	1	1	164	61	0.443582	490	0.0895933	403	50
2850	500	2350	2	2	1	0	211	35	0.453157	261	0.0783948	287	50
4270	2820	1450	1	2	1	1	183	35	0.448458	371	0.0942592	356	50
15460	12330	3130	1.5	1	1	1	79	84	0.453157	188	0.0783948	287	50
13100	6600	6500	2	5	1	1	166	84	0.453157	319	0.0783948	287	50
3390	2240	1150	2	4	1	0	257	23	0.406192	204	0.0635182	225	50
1900	1500	400	2	4	1	0	139	23	0.406192	254	0.0635182	222	51
1360	1360	0	0	3	1	0	80	35	0.128338	132	0.0261059	224	77
2600	1800	800	2	1	1	0	77	84	0.389876	161	0.0715938	357	50
2035	1365	670	1.5	1	1	1	104	61	0.152104	196	0.0163087	159	53
8977	4030	4947	2	2	1	0	76	29	0.188666	76	0.0194657	232	77
8140	6240	1900	2	2	1	0	94	25	0.188666	108	0.0194657	232	77
10230	8460	1770	0.1	2	1	1	105	29	0.128338	78	0.0261059	224	77
6555	2255	4300	2	1	1	0	234	69	0.188666	325	0.0194657	232	77
7479	5319	2160	0.4	4	1	0	69	18	0.128338	120	0.0261059	224	77
2134.67	2134.67	0	0.1	2	1	1	70	16	0.453157	118	0.0783948	225	50
3645	1645	2000	0.5	1	1	1	70	88	0.453157	122	0.0783948	225	50
1848	1848	0	0	0	1	0	76	83	0.443582	127	0.0895933	445	50
2835	2170	665	0.1	3	1	0	101	68	0.448458	166	0.0942592	301	50
2876	1500	1376	0	3	1	0	118	63	0.443582	173	0.0895933	399	50
2950	2700	250	0.2	2	1	0	119	30	0.453157	104	0.0783948	165	50
1010	800	210	0.05	2	1	0	69	6	0.448458	118	0.0942592	301	50
6030	5880	150	1.63	2	1	0	69	14	0.453157	118	0.0783948	225	50
5383	4948	435	0	1	1	0	74	83	0.443582	129	0.0895933	483	50
2884.67	2134.67	750	0.13	1	0	0	50	17	0.453913	109	0.0325727	159	51
967	967	0	0	3	1	1	73	17	0.276186	122	0.0373822	219	53
0	0	0	1	1	1	0	50	17	1.10338	109	0.0636114	159	51
15608	12658	2950	0.17	1	1	1	142	80	0.453913	153	0.0325727	142	51
7609.67	2134.67	5475	0.13	6	0	0	118	64	0.453913	221	0.0325727	142	50
4984.67	2134.67	2850	0.25	1	0	0	50	17	0.48135	109	0.0482767	188	52
5515	2550	2965	0.25	2	0	1	50	17	0.48135	109	0.0482767	188	52
6734.67	2134.67	4600	1	2	1	0	50	17	0.48135	109	0.0482767	188	52
8634.67	2134.67	6500	0.12	2	0	0	119	71	0.325018	207	0.0309354	104	50
5590	4740	850	0.01	1	1	0	64	17	0.276186	119	0.0373822	219	53
6349.67	2134.67	4215	0.15	3	0	0	50	17	0.453913	109	0.0325727	159	51
5719.67	2134.67	3585	0.13	3	0	0	141	8	0.336273	220	0.0244082	207	55
3566	3566	0	0.2	2	0	0	91	8	0.515947	153	0.0663878	245	51
2978	2978	0	1.7	4	1	0	69	43	1.39379	93	0.383553	269	51
3884.67	2134.67	1750	1.75	5	1	0	66	43	1.39379	107	0.383553	250	51
4784.67	2134.67	2650	0.12	5	0	0	202	60	0.400943	136	0.0343612	186	56
20951.67	2134.67	18817	0.5	1	1	0	50	17	1.33227	109	0.218054	215	52
6704.67	2134.67	4570	0.3	4	1	0	73	43	0.515947	109	0.0663878	245	51
6320	6320	0	1.5	2	1	0	81	43	1.39379	113	0.383553	269	51
4244.67	2134.67	2110	0.1	3	1	0	50	17	0.142442	109	0.0226249	210	54
4611.67	2134.67	2477	0.12	2	0	0	67	17	0.331776	109	0.0345723	215	52
6539.67	2134.67	4405	0.09	3	0	0	50	17	0.142442	109	0.0226249	203	52
4160	2260	1900	0.6	2	1	0	74	43	1.39379	93	0.383553	250	51
10640	8540	2100	0.35	4	1	0	50	17	1.33227	109	0.218054	215	52
5844.67	2134.67	3710	0.12	3	0	0	50	17	0.276186	109	0.0373822	219	53
12652	2832.5	9819.5	0.2	1	0	0	109	8	0.465916	165	0.0388916	254	52
7492.67	2134.67	5358	0.34	3	1	0	107	8	0.515947	158	0.0663878	245	51
10334.67	2134.67	8200	0.35	4	1	0	50	43	0.536401	93	0.0538241	222	52
7184.67	2134.67	5050	0.18	3	0	0	118	29	0.465916	172	0.0388916	200	52
9364	5131	4233	0.2	4	1	1	144	9	0.465916	203	0.0388916	254	52
8560	5310	3250	0.2	4	0	1	202	60	0.465916	141	0.0388916	200	52
7810	6270	1540	0.4	1	1	0	50	17	1.33227	109	0.218054	215	52
7449.67	2134.67	5315	0.35	2	1	0	72	43	0.536401	93	0.0538241	222	52
7478.67	2134.67	5344	0.13	2	0	0	116	63	0.400943	194	0.0343612	208	66
2634.67	2134.67	500	0.5	2	1	0	83	33	0.270488	115	0.0417451	589	50
6853.67	2134.67	4719	0.65	3	1	0	78	33	0.270488	106	0.0417451	372	54
4039.67	2134.67	1905	0.5	4	1	0	69	33	0.270488	93	0.0417451	589	50
2509.67	2134.67	375	0.6	2	1	0	72	38	0.226594	146	0.0372735	204	56
10285.67	2134.67	8151	1.2	2	1	0	62	38	0.226594	87	0.0372735	204	56
6089.67	2134.67	3955	0.6	1	1	0	63	38	0.226594	106	0.0372735	204	56
4984.67	2134.67	2850	0.6	2	1	0	65	38	0.226594	87	0.0372735	283	61
9961.67	2134.67	7827	0.18	2	0	0	625	0	1.47357	74	0.0919753	333	50
7054.67	2134.67	4920	0	2	0	0	625	0	1.47357	74	0.0919753	333	50
4883.67	2134.67	2749	0.16	1	0	0	625	0	1.47357	74	0.0919753	333	50
6184.67	2134.67	4050	0.07	1	0	0	625	0	1.47357	75	0.0919753	333	50
7910.67	2134.67	5776	0.1	2	0	0	623	0	1.47357	74	0.0919753	462	50
3587	3075	512	1.3	3	1	0	54	61	0.0049992	123	0	-999	1250
9810	8040	1770	1.6	2	1	0	100	4	0.271504	119	0.112529	602	177
25700	23950	1750	1.55	2	1	0	67	61	0.0049992	125	0	-999	1250
7100	3700	3400	1.3	2	1	1	70	38	0.0049992	156	0	-999	1250
14414	10814	3600	1.6	1	1	1	77	4	0.149004	97	0.0434028	640	55
38125	26625	11500	1.6	2	1	0	91	4	0.149004	127	0.0434028	640	55
57396	12381	45015	0.7	1	0	0	175	13	0.675525	271	0.0986411	269	40
14018	10418	3600	0.56	4	1	1	132	103	0.675525	197	0.0986411	269	40
22659	15874	6785	1.52	1	1	0	108	13	0.688968	213	0.0255226	378	46
21703	14158	7545	0.5	4	0	0	79	16	0.675525	114	0.0986411	310	34
23975	14775	9200	0.8	3	1	0	148	15	0.675525	220	0.0986411	301	22
48130	25450	22680	0.82	3	1	0	62	19	0.675525	92	0.0986411	269	40
32890	19870	13020	0.95	2	1	0	214	59	0.816527	481	0.123265	379	48
49100	31900	17200	1.1	5	0	0	94	39	2.4270501	146	0.36935	399	15
33175	30500	2675	1.5	2	1	0	57	63	3.5388701	104	0.478118	438	14
17500	13750	3750	0.65	2	1	0	115	88	0.675525	213	0.0986411	301	22
35018	20618	14400	0.86	3	1	0	101	14	0.675525	235	0.0986411	310	34
6406	3206	3200	0.53	2	1	0	107	4	0.149004	162	0.0434028	542	101
119681	93566	26115	0.5	80	1	1	107	4	0.149004	162	0	542	101
19950	10950	9000	2	2	0	0	77	4	0.653989	116	0.0393203	545	92
27500	14350	13150	0.07	3	1	1	107	4	0.149004	162	0	542	101
24005	12730	11275	0.8	4	0	0	80	4	0.593996	142	0.100845	323	74
29300	19500	9800	0.1	3	0	0	107	4	0.149004	162	0	542	101
13975	5135	8840	1.6	5	1	0	151	4	0.593996	214	0.100845	323	74
7840	5260	2580	1.6	1	1	1	125	38	0.254001	195	0.10544	358	69
2134.67	2134.67	0	0	2	0	1	120	0	1.35034	159	0.310385	472	19
274118	134070	140048	1	39	1	1	119	0	0.443124	180	0.0148358	287	56
6400	3000	3400	0.4	2	1	0	100	0	0.320704	162	0.0189549	179	56
12625	12625	0	0.02	3	0	0	119	84	0.222555	98	0.0634035	221	46
8184.67	2134.67	6050	0.5	2	1	0	550	71	0.348488	183	0.0374663	176	46
825	825	0	0.1	4	0	1	150	0	0.246985	232	0.0140314	245	29
3000	2750	250	0.15	1	0	0	140	0	0.547775	162	0.0339731	231	44
14787	13387	1400	0.07	4	0	1	96	0	0.246985	166	0.0140314	245	29
10210	8710	1500	0.15	1	0	1	128	0	0.443124	150	0.0148358	221	56
6455	5715	740	0.12	3	0	1	103	0	0.246985	171	0.0140314	186	52
7700	7700	0	0.1	3	0	1	102	0	0.246985	162	0.0140314	231	44
2250	2250	0	0.12	2	0	1	209	0	0.320704	213	0.0189549	164	50
7200	7200	0	0.2	2	0	1	109	0	0.359872	159	0.0244074	117	51
43975	40775	3200	0.2	2	0	0	107	0	0.320704	164	0.0189549	179	56
7650	7500	150	0.1	4	0	1	126	0	0.320704	171	0.0189549	260	53
28250	28250	0	0.1	3	0	1	178	0	0.231615	254	0.0119754	171	55
21765	21765	0	0.3	4	0	1	147	0	1.70644	117	0.74892	256	19
25905	14730	11175	0.2	2	0	0	146	0	0.883581	195	0.0924698	223	30
27725	27725	0	0.2	3	0	1	126	0	0.883581	238	0.0924698	223	30
49610	38685	10925	0.2	3	0	1	131	0	0.883581	183	0.0924698	168	49
4250	1200	3050	1.4	5	1	0	103	20	0.616009	176	0.139896	210	104
6700	5200	1500	1.4	4	1	0	80	20	0.524475	151	0.110221	210	104
2428	2178	250	1.3	3	1	0	71	20	0.524475	151	0.110221	210	104
4250	4250	0	1.5	4	1	0	58	20	0.616009	151	0.139896	223	63
1898	600	1298	0.15	4	1	0	48	26	0.812236	146	0.0376035	231	47
4440	4440	0	1.2	3	1	0	50	26	0.812236	146	0.0376035	233	39
2424	1224	1200	1.36	2	1	0	75	25	1.51811	146	0.130509	236	11
1695	495	1200	1	4	1	0	78	25	1.51811	146	0.130509	236	11
8600	3600	5000	2.2	7	1	1	148	10	2.2219801	266	0.311678	604	5
8570	7670	900	0.35	2	1	1	176	30	0.954095	257	0.13236	118	48
14340	10365	3975	0.3	2	1	1	178	41	0.489973	116	0.126691	128	43
24035	10615	13420	1	2	0	0	132	38	1.2729	183	0.171899	323	12
20685.95	2780.95	17905	1	2	1	0	42	25	1.2729	95	0.171899	266	11
4665	4665	0	0.15	2	0	0	95	2	0.0990162	130	0.008269	154	70
13024.95	2780.95	10244	0.05	4	0	1	75	2	0.0874019	104	0.007653	199	56
5960.95	2780.95	3180	0.25	5	0	0	77	2	0.286784	108	0.0103564	138	56
5036.95	2780.95	2256	0	3	0	0	77	2	0.0874019	121	0.007653	162	72
2780.95	2780.95	0	0	0	1	1	517	42	0.412596	101	0.453401	187	46
29840	19540	10300	0.5	2	1	0	279	123	1.34041	131	0.11492	207	18
22780	11300	11480	0.88	4	0	0	127	123	1.34041	212	0.11492	197	23
14450	7250	7200	0.3	4	1	1	269	123	0.815358	262	0.048793	206	52
17300	12800	4500	0.75	1	1	1	188	68	1.35137	245	0.0525624	239	10
29770	8550	21220	0.4	4	0	1	129	15	1.00793	168	0.0936441	229	12
13100	9200	3900	0.45	2	1	1	112	23	1.1901	151	0	197	14
16120	14720	1400	0.45	2	0	1	112	23	1.1901	151	0	197	14
14300	4850	9450	0.53	3	0	1	112	23	1.1901	151	0.236215	197	14
2000	2000	0	1.7	4	1	1	134	27	1.52391	134	0.378735	202	16
4800	4800	0	0	4	0	0	112	23	1.1901	151	0	197	14
7620	4700	2920	0.25	4	1	1	112	23	1.1901	151	0	197	14
4180.95	2780.95	1400	0	4	1	1	112	23	1.1901	151	0	197	14
17580	7180	10400	0.2	3	1	1	112	23	1.1901	151	0	197	14
12738	9948	2790	0.4	2	0	0	211	41	0.881124	333	0.18019	180	43
7440	6710	730	0.25	2	0	0	156	28	0.63654	203	0.0736234	243	50
5150	2500	2650	0.26	4	1	1	108	35	0.961946	64	0.137056	503	42
16490	14890	1600	0.35	2	0	1	108	88	0.961946	184	0.137056	560	39
9400	3650	5750	0.65	2	0	0	317	27	1.18743	183	0.246528	538	30
4530	3800	730	0.21	1	0	0	85	37	0.533991	137	0.0701233	175	67
25250	19550	5700	0.4	4	0	1	114	35	0.961946	96	0.137056	595	47
11500	7100	4400	0.7	4	0	1	82	16	0.945982	96	0.24701	421	50
13300	6150	7150	0.6	3	0	0	279	123	0.930552	329	0.121917	544	44
10790	8190	2600	0.03	0	0	1	107	70	0.533991	126	0.0701233	179	66
9110	6260	2850	0.6	4	0	0	79	36	0.92956	149	0.32683	540	40
34560	18310	16250	0.75	6	1	1	204	93	0.961946	336	0.137056	435	41
21535	10585	10950	0.35	3	1	1	377	116	0.650927	533	0.086885	217	50
23310	7800	15510	0.42	1	0	0	149	14	0.669252	343	0.0755073	138	50
40520	20820	19700	0.46	3	1	1	207	18	0.765415	143	0.190756	134	50
17900	16500	1400	0.37	2	1	0	165	34	0.655414	270	0.0652318	245	49
20935	12535	8400	0.5	6	1	1	154	68	0.788261	180	0.107574	353	50
25065	18965	6100	0.53	2	1	1	347	93	0.840277	197	0.179057	209	50
20270	15070	5200	0.6	3	0	1	165	32	0.894691	276	0.160897	398	50
22377	2820	19557	0.52	3	0	1	155	66	0.788261	98	0.107574	353	50
124410	49737	74673	0.3	4	1	1	157	40	0.605653	198	0.120572	465	43
6242	2482	3760	0.27	6	0	1	132	13	0.29425	148	0.0484281	286	52
2792.5	2342.5	450	1	4	1	1	120	37	0.35814	146	0.0510895	308	51
10350	6700	3650	1.57	2	1	1	70	38	0.35814	129	0.0510895	311	52
6361.5	6361.5	0	0.02	2	0	1	134	24	0.256105	159	0	102	54
11555	5962	5593	0.4	6	0	1	99	30	0.29425	127	0.0484281	286	52
14610	14010	600	0.15	4	1	1	134	24	0.256105	159	0.0458676	102	54
7080	6080	1000	0.2	3	1	1	228	63	0.406992	221	0.0283821	286	49
2274	1024	1250	0	4	1	0	1572	45	0.0458665	95	0.0288779	336	148
2950	2100	850	1	5	1	1	146	10	0.557458	575	0.0501144	136	50
11005.95	2780.95	8225	0	1	0	1	1572	45	0.0458665	95	0	336	148
28920	6170	22750	0.07	0	0	1	160	83	0.379128	188	0.0414623	374	50
58930	33480	25450	0.4	4	0	1	142	3	0.520532	128	0.0490856	413	50
5131	3931	1200	0.8	4	1	1	112	21	1.80483	145	0.080351	270	40
5720	3420	2300	2.2	1	1	0	111	33	0.677992	198	0.239637	382	49
5980.95	2780.95	3200	0.8	1	0	0	168	90	0.668167	246	0.198608	422	39
6652	5154	1498	0.15	2	1	1	110	103	0.496999	165	0.113022	274	45
4610.95	2780.95	1830	0.5	3	1	0	283	103	0.550942	450	0.159771	380	34
85590	8590	77000	0.42	1	0	1	220	23	0.496999	292	0.113022	285	39
5440.95	2780.95	2660	0.15	2	1	0	90	37	0.512577	171	0.0785701	404	21
9525.95	2780.95	6745	0.82	4	1	1	135	83	0.512577	195	0.0785701	344	28
5150	2300	2850	0.13	6	1	0	192	73	0.599946	163	0.0614752	169	50
4690	2750	1940	0.38	2	1	0	120	88	0.794715	293	0.0379745	231	37
23306	12066	11240	0.62	2	1	0	100	40	0.794715	40	0.0379745	231	37
9930.95	2780.95	7150	1.07	1	1	0	66	44	1.01669	90	0.0652125	402	18
13555.95	2780.95	10775	1.31	2	1	0	93	44	1.01669	140	0.0652125	440	12
26920	12090	14830	1	2	0	0	53	44	1.00491	90	0.0843998	344	16
47180	23540	23640	1.05	2	1	0	65	44	1.01669	90	0.0652125	402	18
17414.95	2780.95	14634	1.27	1	1	0	84	44	1.01669	154	0.0652125	440	12
34045	26450	7595	1.06	4	1	0	69	44	1.01669	90	0.0652125	402	18
16520	9200	7320	0.55	4	1	0	143	46	0.766636	91	0.0721747	401	45
16980.95	2780.95	14200	0.6	5	1	0	104	18	0.935797	190	0.0667221	419	22
22200	18700	3500	0.3	6	1	1	181	103	0.675432	163	0.0686707	340	46
26780.95	2780.95	24000	0	1	1	1	83	113	0.442421	179	0.0840384	277	47
31369	4500	26869	0	3	1	1	83	113	0.442421	179	0	277	47
18373	12881	5492	0.6	2	1	0	143	46	0.766636	132	0.0721747	401	45
27165	25515	1650	0.7	2	1	1	87	15	0.935797	200	0.0667221	362	39
17068.95	2780.95	14288	0.35	2	0	0	98	93	0.697452	165	0.106656	212	48
17590	12160	5430	0.15	2	1	0	93	113	0.442421	177	0.0840384	277	47
16565	12915	3650	0.4	1	1	1	134	53	0.604201	227	0.0836205	300	49
9642	7902	1740	0.45	4	1	0	82	19	0.646592	160	0.0850784	212	48
14497	10610	3887	0.2	2	0	0	197	45	0.604201	119	0.0836205	300	47
7029	4199	2830	0.15	6	1	1	170	68	0.16951	171	0	261	53
7831	4156	3675	0.2	5	1	1	396	78	0.41902	160	0.0687966	222	50
30800	18975	11825	0.42	2	1	1	79	88	0.646592	140	0.0850784	229	44
4730.95	2780.95	1950	0.45	1	0	0	74	14	0.640158	84	0.111639	274	58
8095	5429	2666	0.15	2	0	0	326	123	0.487917	87	0.100309	196	57
248	248	0	0	2	0	0	326	123	0.487917	72	0.100309	196	57
2810	2100	710	0.1	2	1	0	326	123	0.487917	174	0.100309	196	57
1200	880	320	0	4	1	1	70	14	0.411927	84	0.0482122	209	68
3130.95	2780.95	350	0	1	1	0	77	24	0.0825329	159	0.0213278	170	88
5315.95	2780.95	2535	0.3	1	0	0	71	14	0.640158	84	0.111639	274	58
18309	6261	12048	0	1	1	1	100	12	0.0825329	117	0.0213278	170	88
12354.95	2780.95	9574	0.7	2	1	0	73	33	1.07867	121	0.0722858	288	50
16993	8625	8368	0.7	2	1	1	72	33	1.07867	121	0.0722858	282	50
15895.95	2780.95	13115	0.6	4	1	0	65	34	1.03227	129	0.0647486	283	50
29200	9400	19800	0.6	1	1	0	116	39	1.03227	166	0.0647486	292	50
28791	16270	12521	0.6	2	1	1	75	34	1.03227	140	0.0647486	283	50
20459.95	2780.95	17679	0.57	2	0	0	73	34	0.967748	129	0.0653437	288	50
27084	18610	8474	0.5	4	1	1	102	23	0.763591	138	0.0861075	292	50
27494.95	2780.95	24714	0.7	1	1	0	64	33	1.07867	121	0.0722858	288	50
25666	10367	15299	0.5	1	0	0	104	23	0.763591	138	0.0861075	292	50
18200	15150	3050	0.6	2	1	0	139	39	1.03227	139	0.0647486	292	50
20550	11660	8890	0.5	4	0	0	57	40	0.640158	117	0.111639	330	52
11180.95	2780.95	8400	0.25	2	0	0	72	14	0.411927	99	0.0482122	209	68
15130	5130	10000	0.5	2	1	0	64	35	0.980426	121	0.0669949	296	50
9490	3490	6000	0.5	2	1	0	54	40	0.980426	104	0.0669949	278	51
12745	8245	4500	0.5	2	1	0	88	39	0.980426	111	0.0669949	278	51
16820.95	2780.95	14040	0.58	2	1	0	66	40	0.980426	104	0.0669949	278	51
6180.95	2780.95	3400	0.25	1	0	0	72	14	0.411927	84	0.0482122	238	59
6000	3600	2400	0.35	2	0	1	72	14	0.411927	84	0.0482122	238	59
27738	21525	6213	0.5	2	1	1	102	25	0.653323	131	0.0574941	253	54
24930.95	2780.95	22150	0.62	2	1	0	66	35	1.07867	121	0.0722858	292	50
20750	8750	12000	0.5	2	1	0	97	25	0.653323	122	0.0574941	253	54
17425.95	2780.95	14645	0.62	1	1	0	72	35	1.07867	121	0.0722858	292	50
23595	10050	13545	0.4	2	1	0	71	14	0.411927	84	0.0482122	209	68
20140	11060	9080	0.85	2	1	1	65	35	1.07867	121	0.0722858	291	50
18620.95	2780.95	15840	0.55	1	1	0	77	35	0.980426	143	0.0669949	296	50
17410	2810	14600	0.3	3	0	0	77	25	0.411927	125	0.0482122	238	59
5823	4425	1398	2.05	3	1	1	134	15	0.890129	186	0.0621897	297	50
6700.95	2780.95	3920	0.4	1	0	1	93	44	0.81208	95	0.0564289	283	50
2875	800	2075	1.35	2	1	1	101	25	0.890129	203	0.0621897	297	50
7230.95	2780.95	4450	0.36	4	1	0	54	113	0.81208	102	0.0564289	283	50
8072	6622	1450	0.7	4	0	0	116	0	0.877321	250	0.0616711	298	50
13044	8724	4320	0.6	5	1	0	82	193	0.675131	144	0.0402658	195	50
11230	8380	2850	0.75	4	0	1	44	43	0.741747	50	0.0603775	243	50
9010	5810	3200	0.64	2	0	0	126	103	0.741747	166	0.0603775	243	50
15890	7040	8850	0.75	2	1	1	143	16	0.741747	122	0.0603775	269	50
14570	8970	5600	0.8	2	1	0	103	43	0.741747	129	0.0603775	243	50
37995	16500	21495	1.1	3	1	1	136	54	0.874542	162	0.0537307	295	50
18557	10457	8100	1.12	2	0	1	121	31	0.874542	146	0.0537307	295	50
17760	13410	4350	0.45	3	1	0	137	143	0.675131	217	0.0402658	195	50
19741	4791	14950	0.67	5	1	1	84	83	0.741747	93	0.0603775	243	50
20145	16745	3400	0.42	3	1	0	80	328	0.675131	106	0.0402658	229	46
11439	4039	7400	0.75	1	1	0	133	113	0.72978	212	0.0610055	247	50
6530.95	2780.95	3750	0.53	4	1	0	170	103	0.675131	34	0.0402658	195	50
13755	9525	4230	0.8	2	0	0	117	123	0.72978	133	0.0610055	247	50
12750	11750	1000	0.11	2	1	0	170	103	0.675131	49	0.0402658	195	50
0	0	0	0.9	4	1	0	421	83	0.817126	526	0.0741952	266	49
14205	11505	2700	0.65	2	1	0	67	83	0.72978	85	0.0610055	237	50
19405	14890	4515	0.75	3	1	0	97	123	0.72978	139	0.0610055	237	50
27450.95	2780.95	24670	1.2	2	1	0	97	63	0.877321	137	0.0616711	266	50
30567	9467	21100	0.9	3	1	0	158	83	0.81208	156	0.0564289	283	50
19579	16639	2940	0.6	2	1	1	81	83	0.72978	85	0.0610055	237	50
40608	16085	24523	0.94	4	1	0	68	113	0.877321	98	0.0616711	266	50
20950	6930	14020	0.59	2	1	0	170	103	0.675131	65	0.0402658	195	50
8500	8500	0	1.8	3	1	1	175	73	0.16951	217	0.0309655	132	54
4090	1765	2325	2.25	2	1	1	102	4	0.41902	162	0.0687966	235	58
2000	2000	0	1.7	5	1	0	123	73	0.16951	142	0.0309655	116	78
9990	5440	4550	0.4	4	1	0	63	23	0.744587	112	0.0928169	490	45
15300	9250	6050	1.41	2	1	0	205	23	0.829481	281	0.101973	413	25
5425	5425	0	0.75	2	0	0	126	24	0.744587	138	0.0928169	444	35
1275	475	800	0.2	1	0	1	67	19	0.675432	113	0.0686707	384	45
9701	3051	6650	1.4	2	0	0	76	20	0.829481	106	0.101973	413	25
4630.95	2780.95	1850	0.17	2	1	0	75	103	0.675432	150	0.0686707	340	46
16300	7500	8800	0.2	4	1	0	62	19	0.675432	106	0.0686707	384	45
9130.95	2780.95	6350	1.5	2	1	0	80	20	0.829481	121	0.101973	413	25
10882.95	2780.95	8102	0.25	2	0	0	65	23	0.744587	112	0.0928169	490	45
25460.95	2780.95	22680	1.5	2	1	0	79	20	0.829481	106	0.101973	465	33
17200	11800	5400	1.35	2	1	0	77	31	0.792627	126	0.101893	412	41
34800	17750	17050	1.3	2	1	0	110	31	0.792627	154	0.101893	412	41
33589	21947	11642	2	3	1	1	62	20	0.829481	106	0.101973	465	33
21860	5810	16050	1.3	2	0	0	68	68	0.792627	108	0.101893	167	50
11980	8280	3700	1	2	1	1	135	123	1.12528	225	0.071868	289	13
12080.95	2780.95	9300	0.2	2	0	1	103	62	0.5673	167	0.0970183	293	41
2500	2500	0	2	2	1	1	269	188	1.12528	298	0.071868	289	13
2550	1000	1550	0.05	2	0	1	83	61	0.5673	139	0.0970183	293	41
400	0	400	1	2	1	1	153	2	1.06862	140	0.097788	324	11
17000	10050	6950	1	3	0	0	128	24	1.03829	115	0.0455905	261	15
3660	3260	400	0.5	4	1	1	149	34	0.920981	198	0.159953	321	31
0	0	0	0.6	2	0	1	131	30	0.920981	157	0.159953	304	24
16060	8660	7400	0.7	2	1	1	142	5	1.03829	164	0.0455905	261	15
21210	15360	5850	0.5	2	0	1	151	45	0.633885	162	0.143425	272	11
22938.6	10939.85	11998.75	0.2	1	1	1	98	61	0.5673	216	0.0970183	273	49
36050	27050	9000	1.2	1	1	0	127	123	1.12528	158	0.071868	253	11
22350	7350	15000	1.9	3	1	1	118	21	1.12528	234	0.071868	253	11
5232	4732	500	1.8	1	1	1	91	61	0.5673	117	0.0970183	285	43
975	375	600	1.5	2	1	1	163	29	0.562194	170	0.0758191	277	45
5150	2200	2950	0	1	1	1	97	27	0.358181	174	0.0797526	157	47
17060	13135	3925	0.1	4	1	1	94	70	0.461762	120	0.0590624	233	46
7106	7106	0	1.9	3	1	1	104	61	0.5673	142	0.0970183	285	43
4240	3740	500	0	4	1	0	94	23	0.453939	168	0.104364	119	49
6850	3500	3350	1.7	0	1	1	101	44	0.868164	201	0.302404	132	14
11200	4050	7150	0.4	2	0	1	179	63	0.761011	249	0.236805	244	45
32930	6930	26000	0.15	3	1	1	130	17	0.66281	199	0.32489	194	45
9100	5700	3400	0.6	3	1	0	109	41	0.92528	120	0.0743457	249	28
9490	3010	6480	0.15	1	1	0	78	68	0.774178	152	0.172291	340	39
15680.95	2780.95	12900	0.6	2	1	0	81	29	0.813905	117	0.0713153	249	28
16850	9900	6950	0.75	1	1	0	142	123	0.92528	38	0.0743457	221	11
8280.95	2780.95	5500	1	2	0	0	263	133	1.12528	83	0.071868	289	13
12470	4270	8200	0.3	2	1	1	64	68	0.792627	184	0.101893	340	39
4970.95	2780.95	2190	0.6	4	1	0	102	8	0.813905	116	0.0713153	249	28
17500	7500	10000	0.15	1	1	0	67	68	0.774178	115	0.172291	340	39
17800	13500	4300	0.15	3	1	0	67	68	0.774178	115	0	340	39
34695	16500	18195	0.8	3	0	0	95	73	1.00491	196	0.0843998	353	23
18750	15900	2850	0.6	4	1	1	50	29	0.813905	104	0.0713153	240	31
43550	30650	12900	0.85	2	1	1	114	40	1.00491	175	0.0843998	319	14
25200	11800	13400	0.5	4	0	0	125	73	0.792627	120	0.101893	353	23
19550	6700	12850	0.6	2	1	0	61	29	0.813905	123	0.0713153	249	28
1290	1290	0	1	2	1	1	80	41	0.750169	131	0.136747	390	44
7180.95	2780.95	4400	0.2	1	1	1	118	42	0.570248	148	0.0623219	410	50
4980.95	2780.95	2200	2	1	1	0	88	26	0.806238	159	0.0773013	422	47
9500	1800	7700	2	2	1	1	82	26	0.806238	159	0.0773013	434	48
8410	4210	4200	0.2	1	1	1	111	45	0.5673	171	0.0970183	329	46
3021	1458	1563	0.05	3	0	0	94	24	0.504231	65	0.0373088	275	50
2728	2728	0	0.05	3	1	0	151	63	0.232643	211	0.0113837	264	48
22300	17300	5000	0.35	2	1	1	122	55	0.695879	173	0.0728851	358	48
225	225	0	2	2	1	1	82	63	0.596249	159	0.046711	297	50
6546	4846	1700	0	5	1	0	58	5	0.356844	87	0.0709128	178	48
11047	10007	1040	0.22	5	1	1	157	73	0.362806	195	0.0638423	158	47
11577	2952	8625	0.15	2	0	0	79	61	0.362806	121	0.0638423	158	47
4600.95	2780.95	1820	0.4	1	1	1	55	28	1.0973099	93	0	603	50
15930.95	2780.95	13150	0.7	2	0	0	55	28	1.0973099	93	0	603	50
15740.95	2780.95	12960	0.7	1	0	0	55	28	1.0973099	93	0	603	50
8550.95	2780.95	5770	0.4	1	0	0	55	28	1.0973099	93	0	603	50
28370.95	2780.95	25590	1.3	1	1	0	88	28	1.0973099	101	0.0888558	603	50
19700.95	2780.95	16920	0.4	2	0	0	55	28	1.0973099	93	0	603	50
19324.95	2780.95	16544	1.2	4	1	0	55	28	1.0973099	93	0.0888558	603	50
33554.95	2780.95	30774	0.6	1	0	0	55	28	1.0973099	93	0	603	50
23265.95	2780.95	20485	1.5	3	1	0	72	28	1.0973099	99	0.0888558	592	50
24460.95	2780.95	21680	0.7	1	0	0	55	28	1.0973099	93	0	603	50
11370	6510	4860	1.12	2	1	1	81	21	1.00525	113	0.0910411	611	50
14644	8080	6564	0.7	2	1	1	136	27	1.00525	88	0.0910411	611	50
27301	16596	10705	1.15	1	1	0	88	21	1.00525	134	0.0910411	592	50
8880.95	2780.95	6100	0.8	1	0	0	54	22	0.931892	116	0.111319	535	50
11370	7320	4050	0.65	3	0	0	71	22	0.931892	108	0.111319	521	50
15630.95	2780.95	12850	0.87	4	0	1	91	25	0.932693	91	0.0601354	563	50
8649	5685	2964	0.85	3	1	1	74	25	0.932693	91	0.0601354	563	50
0	0	0	0.8	1	0	0	63	22	0.931892	107	0.111319	535	50
14785	9185	5600	0.81	2	1	0	80	25	0.932693	91	0.0601354	563	50
29070	10970	18100	0.7	5	0	0	57	22	0.931892	107	0.111319	535	50
30580.95	2780.95	27800	1.2	1	0	0	69	22	0.975938	136	0.0782678	538	50
32290	3600	28690	0	4	1	1	89	17	0.744587	161	0	510	48
17200.95	2780.95	14420	0.92	5	0	0	60	22	0.933791	116	0.0951771	486	49
17270	7650	9620	0.8	5	0	0	80	22	0.931892	107	0.111319	521	50
20375	7775	12600	0.93	2	0	0	51	22	0.933791	108	0.0951771	530	50
18015	12715	5300	1.04	2	0	0	73	22	0.975938	116	0.0782678	538	50
43247.95	2780.95	40467	0.98	2	1	0	73	22	0.933791	108	0.0951771	486	49
16100	9100	7000	1	4	0	1	81	25	0.975938	91	0.0782678	581	50
9200	7500	1700	0.35	4	0	0	91	22	0.74116	124	0.0570791	520	50
12400	12400	0	0.3	4	0	0	67	22	0.559339	116	0.0688882	504	47
7935	7260	675	0.3	2	0	0	69	22	0.559339	108	0.0688882	504	47
10119	8819	1300	0.8	2	1	0	112	22	0.931892	107	0.111319	569	50
15765	10040	5725	0.7	3	0	0	89	22	0.931892	107	0.111319	569	50
7400	4700	2700	0.35	2	1	0	50	22	0.559339	108	0.0688882	504	47
13766	6520	7246	0.7	2	0	0	50	22	0.931892	108	0.111319	566	50
9672	1950	7722	0.3	3	0	0	69	22	0.559339	116	0.0688882	504	47
34625.95	2780.95	31845	0.95	2	0	0	75	25	0.975938	91	0.0782678	581	50
30620	8395	22225	0.78	1	0	0	74	22	0.931892	108	0.111319	566	50
27756.95	2780.95	24976	0.95	4	1	0	65	22	0.975938	114	0.0782678	582	50
28555	9255	19300	0.97	2	1	0	81	22	0.975938	114	0.0782678	582	50
25410	8010	17400	0.84	4	0	0	70	25	0.932693	107	0.0601354	592	50
35935	21000	14935	0.85	2	0	0	49	22	0.933791	108	0.0951771	530	50
29600	12800	16800	1.1	4	0	0	67	22	0.975938	114	0.0782678	582	50
19300	15850	3450	0.71	5	0	0	97	22	0.931892	131	0.111319	569	50
22355	11355	11000	0.68	4	0	0	78	22	0.74116	123	0.0570791	530	50
7780.95	2780.95	5000	0.13	1	0	0	85	4	0.356844	125	0.0709128	197	50
6980.95	2780.95	4200	0.15	3	0	0	100	3	0.51168	102	0.100314	419	68
6070.95	2780.95	3290	0.14	2	0	0	92	4	0.356844	135	0.0709128	197	50
7585	7585	0	0.08	2	0	0	56	4	0.255498	119	0.152148	190	49
5580.95	2780.95	2800	0.15	5	0	0	87	3	0.51168	102	0.100314	317	54
7850	2150	5700	0.15	2	0	0	117	3	0.51168	116	0.100314	419	68
11726	4126	7600	0.2	4	0	0	52	5	0.589025	94	0.110497	334	50
11739.95	2780.95	8959	0	4	0	0	39	4	0.245007	92	0.0389113	426	119
9772.95	2780.95	6992	0.15	2	0	0	50	5	0.41116	94	0.10267	316	50
9030.95	2780.95	6250	0.15	4	0	0	68	5	0.41116	94	0.10267	316	50
9761.95	2780.95	6981	0.18	2	0	0	78	3	0.51168	102	0.100314	317	54
5500	500	5000	0.15	3	0	0	50	5	0.41116	94	0.10267	316	50
12430	5630	6800	0.2	6	0	0	66	5	0.589025	94	0.110497	316	50
3890.95	2780.95	1110	0.1	3	0	0	95	4	0.356844	119	0.0709128	190	49
9980.95	2780.95	7200	0.15	4	0	0	90	5	0.41116	112	0.10267	316	50
12505	5620	6885	0.06	1	0	0	73	4	0.255498	125	0.152148	190	49
12845	5620	7225	0.06	1	0	0	52	3	0.245007	102	0.0389113	469	192
19030.95	2780.95	16250	0.2	1	0	0	81	3	0.51168	102	0.100314	317	54
12075	9800	2275	0.15	4	0	0	52	3	0.589025	102	0.110497	442	59
9330	7020	2310	0.18	2	0	0	102	3	0.589025	140	0.110497	442	59
12160	11500	660	0.4	2	0	0	84	3	0.790572	120	0.079472	340	51
8420	4920	3500	0.14	1	0	0	159	0	0.535651	163	0.0274158	438	75
8229	5470	2759	0.15	2	0	0	92	0	0.535651	117	0.0274158	505	234
14480	11730	2750	0.25	1	0	0	103	3	0.589025	102	0.110497	337	50
30435	17750	12685	0.23	2	0	1	85	3	0.589025	146	0.110497	337	50
2075	1825	250	0.15	2	0	0	92	3	0.790572	115	0.079472	262	50
2175	2175	0	0.15	4	0	0	99	3	0.790572	119	0.079472	224	50
6820	4820	2000	0.1	2	0	0	65	1	0.54507	112	0.109035	212	50
9800	9800	0	0.1	2	0	0	91	1	0.223981	126	0.156061	220	51
6550	4550	2000	0.2	2	0	0	95	3	0.790572	145	0.079472	262	50
8883	7333	1550	0.14	2	0	0	77	0	0.622304	101	0.085123	236	58
3125	2825	300	0.08	2	0	0	75	0	0.223981	93	0.156061	220	51
9755	5855	3900	0.1	1	0	0	98	1	0.223981	97	0.156061	219	52
7270	4770	2500	0.1	4	0	0	84	1	0.223981	131	0.156061	219	52
5645	5645	0	0.1	1	0	0	120	1	0.223981	122	0.156061	219	52
9985	9285	700	0.1	2	0	0	94	0	0.223981	93	0.156061	236	58
10265	10265	0	0.1	4	0	0	95	1	0.223981	97	0.156061	220	51
7600	4950	2650	0.1	1	0	0	77	0	0.223981	133	0.156061	219	52
10350	5350	5000	0.1	1	0	0	50	1	0.223981	97	0.156061	219	52
10550	10550	0	0.15	4	0	0	84	3	0.790572	101	0.079472	262	50
16450	3800	12650	0.6	1	1	1	176	30	0.772525	103	0.0321524	544	56
15280	12930	2350	0.35	2	0	1	230	113	0.38756	139	0.0604178	364	50
13930.95	2780.95	11150	1	1	0	0	207	32	0.913404	185	0.0696284	537	52
15525	2625	12900	0.25	2	1	0	85	113	0.38756	123	0.0604178	382	51
13680	6700	6980	0.7	2	1	0	110	30	0.794295	138	0.057627	524	52
42360	31310	11050	0.4	2	1	1	114	27	0.640217	151	0.0292519	541	51
36180	15030	21150	0.35	5	0	1	133	113	0.38756	100	0.0604178	382	51
27845	11345	16500	0.4	3	1	1	190	22	0.622454	162	0.025401	482	105
32550	21700	10850	0.25	2	1	1	85	113	0.38756	123	0	382	51
22030.95	2780.95	19250	0.6	4	1	0	132	24	0.772525	128	0.0321524	544	56
19125	12525	6600	1	3	0	0	60	30	0.913404	105	0.0696284	595	50
37580	10580	27000	0.4	4	0	1	159	73	0.443645	139	0.0387113	364	53
24295	12995	11300	0.4	3	1	1	133	17	0.443645	143	0.0387113	364	53
17900	5900	12000	2.1	2	1	1	116	30	0.913404	114	0.0696284	558	52
29750	24150	5600	0.6	2	1	0	102	30	0.74116	123	0.0570791	499	52
8780.95	2780.95	6000	0.4	4	0	0	113	4	0.640217	165	0.0292519	544	51
8500	2300	6200	0.1	2	1	1	177	28	0.505755	85	0.0350233	558	52
11920	8520	3400	0.45	2	0	1	150	32	0.772525	129	0.0321524	523	54
12300	5500	6800	0.45	3	1	1	89	23	0.772525	127	0.0321524	523	54
16900	16250	650	0.28	4	0	0	76	29	0.622454	107	0.025401	541	56
10855	6005	4850	0.15	3	1	0	188	28	0.505755	221	0.0350233	476	53
9560	9560	0	0	2	1	1	177	28	0.505755	80	0.0350233	500	53
25050	5200	19850	0.4	3	1	0	162	35	0.640217	134	0.0292519	511	54
24620	7870	16750	0.3	6	1	0	79	23	0.622454	130	0.025401	541	56
67695	32195	35500	0.5	4	1	1	75	32	0.772525	129	0.0321524	523	54
13440	12550	890	1.1	2	0	1	72	29	0.977191	93	0.0382265	579	51
8015	5555	2460	0.45	3	0	1	75	27	0.596249	101	0.046711	405	50
21960	12360	9600	0.5	2	0	0	98	27	0.596249	103	0.046711	405	50
18310	10700	7610	0.8	4	0	0	129	21	0.956868	168	0.0733802	540	51
21135	18340	2795	0.65	2	0	0	75	26	0.956868	95	0.0733802	405	50
30070.95	2780.95	27290	1.26	3	0	0	43	28	0.977191	88	0.0382265	559	52
43715	18550	25165	1.2	2	0	0	81	29	0.977191	88	0.0382265	532	81
19940	10820	9120	0.8	3	1	0	80	28	0.956868	114	0.0733802	540	51
18080.95	2780.95	15300	1.2	2	1	0	74	28	0.977191	100	0.0382265	559	52
4345	1820	2525	0	2	1	0	104	30	0.162572	108	0.0094204	192	159
5250.95	2780.95	2470	0	5	1	0	116	29	0.162572	93	0.0094204	273	95
11900	8090	3810	0.14	3	1	0	125	29	0.162572	95	0.0094204	391	115
1960	610	1350	0.03	3	1	0	66	29	0.162572	92	0.0094204	391	115
13605.95	2780.95	10825	0.85	2	1	0	71	29	0.977191	88	0.0382265	532	81
1850	1850	0	0.76	2	1	1	69	29	0.622454	107	0.025401	541	56
12740	6440	6300	0.8	3	0	0	98	4	0.730911	102	0.0663735	489	52
9500	5460	4040	0.8	2	0	0	107	4	0.730911	116	0.0663735	445	50
10350	5050	5300	0.75	3	0	0	123	4	0.730911	114	0.0663735	489	52
14884.27	6184.27	8700	0.8	2	0	0	120	4	0.730911	114	0.0663735	416	50
12984.27	6184.27	6800	0.7	4	0	0	57	8	0.609184	111	0.0483162	503	91
14039.27	6184.27	7855	0.68	3	0	0	58	8	0.609184	111	0.0483162	503	91
13684.27	6184.27	7500	0.5	2	0	0	59	8	0.550065	111	0.077722	317	50
5050	4450	600	0.75	1	0	0	57	8	0.609184	111	0.0483162	507	71
22884.27	6184.27	16700	0.5	3	0	0	131	4	0.550065	114	0.077722	416	50
27809.27	6184.27	21625	0.75	5	0	0	56	8	0.609184	111	0.0483162	507	71
22284.27	6184.27	16100	0.5	2	0	0	82	8	0.550065	111	0.077722	317	50
20013	6030	13983	0.85	2	0	0	96	4	0.730911	117	0.0663735	489	52
18659.27	6184.27	12475	0.5	2	0	0	59	8	0.550065	111	0.077722	416	50
9072	8322	750	0.7	4	1	1	167	69	0.0945635	138	0.0064607	137	98
1975	1975	0	1.25	2	1	1	107	60	0.113146	147	0.0092077	183	90
3903	1913	1990	2	2	1	1	122	2	0.220122	166	0.0136009	183	90
19568	9110	10458	0.63	2	0	0	146	73	0.938425	192	0.0731887	352	51
23141	18402	4739	0.48	4	0	0	187	73	0.525776	238	0.0404742	350	50
11175	8925	2250	0.3	2	1	1	93	78	0.111335	113	0.024527	202	73
3300	1150	2150	0	2	0	1	155	30	0.0837841	137	0.0070218	163	92
10429.5	6230	4199.5	0.24	3	1	1	80	10	0.0945635	123	0.0064607	137	98
2780.95	2780.95	0	0	3	1	1	262	123	0.114098	310	0.0353737	112	101
92655	69255	23400	0.5	2	0	1	279	113	0.938425	217	0.0731887	341	51
5690	4100	1590	0.2	2	1	1	150	65	1.18665	257	0.24948	132	40
11558	5828	5730	0.2	3	1	1	136	39	0.301232	152	0.125241	398	52
15500	6000	9500	0.2	2	1	1	103	37	0.301232	132	0.125241	398	52
950	0	950	0	4	1	1	133	40	0.301232	156	0.125241	335	53
30719	19300	11419	0.3	3	1	1	447	45	1.25102	414	0.316655	310	10
5875	4625	1250	0	4	0	1	212	73	0.460891	252	0.252328	290	46
22000	7500	14500	0	4	1	1	211	23	0.460891	170	0.252328	388	48
23405	8430	14975	0.6	4	1	1	223	58	0.484084	300	0.183163	174	39
5200	2625	2575	2	3	1	0	156	83	0.921857	149	0.172033	215	15
2210	375	1835	2	4	1	0	66	28	0.823209	150	0.110999	439	26
13820	8620	5200	0.25	3	1	1	183	83	0.746628	148	0.166524	411	45
10400	7400	3000	0	4	1	1	122	17	0.464075	174	0.037901	276	50
14900	5200	9700	1.5	2	1	1	244	30	1.96795	150	0.208997	210	23
15359	2611	12748	0.41	4	1	1	178	47	0.869447	119	0.0533131	210	23
27220	10220	17000	0.23	4	1	0	63	45	0.613041	136	0.0464445	217	41
10409	2611	7798	0.23	5	1	0	82	42	0.613041	157	0.0464445	208	39
25570	9970	15600	0.33	2	1	1	69	45	0.613041	147	0.0464445	217	41
23620	7700	15920	0.7	2	1	1	102	21	1.2862	147	0.299048	157	16
5340	1850	3490	0.01	4	1	1	97	15	0.497768	175	0.0415185	210	34
5050	2800	2250	0.05	4	1	1	135	15	0.54417	213	0.0684495	269	48
10326	6376	3950	0.15	6	1	1	67	42	0.613041	108	0.0464445	208	39
21990	10990	11000	0.43	2	1	0	231	39	1.12052	36	0.0395818	209	13
1132	1132	0	0	4	0	0	131	5	0.396108	221	0.0550344	265	50
36550	24050	12500	0.3	5	1	1	119	43	0.396108	166	0.0550344	265	50
17110	10660	6450	2.2	4	1	1	214	61	0.756518	29	0.20475	264	31
51500	34700	16800	0.9	4	1	1	279	63	1.9476399	376	0.495619	330	8
12950	9300	3650	0	5	1	0	205	293	0.507884	207	0.221576	213	76
13370	7770	5600	0	5	1	0	188	71	0.507884	248	0.221576	282	50
14980	7480	7500	0.5	4	1	0	132	13	0.578739	218	0.290762	202	54
11480	5480	6000	0.6	5	1	1	96	13	0.578739	176	0.290762	202	54
8215	8215	0	0.1	1	1	1	111	66	0.578739	386	0.290762	159	57
17150	13430	3720	0.8	2	1	1	192	19	0.836626	152	0.193317	419	48
14900	10400	4500	0	4	1	1	125	67	0.25528	240	0.111328	112	58
25235	16765	8470	0.6	4	1	0	81	93	0.582903	95	0.0556928	154	60
9800	8500	1300	0	5	1	1	241	86	0.181033	364	0.0851625	105	58
3400	3400	0	0.6	4	1	1	222	21	0.369105	152	0.11368	146	56
1070	570	500	0	6	1	1	157	9	0.181033	204	0.0851625	97	60
54470	45520	8950	1.5	2	0	1	157	93	0.879501	165	0.157825	172	47
12000	12000	0	0.1	1	1	1	285	67	0.25528	429	0.111328	123	57
28996	27596	1400	0	6	1	1	178	14	0.196971	424	0.0762684	115	61
22620	21170	1450	0.7	2	1	1	213	193	0.944006	221	0.126857	259	48
13960	9800	4160	0.35	4	1	1	84	35	0.921205	155	0.146966	305	32
280	280	0	0	4	1	1	136	92	1.65608	196	0.702248	285	10
9775	0	9775	0.3	2	0	1	128	53	0.463143	189	0.0611309	189	49
23768	21668	2100	0.25	1	1	1	95	58	0.387771	193	0.0431111	191	51
1480	0	1480	0	2	1	0	63	34	0.242625	106	0.0294189	270	53
2016	0	2016	0	0	1	0	65	34	0.242625	106	0.0294189	270	53
19000	11590	7410	0.18	2	1	1	157	33	0.487358	141	0.023282	182	53
24500	16500	8000	0.25	2	0	0	143	33	0.522319	155	0.0212355	185	50
23150	16850	6300	0.3	2	1	1	66	37	0.717339	107	0.0270709	185	50
9000	9000	0	0.2	1	1	0	138	31	0.717339	125	0.0270709	199	52
7290	6350	940	0.21	2	1	0	170	33	0.717339	151	0.0270709	199	52
0	0	0	0	3	0	1	187	2	1.40268	262	0.062534	237	594
0	0	0	0	4	1	0	150	3	1.40268	184	0.062534	237	594
1520	1520	0	0	2	0	1	112	2	1.03822	145	0.0587334	185	10
7920	3020	4900	0.62	2	0	0	317	111	1.59025	82	0.403252	448	18
11150	4200	6950	0	3	1	1	354	22	0.21808	179	0.0081094	373	28
68599	62884	5715	1.05	2	1	1	277	92	1.6789	311	0.0530144	205	19
2353.55	2203.55	150	0.6	0	1	1	137	24	1.14431	354	0.194585	589	122
2300	0	2300	0.34	1	1	0	463	92	0.21808	97	0.0081094	334	31
600	0	600	0	5	0	1	128	47	1.08495	181	0.0572883	150	12
4700	1250	3450	0.01	2	0	1	192	143	1.10176	197	0.0356891	165	12
47928	36865	11063	0.5	5	0	1	168	27	1.2314301	260	0.152258	177	14
12980	6550	6430	1.5	3	1	1	364	83	1.10174	195	0.219741	182	16
11495	7995	3500	0	4	1	0	181	208	0.714222	151	0.292816	152	37
11250	3050	8200	0.2	2	1	0	133	23	0.864529	198	0.24768	162	13
11496	9566	1930	0.05	3	1	1	214	78	1.12018	208	0.425451	150	11
7705	6105	1600	0	2	1	1	178	20	0.560754	167	0.028114	128	41
3990.31	3990.31	0	0.5	5	1	1	110	67	0.62102	216	0.0299928	306	90
10746	4296	6450	1	2	1	1	166	32	0.942656	148	0.0215249	103	72
5200	1656.75	5200	0.15	2	0	0	49	6	0.483369	127	0.0266126	256	285
3313.5	1656.75	6000	0.2	2	0	0	52	6	0.483369	73	0.0266126	256	285
6630	4005	2625	0	5	1	1	105	33	1.29054	134	0.0898608	168	33
2940	640	2300	2	4	1	1	210	18	0.852293	270	0.102825	144	50
11250	9250	2000	0.25	2	0	1	101	13	0.852293	171	0.102825	119	52
15560	4300	11260	0.25	0	0	1	139	29	0.437935	216	0.0908594	159	44
20000	20000	0	0.4	4	0	1	144	93	1.52351	131	0.214677	196	10
59375	25355	34020	1.05	3	1	1	182	73	1.7535	284	0.1857	213	10
32975	2000	30975	1	2	0	1	144	73	1.7535	255	0.1857	194	10
26255	16350	9905	1.25	3	1	0	104	93	1.75499	179	0.237405	189	38
18170	18170	0	0.9	2	1	0	296	93	1.54053	131	0.218979	197	10
53530	46910	6620	1.8	1	1	1	263	93	2.80794	178	0.645573	606	8
37897	22250	15647	1	4	0	0	249	9	1.74545	174	0.217191	195	11
39915	6575	33340	0.3	4	1	1	507	207	1.18832	342	0.0636754	169	39
26050	15025	11025	1	2	0	1	296	93	1.54053	163	0.218979	197	10
31172	21075	10097	1.5	5	0	0	103	93	2.5203199	114	0.552764	491	10
42600	34810	7790	1.3	5	1	0	87	18	2.39521	214	0.187506	229	10
12400	10400	2000	0.65	2	1	1	155	93	1.54053	212	0.218979	197	10
49749	33325	16424	2.25	2	1	1	204	93	1.75499	246	0.237405	232	11
44199	25100	19099	0.5	4	1	1	544	46	0.807654	410	0.112866	144	47
28360	23360	5000	1.2	2	0	1	106	35	1.74545	157	0.217191	207	11
31030	11130	19900	0.6	2	1	0	101	29	0.972853	143	0.30412	226	35
39448	24850	14598	1.2	1	1	0	272	93	1.54053	337	0.218979	197	10
21545	5695	15850	0.05	2	1	1	296	156	0.699668	418	0.0345811	167	38
32540	18850	13690	0.5	2	0	1	76	31	1.36915	112	0.185461	188	10
17685	14305	3380	0.55	2	0	1	111	23	1.42812	141	0.168724	188	10
31608	22450	9158	1.2	3	1	1	97	38	1.6795501	142	0.249194	266	11
33670	17190	16480	1	3	1	1	75	30	1.51487	140	0.256558	306	11
29180	16050	13130	1.05	2	1	1	168	88	1.51487	128	0.256558	290	12
20690	8945	11745	1.2	3	1	1	189	93	1.54381	185	0.268119	319	12
32488	20758	11730	1.3	2	1	1	211	93	1.6795501	308	0.249194	256	16
22155	10530	11625	1	2	1	1	216	47	1.50569	237	0.228236	306	11
23205	14025	9180	0.5	2	0	1	285	64	1.36915	234	0.185461	230	10
23680	21030	2650	1.75	4	0	1	177	26	1.75332	167	0.234288	272	12
23749	9233	14516	0.76	3	1	1	123	33	1.44616	183	0.227069	312	10
25790	3750	22040	1.1	4	1	1	80	28	1.54381	117	0.268119	319	12
45869	33720	12149	1	2	1	1	78	28	1.44616	81	0.227069	338	10
6055	3955	2100	0.65	2	1	1	326	93	1.5865999	129	0.292797	295	10
27050	18150	8900	0.45	4	1	1	152	16	1.2058901	177	0.0972235	195	12
16065	14565	1500	0.38	4	1	1	143	25	1.08749	259	0.0239777	277	17
47285	12850	34435	0.9	2	1	1	208	53	1.65437	127	0.100294	293	10
32832	17032	15800	0.23	4	1	1	419	40	1.04623	112	0.145237	289	25
20300	15260	5040	0.6	3	1	1	262	93	1.58333	103	0.0601768	262	10
3313.5	1656.75	2175	0.4	3	1	1	125	25	1.12806	126	0.0745396	229	32
24318.2	17538.2	6780	1.65	3	1	1	432	93	2.23049	358	0.281665	411	10
7200	6800	400	0	5	1	1	89	16	0.60032	164	0.0768965	91	60
17230	14400	2830	0.1	4	0	1	161	2	0.775424	154	0.164229	109	50
4950	4500	450	1	4	1	1	440	60	0.957388	302	0.113628	213	47
21185	8615	12570	0.25	2	1	1	540	364	1.63438	223	0.250248	142	10
49205	42185	7020	0.5	5	1	1	187	9	0.633161	275	0.0525533	181	58
1000	0	1000	0	4	1	1	114	33	0.733593	216	0.195767	292	73
0	0	0	0.1	0	0	1	157	25	1.24503	181	0.0836553	590	25
34700	16060	18640	1.1	3	1	1	637	93	1.33233	157	0.352499	160	14
24760	18010	6750	0.35	5	0	1	367	8	1.3278199	186	0.347185	131	32
800	800	0	0	3	0	1	116	3	1.15922	197	0.0778226	113	47
69604	20824	48780	1.2	5	1	1	146	24	1.47044	164	0.171615	143	16
15590	4540	11050	0.25	2	0	1	76	21	1.29655	96	0.15679	137	17
12910	4300	8610	0.3	3	1	1	352	513	1.44331	328	0.274952	132	14
17475	13675	3800	0.6	3	0	1	106	83	0.928176	278	0.0136466	339	46
28635	18400	10235	1	2	0	0	152	83	0.928176	311	0.0136466	321	65
20561.04	4316.04	16245	0.5	2	0	0	159	65	0.991219	200	0.0296414	110	53
15130	7060	8070	0.5	2	1	0	159	65	0.991219	200	0	110	53
19267	15037	4230	0.6	3	1	0	101	67	2.4387	154	0.596659	133	14
19890.04	4316.04	15574	0.72	2	1	1	71	93	0.936202	130	0.0140403	107	47
7016.04	4316.04	2700	0.7	2	1	0	155	93	0.656172	130	0.0132594	107	47
11016.04	4316.04	6700	0.8	2	1	1	172	63	1.2736599	230	0.028777	134	15
15220.04	4316.04	10904	0.72	1	1	0	78	93	0.936202	140	0.0140403	108	47
18466.04	4316.04	14150	0.9	2	1	0	171	242	2.4387	329	0.596659	137	11
48540	29150	19390	1	2	1	0	193	242	2.4387	283	0.596659	137	11
23226.04	4316.04	18910	1	2	1	0	90	93	0.891232	159	0.012239	105	56
11642.04	4316.04	7326	0.75	2	1	0	78	73	0.891232	160	0.012239	109	52
9552.04	4316.04	5236	0.77	4	1	0	79	93	0.891232	161	0.012239	109	52
9251.04	4316.04	4935	0.75	1	1	0	110	73	0.891232	176	0.012239	109	52
17678.04	4316.04	13362	0.71	4	1	0	155	93	0.656172	152	0.0132594	107	47
17541.04	4316.04	13225	0.7	3	1	0	61	93	0.656172	150	0.0132594	107	47
18816.04	4316.04	14500	0.85	2	1	0	90	93	0.891232	163	0.012239	105	56
8366.04	4316.04	4050	0.6	3	1	0	80	93	0.656172	178	0.0132594	107	47
19495.04	4316.04	15179	0.78	3	1	0	79	93	0.891232	148	0.012239	109	52
8700	5000	3700	0	1	1	0	114	73	0.457295	172	0.309205	174	52
4316.04	4316.04	0	1.75	1	0	0	767	4	3.00036	62	0.59318	404	51
6266.04	4316.04	1950	1.65	2	0	0	44	143	3.2916901	82	0.942206	167	34
6856.04	4316.04	2540	1.65	1	0	0	138	143	3.2916901	163	0.942206	167	34
6751.04	4316.04	2435	0	2	0	0	814	1	1.05556	50	0.0931124	257	36
6051.04	4316.04	1735	1.75	2	0	0	372	1	3.40885	64	0.309801	171	24
4816.04	4316.04	500	1.75	2	0	0	372	1	3.40885	70	0.309801	171	24
8419.04	4316.04	4103	1.75	1	1	0	55	168	3.3602901	75	0.0932634	151	22
8316.04	4316.04	4000	1.75	1	0	0	41	98	3.3602901	101	0.0932634	151	22
8716.04	4316.04	4400	1.65	2	0	0	51	0	3.1747899	98	0.151852	155	20
7916.04	4316.04	3600	0.6	1	0	0	372	1	1.05556	56	0.0931124	257	36
7826.04	4316.04	3510	1.75	1	1	0	99	143	3.3602901	219	0.0932634	151	22
15816.04	4316.04	11500	1.75	2	1	0	67	98	3.3602901	128	0.0932634	151	22
7316.04	4316.04	3000	1.75	2	0	0	52	143	3.3602901	106	0.0932634	151	22
9616.04	4316.04	5300	1.75	2	1	0	44	98	3.3602901	108	0.0932634	151	22
10316.04	4316.04	6000	0.75	2	0	0	814	1	1.05556	50	0.0931124	257	36
11284	6100	5184	0.75	1	1	0	814	1	1.05556	50	0.0931124	221	44
8961.04	4316.04	4645	0.4	1	0	0	814	1	1.05556	50	0.0931124	257	36
7430.04	4316.04	3114	1.5	1	1	0	372	1	2.9772501	64	0.367783	257	36
24221.04	4316.04	19905	0	2	1	0	372	1	1.05556	50	0.0931124	257	36
6966.04	4316.04	2650	0.65	2	0	0	372	1	1.05556	62	0.0931124	257	36
8420.04	4316.04	4104	2.3	2	1	0	50	0	3.40885	103	0.309801	171	24
10200	2700	7500	0.96	1	0	0	69	40	1.79276	107	0.0960307	155	20
10396.04	4316.04	6080	0	2	0	0	372	1	1.05556	44	0.0931124	257	36
9566.04	4316.04	5250	0.9	2	1	0	72	98	1.79276	120	0.0960307	155	20
9780	7860	1920	0.71	3	0	0	372	1	1.05556	62	0.0931124	257	36
15796.04	4316.04	11480	0.8	1	0	0	60	0	1.79276	112	0.0960307	155	20
50705	20940	29765	0.75	3	0	0	372	1	1.05556	64	0.0931124	257	36
8882.1	7682.1	1200	1.4	2	0	0	814	1	0.962753	48	0.109649	227	48
9982.1	7682.1	2300	0.3	2	1	0	814	1	0.962753	48	0.109649	227	48
9182.1	7682.1	1500	2.3	1	1	0	814	1	1.05556	48	0.0931124	257	36
9682.1	7682.1	2000	2.3	2	1	0	818	0	0.962753	93	0.109649	221	48
10182.1	7682.1	2500	3	2	0	0	814	1	1.05556	48	0.0931124	257	36
8932.1	7682.1	1250	2.3	2	1	0	814	1	0.962753	48	0.109649	249	40
9682.1	7682.1	2000	2.25	1	1	0	814	1	0.962753	48	0.109649	249	40
10242.1	7682.1	2560	1.65	1	1	0	814	1	0.962753	52	0.109649	249	40
17132.1	7682.1	9450	0.4	1	0	0	818	0	0.962753	74	0.109649	278	44
10990.1	7682.1	3308	2	1	1	0	814	1	0.962753	48	0.109649	249	40
12182.1	7682.1	4500	0.15	1	0	0	818	0	0.636722	93	0.0638741	236	49
12682.1	7682.1	5000	0.15	1	0	0	818	0	0.636722	93	0.0638741	236	49
12542.1	7682.1	4860	0.3	2	1	0	818	0	0.636722	74	0.0638741	236	49
14012.1	7682.1	6330	0.25	1	1	0	818	0	0.636722	74	0.0638741	236	49
12982.1	7682.1	5300	0	1	0	0	818	0	0.636722	74	0.0638741	236	49
17682.1	7682.1	10000	0.15	1	0	0	818	0	0.636722	93	0.0638741	236	49
15682.1	7682.1	8000	0.15	1	0	0	818	0	0.636722	74	0.0638741	236	49
0	0	0	0.02	3	1	0	161	143	3.2916901	482	0.942206	187	47
4700	4600	100	0.9	2	0	0	93	143	3.2916901	59	0.942206	268	50
8900	2700	6200	0.65	1	0	0	93	143	3.2916901	86	0.942206	268	50
11950	8400	3550	0.75	1	0	0	68	98	1.49108	129	0.100379	257	14
14750	8100	6650	0.8	2	1	0	73	98	1.49108	194	0.100379	257	14
7350	3000	4350	0.75	2	1	0	59	98	1.49108	101	0.100379	257	14
15600	11800	3800	0.8	3	1	0	56	98	1.49108	125	0.100379	257	14
39551	25471	14080	1.25	3	0	0	59	98	2.2226	91	0.124412	313	18
47685	35945	11740	0.85	5	0	0	55	72	1.70108	97	0.232532	180	11
28426.04	4316.04	24110	1.38	1	0	0	124	98	2.2226	129	0.124412	313	18
90795	40695	50100	0.9	2	0	0	57	72	1.70108	337	0.232532	180	11
60916	42436	18480	1.2	2	0	0	126	72	1.70108	212	0.232532	200	15
27133	10475	16658	1.17	3	1	0	88	72	1.70108	100	0.232532	180	11
37344	8350	28994	1.45	1	1	0	53	89	2.2425101	167	0.27397	350	18
750	750	0	0	2	1	0	196	168	3.2916901	648	0.942206	187	47
4316.04	4316.04	0	0	1	0	0	73	113	3.2916901	102	0.942206	167	34
63715	22015	41700	0.65	3	0	0	73	113	3.2916901	133	0.942206	167	34
14580	10645	3935	0.9	2	0	1	49	38	2.2425101	114	0.27397	334	21
10250	5980	4270	0.5	4	0	0	82	63	1.33302	130	0.268209	339	17
10995	5100	5895	0.5	2	1	0	72	98	0.976106	150	0.111912	301	47
25914	13364	12550	0.65	2	1	0	114	43	1.33302	239	0.268209	339	17
35520	16970	18550	0.7	3	1	0	153	193	1.70108	349	0.232532	200	15
45215.5	32690.5	12525	1.15	2	1	1	49	38	2.2425101	114	0.27397	334	21
1000	1000	0	0.05	0	1	0	952	98	0.83978	135	0.0946983	255	45
7220	3725	3495	0.3	3	1	0	952	98	1.12242	117	0.0379546	323	19
13446	11246	2200	0.3	1	0	0	952	98	1.12242	118	0.0379546	299	18
10350	5400	4950	0.4	2	0	0	952	98	1.12242	109	0.0379546	323	19
21000	18430	2570	0.3	5	0	0	952	98	1.12242	119	0.0379546	299	18
20645	7992	12653	0.15	1	0	0	952	98	0.976106	95	0.111912	301	47
12786.04	4316.04	8470	0.25	1	0	0	952	98	1.12242	109	0.0379546	323	19
10321.04	4316.04	6005	0.5	2	0	0	952	98	1.12242	122	0.0379546	260	37
10291.04	4316.04	5975	0.18	2	1	0	818	0	0.507979	88	0.0894889	247	52
9066.04	4316.04	4750	0.22	1	1	0	91	0	0.604655	80	0.151837	247	54
25505.04	4316.04	21189	0.25	2	1	0	86	0	0.604655	80	0.151837	247	54
3680	3680	0	0.15	2	1	1	124	35	0.644727	291	0.100694	351	51
1655	185	1470	0.5	1	1	1	282	27	1.00205	356	0.0275446	134	50
42733	7585	35148	0	2	1	1	156	38	0.644727	264	0.100694	329	52
2105	480	1625	0	2	1	1	65	38	0.377233	157	0.108486	341	76
4896.04	4316.04	580	0	2	0	1	96	38	0.377233	190	0.108486	357	96
17100	6750	10350	0.7	3	1	0	133	36	0.394753	260	0.0907153	313	143
19300	3950	15350	1.65	2	1	1	100	38	0.504725	177	0.075071	342	53
19315	12250	7065	2	5	1	1	64	38	0.504725	153	0.075071	342	53
11029	5619	5410	1.6	2	1	0	204	33	0.452244	293	0.145924	370	124
3475	3405	70	0.6	2	1	0	64	38	0.432217	153	0.106131	284	59
4325	4325	0	0.5	2	1	1	113	38	0.432217	138	0.106131	284	59
6667	5767	900	0.25	2	1	0	63	38	0.427223	153	0.17612	285	86
4316.04	4316.04	0	0	6	1	1	128	35	0.504532	301	0.0309666	119	52
21816	9266	12550	1.7	2	1	1	159	38	1.13451	272	0.16576	99	54
10766	7272	3494	1.4	2	1	1	269	38	0.614489	389	0.0575241	126	50
8400	3100	5300	0	2	1	1	108	40	0.504532	166	0.0309666	139	52
2085	1835	250	0.7	2	1	1	218	38	0.0870628	356	0.0151501	42	84
8780	6238	2542	0.35	4	1	1	184	33	0.0347476	315	0.040697	356	123
20940	6665	14275	0	4	1	1	203	37	0.244745	362	0.0489029	366	61
32080	13680	18400	0	2	1	1	132	38	0.23973	230	0.0399751	306	64
4716.44	4316.04	400.4	1.5	1	1	1	202	37	0.34973	260	0.0433641	263	64
1700	0	1700	0.6	2	1	1	104	36	0.184553	211	0.0199849	200	54
5516.04	4316.04	1200	1	1	0	0	149	5	0.708631	147	0.0494918	107	39
13757.04	4316.04	9441	0.4	5	0	1	1009	20	0.894952	179	0.0751426	112	48
20955.66	10026.66	10929	0.69	1	0	1	87	63	1.21744	119	0.207057	225	10
11000	7950	3050	0.85	3	1	0	95	82	1.37157	250	0.306507	240	10
15364	9764	5600	0.7	4	1	1	79	63	1.21744	183	0.207057	225	10
436528	221788	214740	1.68	4	1	1	262	198	1.9461499	250	0.304038	267	10
57280	17430	39850	0.35	2	1	1	232	60	0.928623	311	0.0431721	226	41
26600.66	10026.66	16574	1.13	2	1	1	384	83	1.70937	649	0.372676	251	9
4316.04	4316.04	0	1.1	0	1	1	76	59	1.78161	158	0.357264	279	9
4316.04	4316.04	0	1.1	1	1	1	214	69	1.58944	676	0.258712	201	10
4316.04	4316.04	0	1.1	2	0	1	151	198	1.56303	306	0.178862	177	10
8216.04	4316.04	3900	1.1	2	0	1	394	193	1.49516	300	0.25632	221	10
14200	10000	4200	1.1	3	1	1	849	293	1.4564199	387	0.175416	197	10
49704	28870	20834	1.15	2	0	1	128	115	1.87763	277	0.188812	186	10
131390	33050	98340	1	4	1	1	79	37	0.622124	165	0.032027	419	447
75765	51715	24050	0.75	3	0	1	57	37	0.622124	195	0.032027	419	447
5425	2400	3025	0	2	1	1	248	43	1.07098	81	0.461298	251	18
7666.04	4316.04	3350	1	0	1	1	147	13	1.7515	327	0.146305	335	12
26186.04	4316.04	21870	0.6	4	1	1	86	73	1.6	193	0.567095	291	10
82343.04	4316.04	78027	0.2	2	1	1	164	38	1.14432	198	0.410517	285	14
7300	600	6700	0.1	2	1	1	170	118	0.78366	266	0.0106354	282	205
15688	9790	5898	0.48	5	1	1	74	32	1.07112	159	0.0226615	256	19
23568	8005	15563	0.59	2	1	0	99	40	1.07625	149	0.0377195	114	42
14916	8005	6911	0.75	2	1	0	100	27	1.14612	216	0.0555642	154	15
20169	7522	12647	0.6	4	1	0	63	38	1.07625	131	0.0377195	125	22
10902	7475	3427	0.68	0	1	0	74	38	1.13871	149	0.0289476	133	17
23600	11500	12100	0.85	1	1	0	73	32	1.27618	129	0.0566806	252	15
38935	17410	21525	0.91	2	1	0	111	32	1.27618	157	0.0566806	252	15
28112.96	10285.96	17827	0.72	1	1	0	66	38	1.13871	109	0.0289476	133	17
32823	14534	18289	0.8	2	1	0	54	32	1.27618	115	0.0566806	252	15
35007	13280	21727	0.59	2	1	0	103	40	1.07625	120	0.0377195	125	22
31480	11750	19730	0.79	1	1	0	84	38	1.16117	122	0.0308182	145	15
26825	14960	11865	0.8	1	1	0	67	38	1.2461801	131	0.0556391	204	14
79720	19720	60000	0.8	4	1	0	67	38	1.16117	130	0.0308182	145	15
14000	0	14000	0.6	1	1	0	46	32	1.1486599	111	0.024708	279	10
11411	7089	4322	0.56	5	1	0	65	32	1.07112	123	0.0226615	365	17
23201	11925	11276	0.72	2	1	0	109	33	1.21861	136	0.0689283	322	12
10225	5050	5175	0.68	1	1	0	109	33	1.21861	126	0.0689283	415	14
19604	10250	9354	0.85	2	1	0	70	33	1.38114	124	0.130305	415	14
14280	6780	7500	0.75	1	1	0	45	33	1.31862	111	0.18691	334	11
23155	12440	10715	0.59	2	1	0	57	32	1.11859	123	0.0111874	327	12
24910	13160	11750	0.75	2	1	0	47	33	1.31862	118	0.18691	334	11
16209	9300	6909	0.72	2	1	0	50	33	1.21861	119	0.0689283	327	12
17810	7411	10399	0.59	1	1	0	69	33	1.11859	159	0.0111874	327	12
22437	9425	13012	0.59	2	1	0	68	33	1.11859	121	0.0111874	327	12
29100	23800	5300	0.75	2	1	0	49	33	1.31862	118	0.18691	334	11
21005	15605	5400	0.65	4	0	0	101	32	1.01624	179	0.0455007	135	42
28220	10510	17710	0.68	2	1	0	52	32	1.1861399	117	0.0420407	173	12
27185	11830	15355	0.62	3	0	0	66	32	1.0013	123	0.0473387	119	50
55254	16235	39019	0.78	2	1	0	88	32	1.19868	133	0.036958	168	12
38910	16360	22550	0.63	2	1	0	82	32	1.01624	133	0.0455007	135	42
31700	12100	19600	0.68	4	1	0	93	33	1.0662301	183	0.0355608	151	35
35235	25885	9350	0.78	2	1	0	53	32	1.19868	126	0.036958	168	12
38070	18950	19120	0.63	2	1	0	63	32	1.0013	128	0.0473387	119	50
52030	12040	39990	0.7	1	0	1	124	32	1.1861399	156	0.0420407	173	12
91608	43203	48405	0.78	2	1	0	59	32	1.1861399	154	0.0420407	173	12
29990	18040	11950	0.68	5	1	0	66	32	1.0662301	128	0.0355608	151	35
15445	0	15445	0.7	2	1	0	80	32	1.05626	134	0.0264726	214	44
18165	11865	6300	0.7	4	1	0	55	32	1.0013	108	0.0473387	125	51
17960	12360	5600	0.68	3	1	0	66	32	0.983805	136	0.0260402	125	51
10118	6988	3130	2.7	2	1	0	65	32	1.41368	122	0.0610591	274	18
40310	23310	17000	0.68	4	1	0	84	32	0.983805	117	0.0260402	144	50
32330	18680	13650	0.68	2	1	0	74	32	0.983805	138	0.0260402	144	50
32800	26100	6700	2.7	4	1	0	74	32	1.41368	121	0.0610591	274	18
27285	14325	12960	0.78	2	1	0	75	32	1.05626	131	0.0264726	214	44
29030	17400	11630	0.73	3	1	0	66	32	1.05626	168	0.0264726	214	44
32925	14400	18525	0.68	2	1	0	88	32	0.936322	136	0.0247874	144	50
37768	12428	25340	0.7	3	1	0	70	32	1.0013	125	0.0473387	125	51
33756	24036	9720	0.68	2	1	0	86	32	0.936322	121	0.0247874	171	48
30050	20500	9550	0.68	5	1	0	86	32	0.936322	126	0.0247874	171	48
6860	2160	4700	0.5	1	0	0	142	28	0.959081	210	0.0983286	144	50
17865	13850	4015	0.6	5	1	0	70	43	0.971393	130	0.0611403	127	49
24527	9357	15170	2.55	2	1	0	202	37	1.28413	239	0.0866893	153	50
7050	5250	1800	1.8	2	1	1	145	32	1.15892	195	0.21307	163	12
15660	10210	5450	0.7	2	1	1	197	28	1.0565799	160	0.04687	140	52
13134	5499	7635	0.5	2	1	0	104	28	0.951361	177	0.0520735	117	50
16440	11530	4910	0.6	4	1	1	75	43	0.971393	150	0.0611403	127	49
10730	3380	7350	0.43	2	0	0	61	28	0.951361	149	0.0520735	117	50
18255	0	18255	1	1	0	1	165	78	1.1389	212	0.100206	144	31
46746	13457	33289	0.4	5	1	1	160	73	0.933832	239	0.0450181	120	48
55384	17120	38264	0.65	2	1	1	197	60	1.04135	235	0.103022	152	30
33119	14707	18412	0.7	2	1	0	100	28	1.0565799	141	0.04687	161	50
31836	17250	14586	2.3	1	1	1	116	24	1.15892	142	0.21307	163	12
33485	12177	21308	0.65	4	1	1	156	31	1.03136	198	0.102453	138	33
36455	7715	28740	0.4	2	0	1	178	66	0.891284	641	0.0468438	124	45
5495	1525	3970	0.5	1	1	0	90	33	0.946448	148	0.111374	133	49
10730	0	10730	0.62	2	1	0	90	42	0.951361	123	0.0520735	117	50
22350	17900	4450	2.4	1	1	1	63	28	0.976358	156	0.0518481	135	49
7295	7045	250	0.57	2	1	0	104	43	0.951252	158	0.034865	128	43
11140	5440	5700	0.7	1	1	0	69	43	0.971393	122	0.0611403	127	49
14048	6550	7498	0.5	3	1	0	68	28	0.933908	145	0.0536776	135	51
14325	10900	3425	0.4	4	1	1	52	28	0.933908	121	0.0536776	119	51
28807	5705	23102	0.6	2	1	0	126	43	0.951252	181	0.034865	115	47
29276	27570	1706	0.45	3	1	1	80	28	0.933908	135	0.0536776	124	56
29450	18200	11250	1.15	4	1	1	119	58	1.66188	221	0.0569442	198	36
2800	0	2800	0.3	2	1	0	57	45	0.211807	161	0.0075715	162	124
24445	12900	11545	0.5	1	1	0	82	47	0.211807	192	0.0075715	162	124
24448	0	24448	0.63	0	1	0	92	43	0.694334	164	0.0220014	219	79
31565	12265	19300	0.68	2	1	0	116	13	1.26185	156	0.0635499	193	21
3606.5	1481.5	2125	0.5	2	1	1	233	63	0.597022	366	0.0565305	121	43
2950	2950	0	0.25	3	0	1	137	16	0.538259	155	0.0933367	108	48
5000	4620	380	0.2	2	1	0	137	16	0.538259	155	0	108	48
2860	2860	0	1.9	2	1	1	106	31	0.990111	161	0.086643	147	41
34419	27262	7157	0.6	2	0	1	83	16	0.703176	177	0.070299	106	49
6500	4200	2300	0.28	4	1	1	256	99	0.879992	301	0.0608416	162	26
2480	880	1600	0.4	4	0	1	167	23	0.958943	247	0.0594169	190	27
15575	8725	6850	0.75	1	1	1	101	13	1.5223401	225	0.177742	366	33
18315	7415	10900	0.7	5	1	1	129	118	1.48343	193	0.0552573	270	13
15150	8600	6550	0.75	3	0	1	108	73	1.5223401	148	0.177742	366	33
18610	11980	6630	0.19	1	1	1	93	68	0.781277	180	0.0437536	238	36
18000	11500	6500	0.35	2	0	1	100	19	0.90891	153	0.0594294	305	35
25167.12	15802.12	9365	0.45	4	0	1	118	73	0.990705	162	0.0958183	251	39
23102.12	15802.12	7300	0.48	1	0	0	233	213	1.11905	457	0.0570264	209	18
14000	2750	11250	0.48	3	0	1	122	73	0.990705	156	0.0958183	251	39
11550	5450	6100	0.6	1	1	1	260	159	1.2143	271	0.0690447	351	15
19815	18015	1800	0.4	4	0	0	73	31	0.90891	325	0.0594294	305	35
13093	4683	8410	0.6	2	0	1	174	89	1.2143	212	0.0690447	488	14
22640	18740	3900	0.52	2	0	1	148	83	1.11905	271	0.0570264	209	18
21902.12	15802.12	6100	0.06	1	1	1	93	68	0.781277	180	0	238	36
42790	33065	9725	0.68	1	0	1	236	103	1.4457901	563	0.137207	211	22
28755	12405	16350	0.7	2	1	0	163	109	1.44706	915	0.0838942	160	37
49361	35361	14000	0.3	2	1	1	212	109	0.879992	426	0.0608416	160	37
39831	27866	11965	0.45	5	1	1	98	22	0.990705	128	0.0958183	251	39
34229	5550	28679	1.1	3	0	1	170	118	1.59627	292	0.0599559	233	14
27095	11011	16084	0.64	2	0	1	179	118	1.3125401	300	0.135714	311	16
6069.5	2264.5	3805	0.5	3	1	1	283	204	0.929452	345	0.036162	115	48
17282.5	8982.5	8300	0.5	4	1	1	76	26	0.888969	192	0.0692829	118	44
17895	9945	7950	0.55	4	1	1	353	133	1.26455	116	0.117059	157	28
22502.12	15802.12	6700	0.3	1	0	0	205	118	0.879992	296	0.0608416	157	28
8950	6450	2500	0.65	2	1	1	184	193	1.5095299	287	0.266762	115	48
24377.12	15802.12	8575	0.3	2	1	0	58	28	0.839445	134	0.0426381	115	46
24720	8770	15950	0.5	1	1	1	251	230	0.888969	499	0.0692829	118	44
28115	12990	15125	0.5	2	0	1	249	46	0.884765	476	0.0630833	213	40
35002.12	15802.12	19200	0.3	1	0	0	353	133	0.813007	100	0.049862	137	43
33175	30750	2425	0.3	3	0	0	353	133	0.723915	71	0.0538984	137	43
41945	21725	20220	1	4	0	1	175	118	1.52722	262	0.34066	122	44
66590.12	15802.12	50788	1.3	5	0	1	83	73	2.0840099	96	0.262605	213	12
29205	26165	3040	0.6	4	0	1	106	43	1.26455	312	0.117059	157	28
34715	23565	11150	0.61	3	0	0	353	133	1.26455	94	0.117059	137	43
2861	1146	1715	0.15	4	0	1	139	40	0.441898	384	0	141	48
14560	11570	2990	0.2	2	1	1	330	113	0.612272	547	0.0437394	139	44
41860	29360	12500	0.18	4	0	1	139	40	0.441898	384	0.0265298	141	48
12252	12252	0	0.43	2	1	1	156	98	0.839445	242	0.0426381	114	49
29360	26560	2800	0.5	4	0	1	214	98	0.839445	340	0.0426381	115	46
37960	21500	16460	0.7	2	1	1	198	143	0.973561	384	0.280583	166	44
3500	3000	500	0.14	4	0	0	93	33	0.833487	197	0.106586	127	49
18169	7754	10415	0.58	2	1	1	148	90	1.26676	220	0.0982189	154	46
7601	6651	950	0.12	4	1	1	143	113	0.819612	277	0.0927772	159	47
14705	13055	1650	1.03	4	0	1	200	118	1.34408	354	0.107762	190	40
9140	5540	3600	0.68	2	0	1	124	139	1.34408	142	0.107762	190	40
18365	14000	4365	0.5	3	1	1	129	118	0.973561	183	0.280583	150	47
20495	17120	3375	0.35	6	0	1	107	18	0.833487	200	0.106586	127	49
26612	11950	14662	0.95	3	0	1	191	123	1.34408	331	0.107762	187	43
25705	10535	15170	0.5	2	0	0	129	118	0.973561	234	0.280583	187	43
31400	14100	17300	0.4	4	0	1	106	73	0.886538	201	0.144386	150	47
13150	6450	6700	0.3	5	1	1	271	12	0.778508	475	0.025306	270	43
16029.6	6164.8	9864.8	0.61	2	1	1	226	118	1.06442	358	0.041557	204	41
24251	7949	16302	0.8	2	0	0	242	118	1.20482	262	0.06861	366	45
16961	8435	8526	0.43	2	1	1	105	25	0.843314	135	0.107159	176	47
12765	10665	2100	0.45	5	1	1	297	113	0.934916	798	0.248557	220	48
16920	9820	7100	0.4	1	1	1	174	83	0.778508	127	0.025306	215	47
23902	14232	9670	0.5	2	1	1	115	15	1.0008301	258	0.0382118	259	41
15200	7500	7700	0.5	3	1	1	130	83	1.0008301	223	0.0382118	259	41
22800	10400	12400	0.88	3	0	0	198	31	1.39492	254	0.0817055	362	45
10342	4492	5850	1	4	0	1	133	64	1.5556901	244	0.0575363	330	36
19076	13416	5660	0.45	5	1	1	185	118	0.912534	346	0.0521648	283	35
74345	38450	35895	0.85	2	1	1	77	40	1.3848701	198	0.225898	229	43
54480	42460	12020	0.8	4	0	1	164	293	1.17182	274	0.159529	192	15
93900	38680	55220	0.8	4	0	1	90	35	1.11861	135	0.127581	264	42
29380	11710	17670	1.6	1	1	1	104	118	1.7792701	174	0.131632	204	10
55590	33990	21600	2	4	1	1	99	8	1.84039	234	0.0951063	243	33
51700	24950	26750	1.1	4	1	1	112	24	1.6167901	176	0.661959	207	10
35300	14100	21200	0.5	1	1	1	106	58	0.934916	162	0.248557	220	48
58000	28350	29650	0.8	4	1	1	230	19	1.08929	329	0.121444	312	41
47712	47712	0	0.85	6	1	1	269	118	1.31925	486	0.0319387	199	11
4825	0	4825	0.6	2	1	1	132	14	1.28938	275	0.14455	203	16
0	3	0	0.7	0	1	1	140	20	1.37436	523	0.0701795	204	29
23165	0	23165	0.74	1	1	0	79	38	1.51187	170	0.209375	201	11
12260	3250	9010	0.58	3	1	1	122	46	0.244377	194	0.419851	179	93
19055	14955	4100	0.6	2	1	1	226	43	1.17688	135	0.0778441	177	10
78300	69000	9300	0.6	4	1	1	97	63	0.839393	111	0.048804	195	56
64006	31756	32250	0.6	5	1	1	111	63	0.839393	226	0.048804	195	56
33725	24350	9375	0.6	2	1	1	127	118	0.749415	354	0.114938	179	93
57150	37000	20150	0.7	4	1	1	71	39	0.244377	120	0.419851	163	64
23041	18022	5019	0.58	2	0	1	138	9	0.859223	203	0.0705214	124	49
21887	11987	9900	0.8	5	0	1	108	14	1.0617599	169	0.10225	221	45
21293	17793	3500	0.65	3	0	1	102	4	0.959183	169	0.120083	142	50
23942	18242	5700	0.65	4	0	1	95	4	0.899135	168	0.0968896	152	49
18510	18510	0	0.8	4	0	1	95	4	1.03914	168	0.0818265	158	50
24170	16925	7245	0	0	0	1	105	8	0.771753	180	0.0433163	130	49
18786	14906	3880	0.7	2	0	1	99	14	0.976767	167	0.134914	194	48
94550	74000	20550	0.8	3	0	1	110	5	1.0114599	155	0.0455997	132	38
34922	17072	17850	0.55	3	0	1	81	11	0.804211	188	0.0533499	150	48
77775	58750	19025	0.6	3	1	1	94	9	0.871713	157	0.033091	137	49
30188	25427	4761	0.65	5	0	1	94	4	0.889108	168	0.0402151	156	48
35537	29619	5918	0.7	6	0	1	97	14	0.976767	164	0.134914	195	25
30616	20442	10174	0.8	4	0	1	92	13	0.99925	146	0.116981	187	46
53700	25700	28000	0.7	3	0	1	94	4	0.969013	172	0.0689175	141	43
26192	13442	12750	0.7	3	0	1	109	4	0.966597	164	0.0450594	181	46
42665	34865	7800	1	2	0	1	99	14	1.35682	165	0.0575833	187	15
83000	65500	17500	0.8	4	0	1	95	4	0.989152	174	0.050626	163	50
38720	18720	20000	0.68	2	0	0	94	4	0.966597	174	0.0450594	181	46
26187	16232	9955	0.6	3	0	1	139	8	0.859223	158	0.0705214	124	49
17748	11428	6320	0.69	2	0	0	60	14	0.876732	142	0.0451704	160	49
14710	8010	6700	0.65	2	0	0	59	14	0.849198	158	0.0382676	155	50
21782	15062	6720	0.8	4	0	0	54	13	0.979289	136	0.0582299	182	45
21649	11000	10649	0.8	4	0	0	77	13	0.979289	136	0.0582299	182	45
19543	11835	7708	0.63	4	0	0	59	9	0.849198	151	0.0382676	155	50
24310	17800	6510	0.8	5	0	0	76	13	0.979289	136	0.0582299	182	45
22895	20190	2705	0.8	2	0	0	185	14	0.976748	148	0.0770826	213	45
25441	9875	15566	0.8	5	0	0	67	14	0.976748	141	0.0770826	213	45
28144	15204	12940	0.8	4	0	0	185	14	0.976748	141	0.0770826	213	45
35780	24005	11775	0.6	2	0	0	60	9	0.826713	142	0.0798772	138	50
26522	12292	14230	0.7	4	0	0	58	9	0.899229	142	0.0833966	138	50
28568	10668	17900	0.87	2	0	0	91	13	1.10682	171	0.0277055	181	35
37440	17440	20000	0.65	3	0	0	60	9	0.849198	149	0.0382676	155	50
22590.12	15802.12	6788	0.7	2	0	0	64	6	1.04414	100	0.0665943	157	50
21536.12	15802.12	5734	0.7	2	0	0	46	6	1.04414	100	0.0665943	157	50
15605	11845	3760	0.63	2	0	0	47	7	0.946595	100	0.0913791	152	49
22102.12	15802.12	6300	0.63	4	0	0	48	7	0.946595	100	0.0913791	154	49
11540	3498	8042	0.63	3	0	0	46	7	0.946595	100	0.0913791	154	49
21952.12	15802.12	6150	0.7	2	0	0	48	6	1.04414	100	0.0665943	157	50
23340.12	15802.12	7538	0.8	5	0	0	46	9	1.05168	105	0.0615707	142	50
19882.12	15802.12	4080	0.7	2	0	0	67	5	0.991607	106	0.0544835	169	46
24956.12	15802.12	9154	0.7	3	0	0	67	5	0.991607	91	0.0544835	169	46
25037.12	15802.12	9235	0.7	1	0	0	48	9	0.959183	105	0.120083	142	50
28209.12	15802.12	12407	0.1	2	0	0	87	8	0.899229	136	0.0833966	137	50
32687.12	15802.12	16885	0.7	3	0	0	79	8	0.951728	120	0.0784226	137	50
34757.12	15802.12	18955	0.71	2	0	0	47	9	1.05168	105	0.0615707	154	50
27667.12	15802.12	11865	0.65	3	0	0	72	8	0.951728	120	0.0784226	139	50
36102.12	15802.12	20300	0.6	1	1	1	65	5	0.919003	94	0.0617108	138	46
27467.12	15802.12	11665	0.71	1	0	0	46	9	1.05168	105	0.0615707	154	50
36067.12	15802.12	20265	0.74	1	0	0	47	9	1.05168	105	0.0615707	154	50
37148.12	15802.12	21346	0.71	1	0	0	48	9	1.04414	105	0.0665943	157	50
14170	11350	2820	0.6	4	0	0	60	10	1.01169	124	0.0741743	165	50
18805	15065	3740	0.61	2	0	0	105	10	1.01169	155	0.0741743	165	50
13639	8540	5099	0.6	1	0	0	65	11	0.971671	124	0.172712	190	50
18000	8000	10000	0.6	4	0	0	60	11	0.971671	124	0.172712	190	50
13420	6470	6950	0.6	0	0	0	64	11	0.971671	124	0.172712	190	50
14740	13490	1250	0.62	4	0	0	48	8	1.04407	98	0.0713584	152	49
8530	7080	1450	0.85	1	0	0	62	10	1.05919	64	0.1103	165	50
8765	6465	2300	0.6	2	0	0	71	10	0.971671	124	0.172712	190	50
12490	7050	5440	0.5	0	0	0	71	11	0.849198	133	0.0382676	169	50
15265	7315	7950	0.6	1	0	0	83	11	0.961717	151	0.128383	218	49
16802.12	15802.12	1000	0.65	4	0	0	59	10	1.05419	129	0.0854437	165	50
7600	3950	3650	0.6	4	0	0	75	11	0.961717	135	0.128383	218	49
10475	6400	4075	0.6	4	0	0	67	13	0.961717	139	0.128383	218	49
10130	5260	4870	0.7	2	0	0	58	10	1.05919	61	0.1103	165	50
12395	9795	2600	0.63	6	0	0	95	10	1.05419	156	0.0854437	170	50
12045	8545	3500	0.65	2	0	0	62	10	1.05419	129	0.0854437	170	50
11250	3250	8000	0.65	4	0	0	60	10	1.05419	124	0.0854437	170	50
21102.12	15802.12	5300	0.6	1	0	0	46	7	0.94408	98	0.105116	167	48
21985	11315	10670	0.71	3	0	0	58	10	1.05919	64	0.1103	165	50
36100	11150	24950	0.66	0	0	0	47	8	1.05659	102	0.0802666	159	50
36052.12	15802.12	20250	0.69	3	0	0	47	8	1.05659	98	0.0802666	159	50
30885	4375	26510	0.9	2	0	0	87	10	1.06424	179	0.103473	225	48
31157.12	15802.12	15355	0.6	2	0	0	46	7	0.94408	98	0.105116	167	48
26562.12	15802.12	10760	0.9	1	0	0	57	10	1.05919	71	0.1103	165	50
28392.12	15802.12	12590	0.62	2	1	1	105	10	1.02174	194	0.104078	238	49
39097.12	15802.12	23295	0.7	4	0	0	48	8	1.05659	98	0.0802666	159	50
35795	14249	21546	0.9	5	0	0	57	10	1.05919	61	0.1103	165	50
35452.12	15802.12	19650	0.6	3	0	0	47	7	0.914113	98	0.0652239	179	48
33752.12	15802.12	17950	0.7	2	0	0	46	8	1.05659	98	0.0802666	159	50
25177.12	15802.12	9375	0.63	3	0	0	46	8	1.04407	98	0.0713584	159	50
34052.12	15802.12	18250	0.65	1	1	1	64	10	1.05419	124	0.0854437	170	50
20665.96	10285.96	10380	0.8	1	0	0	56	12	1.15412	57	0.11328	172	50
20742.96	10285.96	10457	0.8	2	0	0	56	12	1.15412	65	0.11328	172	50
10685.96	10285.96	400	0.6	1	0	0	78	9	1.01917	72	0.0800845	172	50
19965.96	10285.96	9680	0.6	1	0	0	77	9	1.01917	78	0.0800845	172	50
14335.96	10285.96	4050	0.4	1	0	0	49	12	1.01168	157	0.145447	188	51
11235.96	10285.96	950	0.7	2	0	0	61	13	1.04917	134	0.0784613	215	50
21385.96	10285.96	11100	0.6	2	0	0	77	9	1.01917	78	0.0800845	172	50
21355.96	10285.96	11070	0.9	4	0	0	77	9	1.22411	72	0.103077	172	50
21405.96	10285.96	11120	0.71	2	0	0	78	9	1.05668	77	0.062043	175	50
15155.96	10285.96	4870	0.71	2	0	0	58	13	1.04917	119	0.0784613	215	50
23674.96	10285.96	13389	0.7	4	0	0	78	9	1.01917	72	0.0800845	172	50
14079.96	10285.96	3794	0.9	4	0	0	77	9	1.22411	72	0.103077	165	50
21685.96	10285.96	11400	0.9	1	0	0	56	12	1.15412	57	0.11328	178	50
36385.96	10285.96	26100	0.7	1	0	0	78	9	1.01917	78	0.0800845	172	50
34505.96	10285.96	24220	0.73	2	0	0	61	12	1.05668	75	0.062043	175	50
32785.96	10285.96	22500	0.6	3	0	0	50	12	1.01168	157	0.145447	188	51
25360.96	10285.96	15075	0.8	3	0	0	78	9	1.05668	72	0.062043	175	50
21940	18040	3900	0.7	4	0	0	119	13	0.99925	211	0.116981	187	46
11900	3500	8400	0	5	1	1	58	14	0.80678	135	0.0186642	161	47
15576	10765	4811	0.8	3	1	1	108	14	1.23429	156	0.0344763	169	31
18951	10300	8651	0.8	2	0	0	115	14	1.23429	147	0.0344763	169	31
32725	16700	16025	0.63	4	1	0	135	13	0.931778	198	0.0922975	178	48
33580	24830	8750	0.64	2	0	0	121	11	0.931778	198	0.0922975	178	48
40680	21480	19200	0.63	1	0	0	61	14	0.80678	135	0.0186642	161	47
27060	21560	5500	0.73	2	0	0	60	14	1.00929	138	0.0473828	170	40
13635.96	10285.96	3350	0.6	1	0	0	82	8	0.779284	159	0.0402109	122	48
21545.96	10285.96	11260	0.65	4	0	0	72	8	0.941809	159	0.0240187	138	46
23675.96	10285.96	13390	0.65	2	0	0	88	8	0.941809	159	0.0240187	138	46
19570.96	10285.96	9285	0.65	2	0	0	75	8	0.941809	159	0.0240187	143	42
15605.96	10285.96	5320	0.65	4	0	0	82	8	0.931822	159	0.0187837	143	41
15809.96	10285.96	5524	0.6	4	0	0	86	8	0.771826	159	0.0408787	123	47
17990.96	10285.96	7705	0.65	2	0	0	86	8	0.931822	159	0.0187837	143	41
17805.96	10285.96	7520	0.7	4	0	0	82	8	1.00929	159	0.0252185	154	40
21553.96	10285.96	11268	0.6	3	0	0	85	8	0.771826	159	0.0408787	123	47
22225.96	10285.96	11940	0.65	3	0	0	83	8	0.931822	159	0.0187837	143	41
19564.96	10285.96	9279	0.65	2	0	0	83	8	0.899295	159	0.0185459	155	44
15542	11342	4200	0.8	4	0	1	82	8	1.0493	159	0.0257117	158	31
30935.96	10285.96	20650	0.7	2	0	0	62	8	1.00929	144	0.0252185	154	40
37025	24025	13000	0.45	2	1	1	83	8	0.756784	159	0.0129909	144	46
[truncated: 1,594 more rows]
